# Supplementary material for: Withanolide A: synthesis and structural requirements for neurite outgrowth
Source: Royal Society of Chemistry journal article supplement (doi:10.1039/c3sc50653c), 2013-01-01

## Supporting Information

### Withanolide A: Synthesis and Structural Requirements for Neurite Outgrowth

Raphael Liffert <sup>[‡,a]</sup>, Johannes Hoecker <sup>[‡,a]</sup>, Chandan K. Jana <sup>[a,b]</sup>, Tom M. Woods <sup>[a,c]</sup>,  
Patrick Burch <sup>[a]</sup>, Henning J. Jessen <sup>[a,d]</sup>, Markus Neuburger <sup>[e]</sup> and Karl Gademann <sup>[a]\*</sup>

<sup>[‡]</sup> Both authors contributed equally to the work.

<sup>[a]</sup> R. Liffert, J. Hoecker, P. Burch, Prof. Dr. K. Gademann

Department of Chemistry, University of Basel

St. Johanns-Ring 19, 4056 Basel, Switzerland

E-mail: karl.gademann@unibas.ch

Fax: (+41)612-671-105

Homepage: <http://www.chemie.unibas.ch/~gademann>

<sup>[b]</sup> Dr. C. K. Jana

Present address: Department of Chemistry, Indian Institute of Technology Guwahati

781039 Guwahati, Assam, India

<sup>[c]</sup> Dr. T. Woods

Present address: Department of Chemistry, The University of Auckland

23 Symonds Street, Auckland CBD, New Zealand.

<sup>[d]</sup> Dr. H. J. Jessen

Present address: Institute of Organic Chemistry, University of Zurich

Winterthurerstrasse 190, 8057 Zurich, Switzerland

<sup>[e]</sup> Dr. M. Neuburger

Laboratory for chemical crystallography University of Basel

Spitalstrasse 51, 4056 Basel, Switzerland

---

#### Table of Content:

|     |                                                                  |     |
|-----|------------------------------------------------------------------|-----|
| I   | General Methods and Materials                                    | S2  |
| II  | Experimental Procedures                                          | S4  |
| III | <sup>1</sup> H and <sup>13</sup> C NMR spectra                   |     |
|     | Towards the Total Synthesis ( <b>Scheme 1</b> )                  | S31 |
|     | Total Synthesis of Withanolide A ( <b>Scheme 2</b> )             | S40 |
|     | Semi-Synthesis ( <b>Scheme 3, Scheme 4, Scheme 5, Scheme 6</b> ) | S49 |
| IV  | X-Ray Data                                                       | S64 |
| V   | Neuritogenic Properties                                          | S65 |

## I. General Methods and Materials

Unless otherwise stated, chemicals were purchased from Sigma-Aldrich or Acros and used without further purification. Solvents for work-up and chromatography were distilled from technical quality. Solvents used for chemical transformations were either puriss quality or dried by filtration through activated aluminium oxide under argon or nitrogen ( $\text{H}_2\text{O}$  content < 10 ppm, *Karl-Fischer* titration). Reactions involving air or moisture sensitive reagents or intermediates were performed under argon or nitrogen in glassware which had been oven dried or dried by a heat gun under high vacuum. Concentration under reduced pressure was performed by rotary evaporation at 40 °C (unless otherwise specified). Yields refer to purified, dried and spectroscopically pure compounds.

Analytical thin layer chromatography (TLC) was performed on Merck silica gel 60 F254 plates (0.25 mm thickness) precoated with fluorescent indicator. The developed plates were examined under UV light and stained with ceric ammonium molybdate followed by heating.

Flash chromatography was performed using silica gel 60 (230-240 mesh) from Fluka using a forced flow eluant at 0.3-0.5 bar pressure.

All  $^1\text{H}$  and  $^{13}\text{C}$  NMR spectra were recorded either using Bruker Avance 400 MHz ( $^1\text{H}$ ) & 101 MHz ( $^{13}\text{C}$ ) or Bruker Avance DRX 500 MHz ( $^1\text{H}$ ) & 126 MHz ( $^{13}\text{C}$ ) spectrometers at room temperature. Chemical shifts ( $\delta$ -values) are reported in ppm, spectra were calibrated related to solvent's residual proton chemical shift ( $\text{CHCl}_3$ ,  $\delta = 7.26$ ) and solvent's residual carbon chemical shift ( $\text{CDCl}_3$ ,  $\delta = 77.16$ ), multiplicity is reported as follows: s = singlet, br. s = broad singlet, d = doublet, t = triplet, q = quartet, quint. = quintet, sext. = sextet, hept. = heptet, m = multiplet or unresolved and coupling constant  $J$  in Hz.

IR spectra were recorded using a *Varian 800 FT-IR ATR Spectrometer*. The absorptions are reported in  $\text{cm}^{-1}$ .

Optical rotations  $[\alpha]_{\text{D}}^{\text{T}}$  were measured at the sodium D line using a 1 mL cell with a 1 dm path length on a Jasco P-2000 digital polarimeter and the concentration  $c$  is given in g/100mL and the used solvent is  $\text{CHCl}_3$ .

All masses spectra (HRMS-ESI) were recorded by the Mass spectrometric Service of University of Bern on Sciex QSTAR Pulsar mass spectrometer using electrospray ionization.

*Withanolide A: Synthesis and Structural Requirements for Neurite Outgrowth*

X-ray analyses:<sup>1</sup> Data collections for both crystal structures were performed at low temperature (123 K) using Mo  $K_{\alpha}$  radiation on an Bruker KappaAPEX diffractometer. Integration of the frames and data reduction was carried out using APEX2. The structures were solved by direct methods using SIR92. All non hydrogen atoms were refined using anisotropically by full-matrix least-squares on  $F$  using CRYSTALS. Hydrogen atoms were placed in calculated positions by means of the “riding” model. Melting points (M.p.) were determined using a Büchi B-545 apparatus in open capillaries and are uncorrected.

---

[<sup>1</sup>] i) Bruker Analytical X-ray Systems, Inc., **2006**. *Apex2*, Version 2 User Manual, M86-E01078, Madison, WI; ii) A. Altomare, G. Cascarano, C. Giacovazzo, A. Guagliardi, M. C. Burla, G. Polidori, M. Camalli, *J. Appl. Cryst.* **1994**, *27*, 435; iii) P. W. Betteridge, J. R. Carruthers, R. I. Cooper, K. Prout, D. J. Watkin, *J. Appl. Cryst.* **2003**, *36*, 1487.

## II. Experimental procedures

### Towards the Total Synthesis of Withanolide A

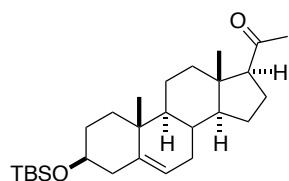

**TBS protected pregnenolone (2a):**<sup>2</sup> To a cold (0 °C) suspension of pregnenolone **2** (20.100 g, 63.513 mmol, 1 eq.) in dry THF (200 mL) was added imidazole (8.650 g, 127.075 mmol, 2 eq.) followed by TBDMSCl (14.360 g, 95.276 mmol, 1.5 eq.). Reaction mixture became a thick slurry. The reaction mixture was allowed to warm to RT and stirred for 18 h before being quenched with saturated aqueous NH<sub>4</sub>Cl. The mixture was extracted with Et<sub>2</sub>O and the combined organics were washed successively with H<sub>2</sub>O, NH<sub>4</sub>Cl and H<sub>2</sub>O, then dried over MgSO<sub>4</sub> and concentrated to a white solid. Purification by recrystallisation from refluxing EtOAc (155 mL) afforded the TBS protected pregnenolone **2a** as clear cuboid crystals (26.867 g, 62.374 mmol, 98%). TLC (7:3 hexane/EtOAc) *R*<sub>f</sub> = 0.85. [ $\alpha$ ]<sub>D</sub> = +22.7° (*c* = 0.25, CHCl<sub>3</sub>). M.p. 164-165 °C. <sup>1</sup>H NMR (400 MHz, CDCl<sub>3</sub>)  $\delta$ : 0.06 (6H, s), 0.63 (3H, s), 0.89 (9H, s), 0.98 (5H, m), 1.05 (1H, m), 1.18 (3H, m), 1.57 (12H, m), 1.82 (1H, dt, *J* = 13.2 Hz, *J* = 3.3 Hz), 2.01 (2H, m), 2.12 (3H, s), 2.20 (3H, m), 2.53 (1H, t, *J* = 9.0 Hz), 3.48 (1H, m), 5.31 (1H, m). <sup>13</sup>C NMR (100 MHz, CDCl<sub>3</sub>)  $\delta$ : -4.4, 13.4, 18.4, 19.6, 21.2, 23.0, 24.7, 26.1, 31.7, 32.0, 32.0, 32.2, 36.8, 37.6, 39.0, 42.9, 44.2, 50.2, 57.1, 63.9, 72.7, 121.0, 141.7, 209.7.

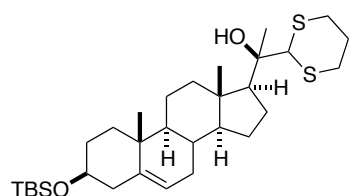

**Dithian (3):**<sup>2</sup> To a cold (-10 °C) solution of 1,3-dithiane (8.900 g, 0.074 mol, 2.0 eq.) in dry THF (65 mL) was added *n*-BuLi (1.6 M, 47.0 mL, 2.05 eq.) slowly and the reaction was stirred at -10 °C for 2 h. The mixture was then cooled to -78 °C and a cold (0 °C) solution of **2a** (15.943 g, 0.037 mol, 1.0 eq.) in dry THF (100 mL) was added slowly *via* syringe and the resulting mixture stirred at -78 °C for 5 h then allowed to warm slowly to RT and stirred for a further 18 h. The reaction was quenched with aqueous NH<sub>4</sub>Cl (50 mL), then extracted with Et<sub>2</sub>O, the combined organics were washed with H<sub>2</sub>O, dried over MgSO<sub>4</sub> and concentrated to afford an off-white solid (ca. 25 g, *d.r.* [<sup>1</sup>H NMR] = 15:1 [22*R*:22*S*]). The crude material was recrystallised from hot EtOAc/hexane (approx 1:1) affording the dithian **3** as a white solid (16.986 g, 0.031 mol, 84%). TLC (9:1 hexane/EtOAc) *R*<sub>f</sub> = 0.36.

<sup>2</sup> B. B. Shingate, B. G. Hazra, V. S. Pore, R. G. Gonnade, M. Bhadbhade, *Tetrahedron* **2007**, *63*, 5622.



*Withanolide A: Synthesis and Structural Requirements for Neurite Outgrowth*

$^1\text{H}$  NMR (400 MHz,  $\text{CDCl}_3$ )  $\delta$ : 0.05 (6H, s), 0.87 (3H, s), 0.89 (9H, s), 1.00 (3H, s), 1.44 (3H, s), 2.90 (4H, m), 3.48 (1H, m), 4.14 (1H, s), 5.31 (1H, m).  $^{13}\text{C}$  NMR (100 MHz,  $\text{CDCl}_3$ )  $\delta$ : -4.4, 13.5, 18.4, 19.6, 21.1, 21.8, 23.9, 24.3, 26.1, 26.2, 31.0, 31.5, 31.7, 31.9, 32.2, 36.7, 37.5, 40.3, 42.9, 43.1, 50.2, 55.3, 57.0, 61.4, 72.7, 76.9, 121.2, 141.7.

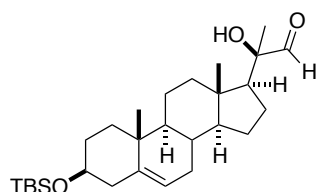

**Aldehyde (3a):** To a solution of dithian **3** (10.794 g, 19.591 mmol, 1.0 eq.) in  $\text{CH}_2\text{Cl}_2/\text{H}_2\text{O}$  (10:1, 150 mL) was added N-chlorosuccinimide (5.363 g, 40.161 mmol, 2.05 eq.) in portions under vigorous stirring. The reaction mixture was stirred at RT for 90 minutes then quenched with  $\text{Na}_2\text{S}_2\text{O}_3/\text{NaHCO}_3$  (1:1, 100 mL) and the aqueous phase extracted into  $\text{Et}_2\text{O}$  (3 x 100 mL). The combined organics were washed with  $\text{H}_2\text{O}$  (3 x 100 mL), dried over  $\text{MgSO}_4$  and concentrated to a white solid (10.550 g). Purification by filtration through a short pad of silica afforded aldehyde **3a** as a white solid (6.624 g, 14.375 mmol, 73%). TLC (4:1 hexane/ $\text{EtOAc}$ )  $R_f$  = 0.57.  $[\alpha]_D = -56.8^\circ$  ( $c$  = 0.45,  $\text{CHCl}_3$ ). M.p. 199-201 °C. FTIR (neat)  $\tilde{\nu}$  = 772, 837, 868, 887, 1080, 1254, 1358, 1385, 1470, 1728, 2858, 2858, 2936, 3375-3595  $\text{cm}^{-1}$ .  $^1\text{H}$  NMR (400 MHz,  $\text{CDCl}_3$ )  $\delta$ : 0.05 (6H, s), 0.79 (3H, s), 0.88 (9H, s), 0.96 (1H, m), 1.00 (3H, s), 1.07 (2H, m), 1.19 (1H, m), 1.32 (1H, m), 1.37 (3H, s), 1.44-1.64 (6H, m), 1.68 (1H, m), 1.70 (1H, m), 1.73 (1H, m), 1.79 (1H, m), 1.83 (1H, m), 1.98 (1H, m), 2.15 (1H, m), 2.21 (2H, m), 2.28 (1H, m), 3.14 (1H, s, OH), 3.50 (1H, m), 5.26 (1H, d,  $J$  = 5.0 Hz), 9.56 (1H, s).  $^{13}\text{C}$  NMR (125 MHz,  $\text{CDCl}_3$ )  $\delta$ : -4.2, 14.0, 18.4, 19.6, 21.1, 22.3, 23.1, 24.3, 26.1, 31.6, 31.9, 32.2, 36.7, 37.5, 40.2, 42.9, 43.4, 50.3, 55.6, 56.7, 72.7, 79.7, 121.0, 141.8, 203.7. HRMS ( $\text{ES}^-$ ) found M-H 459.3303,  $\text{C}_{28}\text{H}_{47}\text{O}_3\text{Si}$  calculated 459.3294.

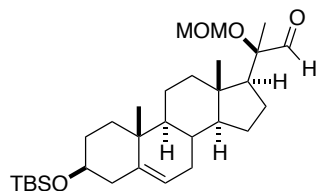

**MOM protected aldehyde (4):** To a cold (0 °C) solution of NaI (0.671 g, 4.479 mmol, 4 eq.) [that had been dried under high vacuum at 100 °C for 6 h] in dry dimethoxyethane (5 mL) was added freshly distilled MOMCl (0.451 mg, 5.599 mmol, 5 eq.) with vigorous stirring upon which a yellow suspension formed. The mixture was allowed to warm to RT and stirred for 10 minutes. This mixture was then added slowly *via* syringe to a cold (0 °C) solution

*Withanolide A: Synthesis and Structural Requirements for Neurite Outgrowth*

of aldehyde **3a** (0.516 g, 1.120 mmol, 1 eq.) and DIPEA (0.956 g, 6.159 mmol, 5.5 eq.) in dry DME (10 mL) and the reaction mixture heated at reflux for 18 h. The reaction mixture was allowed to cool to RT and quenched with 1 M aqueous Na<sub>2</sub>CO<sub>3</sub> (10 mL) and then extracted with Et<sub>2</sub>O. The combined organics were washed with H<sub>2</sub>O, dried over MgSO<sub>4</sub>, filtered and concentrated affording the crude material as an orange solid. The crude material was filtered through a short pad of silica (9:1 Hexane/EtOAc) and concentrated to afford MOM protected aldehyde **4** as an off-white solid (0.530 g). TLC (4:1 hexane/EtOAc)  $R_f = 0.70$ . The material was used crude in the next step.

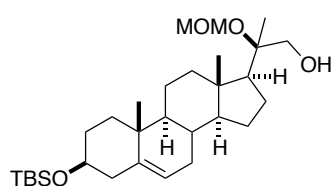

**Alcohol (4a):** To a suspension of aldehyde **4** (crude) in MeOH (20 mL) was added NaBH<sub>4</sub> (42 mg, 1.120 mmol) in four portions and the reaction mixture followed by TLC. After 1 h a further portion of NaBH<sub>4</sub> (10 mg) was added and the reaction mixture allowed to stir for another 1 h at RT until all the starting material has reacted. The mixture was quenched with H<sub>2</sub>O (10 mL) and extracted into Et<sub>2</sub>O (3 x 10 mL), the combined organics were washed with H<sub>2</sub>O, dried over MgSO<sub>4</sub>, filtered and concentrated affording the alcohol **4a** as a white solid (0.530 g) which displayed a single spot by TLC analysis. TLC (4:1 hexane/EtOAc)  $R_f = 0.40$ . The material was used crude in the next step.

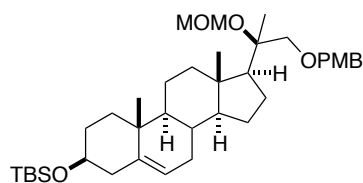

**PMB protected alcohol (4b):** To a cold (0 °C) solution of alcohol **4a** (crude) in a mixture of dry THF-DMF (4:1, 5 mL) was added NaH (38 mg, 1.569 mmol, 1.5 eq.) in 5 portions and the reaction mixture was allowed to warm to RT and stirred for 30 min during which time the solution turned cloudy. The reaction mixture was cooled to 0 °C and TBAI (77 mg, 0.209 mmol, 0.2 eq.) was added followed by the slow addition of PMBCl (328 mg, 2.092 mmol, 2 eq.). The reaction mixture was then allowed to warm to RT and followed by TLC. The reaction mixture was quenched with aqueous NH<sub>4</sub>Cl and extracted with Et<sub>2</sub>O, the combined organics were washed with H<sub>2</sub>O, dried over MgSO<sub>4</sub>, filtered and concentrated affording the crude material as an orange solid. Purification by silica gel chromatography (hexane/EtOAc, 98:2 to 95:5) furnished the PMB protected alcohol **4b** as a clear colourless oil (0.502 g, 0.801 mmol, 71% from **17**). TLC (95:5

*Withanolide A: Synthesis and Structural Requirements for Neurite Outgrowth*

hexane/EtOAc)  $R_f = 0.16$ .  $[\alpha]_D = -36.4^\circ$  ( $c = 0.34$ ,  $\text{CHCl}_3$ ). FTIR (neat)  $\tilde{\nu} = 775, 833, 1034, 1088, 1246, 1369, 1462, 1512, 1612, 2855, 2932 \text{ cm}^{-1}$ .  $^1\text{H NMR}$  (400 MHz,  $\text{CDCl}_3$ )  $\delta$ : 0.06 (6H, s), 0.81 (3H, s), 0.89 (9H, s), 0.82-0.94 (1H, m), 0.95-1.16 (6H, m), 1.18-1.30 (2H, m), 1.38 (3H, s), 1.41-1.65 (8H, m), 1.67-1.76 (2H, m), 1.80 (1H, dt,  $J = 13.2 \text{ Hz}$ ,  $J = 3.3 \text{ Hz}$ ), 1.84-2.05 (3H, m), 2.16 (1H, m), 2.27 (1H, m), 3.33 (3H, s), 3.35 (2H, s), 3.48 (1H, m), 3.81 (1H, s), 4.42 (2H, q,  $J = 11.7 \text{ Hz}$ ), 4.69 (1H, d,  $J = 7.1 \text{ Hz}$ ), 4.77 (1H, d,  $J = 7.1 \text{ Hz}$ ), 5.31 (1H, m), 6.87 (2H, d,  $J = 8.7 \text{ Hz}$ ), 7.24 (2H, d,  $J = 8.7 \text{ Hz}$ ).  $^{13}\text{C NMR}$  (125 MHz,  $\text{CDCl}_3$ )  $\delta$ : -4.4, 13.9, 19.6, 20.8, 21.1, 22.2, 24.0, 26.1, 31.5, 32.0, 32.2, 36.7, 37.5, 40.3, 42.6, 43.0, 50.3, 55.4, 55.6, 56.0, 57.0, 72.8, 73.1, 76.7, 79.7, 91.4, 113.8, 121.3, 129.2, 130.9, 141.8, 159.1. HRMS ( $\text{ES}^+$ ) found  $\text{MNa}^+ 649.4294$ ,  $\text{C}_{38}\text{H}_{62}\text{NaO}_5\text{Si}$  calculated 649.4265.

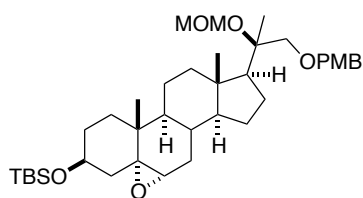

**Epoxide (5):** To a cold ( $0^\circ\text{C}$ ) solution of PMB protected alcohol **4b** (4.445 g, 7.089 mmol, 1 eq.) in DCM (20 mL) was slowly added *m*CPBA (1.835 g, 10.634 mmol, 1.5 eq.) in 15 portions upon which a white precipitate formed. The reaction mixture was stirred at  $0^\circ\text{C}$  for 10 min then allowed to warm to RT and followed by TLC. After 1 h the reaction was quenched by addition of saturated aqueous  $\text{Na}_2\text{SO}_3$  (30 mL) and extracted with  $\text{Et}_2\text{O}$ , the combined organics were washed with  $\text{Na}_2\text{SO}_3$  (3 x 20 mL) then  $\text{H}_2\text{O}$ , dried over  $\text{MgSO}_4$ , filtered and concentrated to afford epoxide **5** as a white solid (4.453 g, *d.r.*  $\alpha:\beta$  4.1:1) which displayed a single spot by TLC analysis. TLC (95:5 hexane/EtOAc)  $R_f = 0.24$ . The material was used crude in the next step.

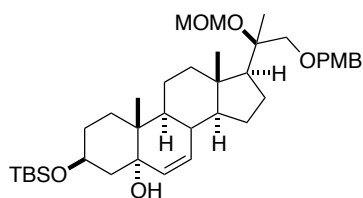

**Allylic alcohol (6):** To a solution of  $(\text{PhSe})_2$  (1.176 g, 3.767 mmol, 0.65 eq) in EtOH (70 mL) was added  $\text{NaBH}_4$  (0.329 g, 8.692 mmol, 1.5 eq) in small portions and the reaction mixture stirred for 10 min. Three further portions of  $\text{NaBH}_4$  (3 x 0.15 eq) were added upon which the solution turned from yellow to clear. To this mixture was slowly added a solution of epoxid **5** (3.726 g, 5.795 mmol, 1 eq) in dry THF (40 mL) *via* syringe and the reaction mixture brought to reflux and stirred for 3.5 h. After this time the reaction mixture was cooled to  $0^\circ\text{C}$  in an ice bath and  $\text{H}_2\text{O}_2$  (6.0 mL, 0.579 mol, 10 eq) was slowly added with

*Withanolide A: Synthesis and Structural Requirements for Neurite Outgrowth*

vigorous stirring and then the mixture was brought back to reflux for a further 30 min. The reaction mixture was cooled to RT, quenched with H<sub>2</sub>O and extracted with Et<sub>2</sub>O. The combined organics were washed with H<sub>2</sub>O, dried over MgSO<sub>4</sub>, filtered and concentrated to an off-white solid. Purification by silica gel chromatography (hexane/EtOAc, 95:5, 93:7, 9:1) afforded allylic alcohol **6** as a white solid (1.423 g, 2.213 mmol, 48%, 72% *brsm*). TLC (9:1 hexane/EtOAc)  $R_f = 0.30$ .  $[\alpha]_D = -31.8^\circ$  ( $c = 0.42$ , CHCl<sub>3</sub>). M.p. 127-128 °C. FTIR (neat)  $\tilde{\nu} = 772, 837, 907, 1034, 1084, 1246, 1358, 1462, 1516, 1616, 2886, 2932, 3414-3611$  cm<sup>-1</sup>. <sup>1</sup>H NMR (400 MHz, CDCl<sub>3</sub>)  $\delta$ : 0.06 (6H, s), 0.83 (3H, s), 0.87-0.92 (12H, m), 1.15-1.49 (m), 1.50-1.71 (m), 1.75 (2H, m), 1.92 (2H, m), 2.04 (1H, m), 3.33 (3H, s), 3.34 (2H, s), 3.80 (3H, s), 4.09 (1H, m), 4.37 (1H, d,  $J = 11.7$  Hz), 4.44 (1H, d,  $J = 11.7$  Hz), 4.69 (1H, d,  $J = 7.1$  Hz), 4.77 (1H, d,  $J = 7.1$  Hz), 5.55 (1H, m), 5.61 (m, 1 H), 6.87 (2H, d,  $J = 8.7$  Hz), 7.23 (2H, d,  $J = 8.7$  Hz). <sup>13</sup>C NMR (125 MHz, CDCl<sub>3</sub>)  $\delta$ : -4.4, 14.0, 14.8, 18.4, 20.8, 21.0, 22.2, 23.5, 26.1, 28.7, 31.1, 37.9, 38.1, 40.5, 41.5, 43.9, 45.1, 54.1, 55.4, 55.7, 55.8, 67.9, 73.1, 74.2, 76.6, 79.6, 91.4, 113.8, 129.2, 130.8, 133.0, 133.7, 159.2. HRMS (ES<sup>+</sup>) found MNa<sup>+</sup> 665.4194, C<sub>38</sub>H<sub>62</sub>O<sub>6</sub>SiNa calculated 665.4213.

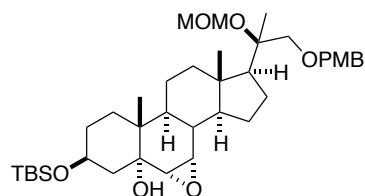

**Epoxy alcohol (6a):** To a cold (0°C) solution of allylic alcohol **6** (1.423 g, 2.213 mmol, 1 eq) in CH<sub>2</sub>Cl<sub>2</sub> (10 mL) was added *m*CPBA (0.497 g, 2.877 mmol, 1.3 eq). The reaction mixture was allowed to warm to

RT and stirred for 2 h and then quenched with saturated aqueous Na<sub>2</sub>SO<sub>3</sub> (10 mL). The mixture was extracted with Et<sub>2</sub>O, the combined organics were washed with saturated aqueous Na<sub>2</sub>SO<sub>3</sub> then H<sub>2</sub>O, dried over MgSO<sub>4</sub>, filtered and concentrated affording epoxy alcohol **6a** as a white foam (1.398 g, 2.121 mmol, 96%). TLC (4:1 hexane/EtOAc)  $R_f = 0.50$ .  $[\alpha]_D = -30.3^\circ$  ( $c = 0.24$ , CHCl<sub>3</sub>). M.p. 112.5-113.5 °C. FTIR (neat)  $\tilde{\nu} = 772, 837, 910, 1038, 1080, 1246, 1358, 1385, 1462, 1516, 2882, 2936, 3360-3595$  cm<sup>-1</sup>. <sup>1</sup>H NMR (400 MHz, CDCl<sub>3</sub>)  $\delta$ : 0.07 (6H, s), 0.82 (3H, s), 0.83 (3H, s), 0.89 (9H, s), 1.06 (1H, m), 1.12-1.88 (23H, m), 1.90-2.05 (2H, m), 2.89 (1H, d,  $J = 0.8$  Hz, OH), 2.94 (1H, d,  $J = 3.8$  Hz), 3.25 (1H, m), 3.30-3.37 (5H, m), 3.81 (3H, s), 4.13 (1H, m), 4.37 (1H, d,  $J = 11.7$  Hz), 4.44 (1H, d,  $J = 11.7$  Hz), 4.69 (1H, d,  $J = 7.1$  Hz), 4.77 (1H, d,  $J = 7.1$  Hz), 6.88 (2H, d,  $J = 8.7$  Hz), 7.23 (2H, d,  $J = 8.6$  Hz). <sup>13</sup>C NMR (125 MHz, CDCl<sub>3</sub>)  $\delta$ : -4.5, -4.4, 14.0, 15.1, 18.4, 20.6, 20.9, 22.3,

*Withanolide A: Synthesis and Structural Requirements for Neurite Outgrowth*

23.1, 26.1, 28.0, 30.9, 35.3, 37.8, 38.4, 40.2, 42.3, 43.8, 51.7, 55.4, 55.6, 55.7, 58.1, 58.5, 67.7, 71.0, 73.1, 76.7, 79.9, 91.4, 113.8, 129.2, 130.8, 159.2. HRMS (ES<sup>+</sup>) found MNa<sup>+</sup> 681.4156, C<sub>38</sub>H<sub>62</sub>O<sub>7</sub>SiNa calculated 681.4163.

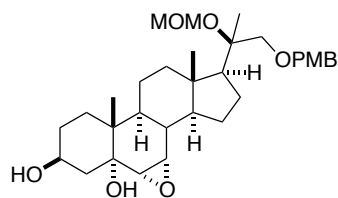

**Diol (7):** To a solution of epoxy alcohol **6a** (1.191 g, 1.807 mmol, 1 eq) in dry THF (7 mL) was added TBAF (1 M in THF, 7.2 mL, 7.229 mmol, 4 eq) at RT and the reaction mixture followed by TLC. After 20 h the reaction mixture was concentrated directly onto silica gel and purified by silica gel chromatography (1:1, 1:0 EtOAc/hexane) affording diol **7** as a white solid (0.841 g, 1.543 mmol, 85%). TLC (EtOAc)  $R_f = 0.52$ .  $[\alpha]_D = -38.3^\circ$  ( $c = 0.20$ , CHCl<sub>3</sub>). M.p. 155.5-156.5 °C. FTIR (neat)  $\tilde{\nu} = 903, 1038, 1088, 1254, 1381, 1470, 1512, 1612, 2940, 3348-3603$  cm<sup>-1</sup>. <sup>1</sup>H NMR (400 MHz, CDCl<sub>3</sub>)  $\delta$ : 0.83 (3H, s), 0.84 (3H, s), 1.02-1.34 (8H, m), 1.34-1.42 (2H, m), 1.47-1.55 (3H, m), 1.58-1.83 (7H, m), 1.83-2.06 (5H, m), 2.94 (1H, m), 2.96 (1H, d,  $J = 3.9$  Hz), 3.26 (1H, m), 3.33 (5H, m), 3.81 (3H, s), 4.17 (1H, m), 4.37 (1H, d,  $J = 11.7$  Hz), 4.44 (1H, d,  $J = 11.7$  Hz), 4.69 (1H, d,  $J = 7.1$  Hz), 4.77 (1H, d,  $J = 7.1$  Hz), 6.88 (2H, d,  $J = 8.6$  Hz), 7.23 (2H, d,  $J = 8.7$  Hz). <sup>13</sup>C NMR (125 MHz, CDCl<sub>3</sub>)  $\delta$ : 14.0, 15.0, 20.5, 20.9, 22.2, 23.1, 27.9, 30.3, 35.3, 37.8, 38.3, 40.2, 41.6, 43.9, 51.7, 55.4, 55.6, 55.7, 58.0, 58.4, 67.1, 70.9, 73.1, 76.6, 79.5, 91.4, 113.8, 129.2, 130.7, 159.2. HRMS (ES<sup>+</sup>) found MNa<sup>+</sup> 567.3346, C<sub>32</sub>H<sub>48</sub>O<sub>7</sub>Na calculated 567.3292.

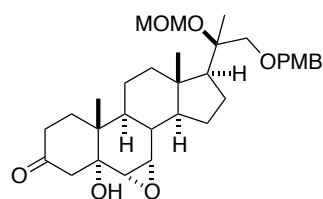

**Ketone (7a):** To a solution of diol **7** (1.485 g, 2.725 g, 1 eq) and NMO (0.479 g, 4.088 mmol, 1.5 eq) in dry DCM (15 mL) containing molecular sieves was added TPAP (48 mg, 0.136 mmol, 0.05 eq) in a single portion and the reaction followed by TLC. After 4 h the reaction was quenched with saturated aqueous Na<sub>2</sub>SO<sub>3</sub> (20 mL) and extracted with Et<sub>2</sub>O. The combined organics were washed with H<sub>2</sub>O, dried over MgSO<sub>4</sub>, filtered and concentrated to a white solid. The crude material was purified by recrystallisation from refluxing hexane/EtOAc (3:1) affording ketone **7a** as thin needle like crystals (1.050 g, 1.935 mmol, 71%). The filtrate was purified by silica gel chromatography (1:1 hexane/EtOAc) affording the title compound **7a** (0.205 g, 0.378 mmol, 14%; combined yield (1.255 g, 85%). TLC

*Withanolide A: Synthesis and Structural Requirements for Neurite Outgrowth*

(1:1 hexane/EtOAc)  $R_f = 0.31$ .  $[\alpha]_D = -18.9^\circ$  ( $c = 0.33$ ,  $\text{CHCl}_3$ ). M.p. 135-136 °C. FTIR (neat)  $\tilde{\nu} = 818, 891, 1034, 1092, 1250, 1385, 1450, 1512, 1612, 1720, 2330, 2361, 2928, 3333\text{-}3607 \text{ cm}^{-1}$ .  $^1\text{H NMR}$  (400 MHz,  $\text{CDCl}_3$ )  $\delta$ : 7.25 (2H, d), 6.88 (2H, d), 4.80 (1H, d), 4.69 (1H, d), 4.47 (1H, d), 4.38 (1H, d), 3.82 (3H, s), 3.35-3.39 (5H, m), 3.34 (1H, m), 2.94-3.00 (2H, m, OH), 2.64 (1H, dd), 2.33-2.50 (3H, m), 2.07 (1H, m), 2.02 (1H, m), 1.88 (1H, m), 1.76-1.86 (3H, m), 1.68 (1H, m), 1.50 (1H, m), 1.40 (4H, m), 1.38 (2H, m), 1.27-1.35 (2H, m), 1.16 (1H, m), 1.02 (3H, s), 0.87 (3H, s).  $^{13}\text{C NMR}$  (125 MHz,  $\text{CDCl}_3$ )  $\delta$ : 13.5, 15.0, 19.8, 20.5, 21.8, 22.6, 28.6, 34.1, 36.2, 37.5, 37.6, 39.5, 43.5, 48.8, 51.3, 3 x 55, 56.8 (C-6), 57.8, 72.6, 73.1, 76.2, 79.4, 91.0, 113.0, 128.0, 130.7, 159.1, 210.0. HRMS ( $\text{ES}^+$ ) found  $\text{MH}^+$  565.3157,  $\text{C}_{32}\text{H}_{46}\text{NaO}_7$  calculated 565.3141.

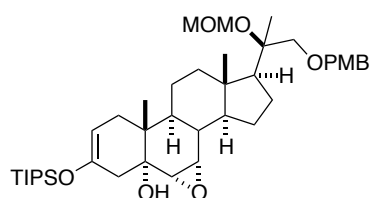

**TIPS protected enol (7b):** To a cold (0 °C) solution of ketone **7a** (50 mg,  $9.2 \times 10^{-5}$  mol, 1 eq) and  $\text{Et}_3\text{N}$  (17 mg, 23  $\mu\text{L}$ ,  $1.66 \times 10^{-4}$  mol, 1.8 eq) in dry DCM (1 mL) was added freshly distilled TIPSOTf (34 mg, 30  $\mu\text{L}$ ,  $1.11 \times 10^{-4}$  mol, 1.2 eq) dropwise. The reaction mixture stirred at 0 °C for 10 min then allowed to warm to RT and followed by TLC. Reaction complete after 2 h. The reaction was quenched with aqueous 1 M  $\text{NaHCO}_3$  (1 mL) and extracted into  $\text{Et}_2\text{O}$ . The combined organics were washed with  $\text{H}_2\text{O}$ , dried over  $\text{MgSO}_4$ , filtered and concentrated to a yellow oil (67 mg). Purification by silica gel chromatography (95:5 to 9:1 hexane/EtOAc) afforded the TIPS protected enol **7b** as a clear colourless oil (61 mg,  $8.7 \times 10^{-5}$  mol, 94%; 1.26 g Scale gave 69% yield). TLC (9:1 hexane/EtOAc)  $R_f = 0.23$ .  $[\alpha]_D = +0.38$  ( $c = 0.27$ ,  $\text{CHCl}_3$ ). FTIR (neat)  $\tilde{\nu} = 802, 883, 1038, 1096, 1196, 1246, 1381, 1462, 1512, 1612, 1670, 2866, 2943, 3414\text{-}3645 \text{ cm}^{-1}$ .  $^1\text{H NMR}$  (400 MHz,  $\text{CDCl}_3$ )  $\delta$ : 0.78 (3H, s), 0.84 (3H, s), 1.04-1.44 (m), 1.52-1.84 (6H, m), 1.90-2.03 (3H, m), 2.15 (1H, dd,  $J = 16.8 \text{ Hz}$ ,  $J = 1.1 \text{ Hz}$ ), 2.34 (1H, dd,  $J = 16.9 \text{ Hz}$ ,  $J = 1.5 \text{ Hz}$ ), 2.83 (1H, d,  $J = 1.4 \text{ Hz}$ ), 2.96 (1H, d,  $J = 3.8 \text{ Hz}$ ), 3.26 (1H, dd,  $J = 3.7 \text{ Hz}$ ,  $J = 2.1 \text{ Hz}$ ), 3.34 (5H, m), 3.81 (3H, s), 4.37 (1H, d,  $J = 11.7 \text{ Hz}$ ), 4.44 (1H, d,  $J = 11.7 \text{ Hz}$ ), 4.70 (1H, d,  $J = 7.1 \text{ Hz}$ ), 4.78 (2H, m), 6.88 (2H, d,  $J = 8.7 \text{ Hz}$ ), 7.23 (2H, d,  $J = 8.7 \text{ Hz}$ ).  $^{13}\text{C NMR}$  (125 MHz,  $\text{CDCl}_3$ )  $\delta$ : 12.8, 13.9, 15.7, 18.2, 20.4, 20.9, 22.2, 23.2, 31.4, 35.0, 37.1, 37.7, 40.0, 40.1, 43.6, 51.6, 55.4, 55.65, 55.67, 57.5, 57.9, 69.7, 73.1, 76.6, 79.6, 91.4, 101.6, 113.8, 129.2, 130.8, 147.2, 159.2. HRMS ( $\text{ES}^+$ ) found  $\text{MH}^+$  699.4650,  $\text{C}_{41}\text{H}_{67}\text{O}_7\text{Si}$  calculated 699.4651.

*Withanolide A: Synthesis and Structural Requirements for Neurite Outgrowth*

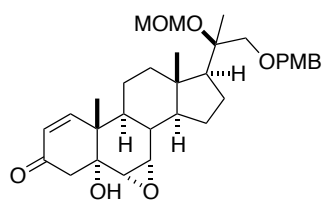

**Enone (8):** To a solution of TIPS protected enol **7b** (1.082 g, 1.548 mmol, 1 eq) in MeCN (15 mL) was added Pd(OAc)<sub>2</sub> (0.347 g, 1.548 mmol, 1 eq) in small portions and the reaction followed by TLC. Reaction complete after 8 h. Crude reaction mixture filtered through a short pad of silica gel (1:1 hexane/EtOAc) affording the crude material as a red oil (0.925 g). Purification by silica gel chromatography (3:2 hexane/EtOAc) afforded enone **8** as a white solid (0.449 g, 0.831 mmol, 54%). TLC (1:1 hexane/EtOAc)  $R_f = 0.47$ .  $[\alpha]_D = -3.6$  ( $c = 0.30$ , CHCl<sub>3</sub>). M.p. 117-118 °C. FTIR (neat)  $\tilde{\nu} = 775, 818, 907, 1026, 1092, 1246, 1369, 1462, 1516, 1616, 1678, 2858, 2932, 2974, 3395-3591$  cm<sup>-1</sup>. <sup>1</sup>H NMR (400 MHz, CDCl<sub>3</sub>)  $\delta$ : 0.88 (3H, s), 1.15 (3H, s), 1.23-1.35 (3H, m), 1.36-1.55 (7/8H, m), 1.60-1.72 (3H, m), 1.76-1.88 (3/4H, m), 2.00 (1H, m), 2.10 (1H, dt,  $J = 12.2$  Hz,  $J = 2.4$  Hz), 2.65 (1H, d,  $J = 17.1$  Hz), 2.84 (1H, dd,  $J = 17.0$  Hz,  $J = 2.0$  Hz), 3.07 (1H, d,  $J = 3.8$  Hz), 3.19 (1H, d,  $J = 2.0$  Hz), 3.33-3.38 (7H, m), 3.81 (3H, s), 4.38 (1H, d,  $J = 11.7$  Hz), 4.45 (1H, d,  $J = 11.7$  Hz), 4.70 (1H, d,  $J = 7.1$  Hz), 4.78 (1H, d,  $J = 7.1$  Hz), 5.98 (1H, d,  $J = 10.1$  Hz), 6.88 (2H, d,  $J = 8.6$  Hz), 6.97 (1H, d,  $J = 10.3$  Hz), 7.23 (2H, d,  $J = 8.7$  Hz). <sup>13</sup>C NMR (125 MHz, CDCl<sub>3</sub>)  $\delta$ : 14.0, 20.6, 20.7, 20.9, 22.2, 23.1, 30.5, 35.3, 35.6, 39.9, 42.8, 43.6, 46.6, 51.6, 55.4, 55.5, 55.7, 56.6, 57.7, 72.1, 73.1, 76.5, 79.4, 91.4, 113.8, 128.0, 129.2, 130.6, 153.3, 159.2, 196.8. HRMS (ES<sup>+</sup>) found  $MNa^+$  563.2985, C<sub>32</sub>H<sub>44</sub>O<sub>7</sub>Na calculated 563.2986.

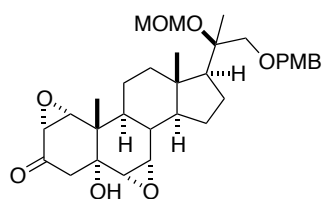

**Epoxy ketone (8a):** To a cold (0 °C) solution of enone **8** (24 mg,  $4.4 \times 10^{-5}$  mol, 1 eq) in THF (1 mL) was added H<sub>2</sub>O<sub>2</sub> (45  $\mu$ L,  $4.44 \times 10^{-4}$  mol, 10 eq) then K<sub>2</sub>CO<sub>3</sub> (6.1 mg,  $4.4 \times 10^{-5}$  mol, 1 eq) as a solution in H<sub>2</sub>O (0.1 mL). The reaction mixture was stirred at 0 °C for 10 min then allowed to warm to RT and followed by TLC. Reaction complete after 3 h. The reaction was quenched with saturated aqueous NH<sub>4</sub>Cl and extracted with Et<sub>2</sub>O, the combined organics were washed with H<sub>2</sub>O, dried over MgSO<sub>4</sub>, filtered and concentrated. Purification by silica gel chromatography (1:1 hexane/EtOAc) afforded the epoxy ketone **8a** as a white foam (13.3 mg,  $2.4 \times 10^{-5}$  mol, 54%). TLC (1:1 hexane/EtOAc)  $R_f = 0.25$ .



*Withanolide A: Synthesis and Structural Requirements for Neurite Outgrowth*

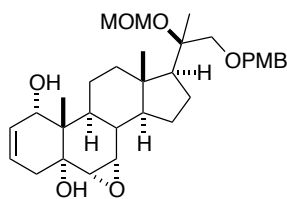

**Allylic alcohol (8b):** A mixture of  $\text{N}_2\text{H}_4 \cdot \text{HCl}$  (4.9 mg,  $7.2 \times 10^{-5}$  mol, 3 eq) and  $\text{Et}_3\text{N}$  (15  $\mu\text{L}$ ,  $1.10 \times 10^{-4}$  mol, 4.6 eq) in dry MeCN (0.3 mL) were sonicated for 2 h. The reaction mixture was then cooled in an ice bath and a solution of epoxy ketone **8a** (13.3 mg,  $2.4 \times 10^{-5}$  mol, 1 eq) in dry MeCN (0.3 mL) was added dropwise. The reaction mixture was allowed to warm to RT and stirred for 1.5 h or until no starting material remains. The reaction was quenched with  $\text{H}_2\text{O}$  and extracted with  $\text{Et}_2\text{O}$ , the combined organics were washed with  $\text{H}_2\text{O}$ , dried over  $\text{MgSO}_4$ , filtered and concentrated to afford the crude allylic alcohol **8b** as an off-white solid (9.5 mg), which displayed a single spot by TLC analysis. TLC (3:2 hexane/ $\text{EtOAc}$ )  $R_f = 0.41$ . The material was used without purification in the next step.

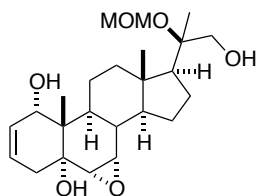

**Triol (9):** To a solution of allylic alcohol **8b** (9.5 mg,  $1.8 \times 10^{-5}$  mol, 1 eq) in  $\text{CH}_2\text{Cl}_2/\text{H}_2\text{O}$  mixture (10:1, 0.5 mL) was added DDQ (4.8 mg,  $2.1 \times 10^{-5}$  mol, 1.2 eq) in a single portion and the reaction mixture stirred at RT and followed by TLC. After 1 h the reaction mixture was quenched with  $\text{H}_2\text{O}$  and extracted with  $\text{Et}_2\text{O}$ , the combined organics were washed with  $\text{H}_2\text{O}$ , dried over  $\text{MgSO}_4$ , filtered and concentrated to afford triol **9** as a yellow solid. Purification by silica gel chromatography (2:3 hexane/ $\text{EtOAc}$ ) afforded the title compound as a white solid (5.0 mg,  $1.2 \times 10^{-5}$  mol, 50% over two steps). TLC (2:3 hexane/ $\text{EtOAc}$ )  $R_f = 0.27$ .

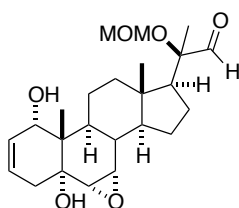

**Aldehyde (10):** To a solution of triol **9** (5.0 mg,  $1.2 \times 10^{-5}$  mol, 1 eq) and NMO (3.5 mg,  $3.0 \times 10^{-5}$  mol, 2.5 eq) in dry DCM (0.5 mL) containing molecular sieves was added TPAP (0.5 mg,  $1.0 \times 10^{-6}$  mol, 0.1 eq) in a single portion and the reaction followed by TLC. After 2.5 h the reaction was quenched with saturated aqueous  $\text{Na}_2\text{SO}_3$  and extracted with  $\text{Et}_2\text{O}$ . The combined organics were washed with  $\text{H}_2\text{O}$ , dried over  $\text{MgSO}_4$ , filtered and concentrated to afford aldehyde **10** as an off-white solid (3.8 mg, 75%).



### Total synthesis of withanolide A

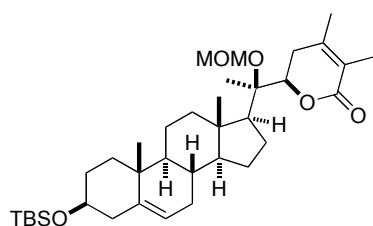

**Lactone 12:** A solution of ethyl 2,3-dimethylbut-2-enoate (384 mg, 2.70 mmol) and DMPU (2.5 mL, distilled freshly over CaH<sub>2</sub>) in THF (2.5 mL) was added dropwise to a solution of LiHMDS (3.0 mL 1.0 M in THF, 3.0 mmol) in THF (2.5 mL) at -78 °C

(dry ice-acetone bath) and the mixture was stirred for 1.5h at that temperature. A solution of protected aldehyde **4** (0.5 g, 1.0 mmol) in THF (3.0 mL) was then added dropwise and the resulting mixture was stirred at -78 °C for 6 h. The temperature of the reaction mixture was allowed to increase to RT during overnight. Then, the reaction was quenched by addition of saturated NH<sub>4</sub>Cl solution. The mixture was extracted with Et<sub>2</sub>O. The combined organic layers were washed brine, dried over MgSO<sub>4</sub> and concentrated under reduced pressure. The residue was purified by flash column chromatography (pentane:Et<sub>2</sub>O 3:1) to afford lactone **12** as a 93:7 mixture of diastereoisomers (518 mg, 0.862 mmol, 87%) as white foam. TLC: *R<sub>f</sub>* = 0.3 (pentane:EtOAc 7:1). [ $\alpha$ ]<sub>D</sub> = +19.4° (*c* = 0.44, CHCl<sub>3</sub>). FTIR (neat)  $\tilde{\nu}$  = 2931, 1714, 1463, 1381, 1318, 1253, 1083, 1016, 889, 836, 775, 670 cm<sup>-1</sup>. <sup>1</sup>H NMR (500 MHz, CDCl<sub>3</sub>)  $\delta$  = 5.32-5.29 (m, 1H), 4.97 (d, *J* = 6.6 Hz, 1H), 4.82 (d, *J* = 6.6 Hz, 1H), 4.25 (dd, *J* = 13.3, 3.3 Hz, 1H), 3.51-3.44 (m, 1H), 3.37 (s, 3H), 2.53-2.44 (m, 1H), 2.29-2.22 (m, 1H), 2.18-2.10 (m, 2H), 2.02-1.96 (m, 3H), 1.93 (s, 3H), 1.86 (s, 3H), 1.84-1.67 (m, 4H), 1.65-1.45 (m, 7H), 1.39 (s, 3H), 1.35-1.27 (m, 2H), 1.07-1.00 (m, 2H), 0.99-0.96 (m, 3H), 0.88 (s, 9H), 0.86 (s, 3H), 0.05 (s, 6H). <sup>13</sup>C NMR (126 MHz, CDCl<sub>3</sub>)  $\delta$  = 166.3, 148.9, 141.8, 122.0, 121.1, 92.8, 82.3, 80.0, 72.7, 56.8, 56.4, 54.5, 50.2, 43.1, 42.9, 40.3, 37.5, 36.7, 32.2, 32.2, 31.9, 31.5, 26.1, 24.1, 22.0, 21.0, 20.6, 19.5, 18.4, 18.0, 13.9, 12.6, -4.5. Analyses calculated for C<sub>36</sub>H<sub>60</sub>O<sub>5</sub>Si requires: C = 71.95, H = 10.06, found: C = 72.04, H = 9.86.

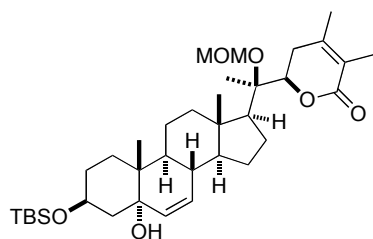

**Allylic alcohol 13:** *meso*-Tetraphenylporphyrin (30 mg, 49  $\mu$ mol) was added to a solution of alkene **12** (0.42 g, 0.70 mmol) in pyridine (5 mL) and the mixture was stirred for 4 h at RT with continuous bubbling of O<sub>2</sub> under Na-light (150 W) irradiation.

After the disappearance of the starting material, the oxygen flow was stopped, the Na-light was removed and the mixture was charged with triphenylphosphene (0.63 g,

*Withanolide A: Synthesis and Structural Requirements for Neurite Outgrowth*

2.4 mmol). The resulting mixture was stirred for 1 h at RT. The solvent was removed under vacuum and the residue was purified by flash column chromatography (pentane:Et<sub>2</sub>O 1:1) to obtain allylic alcohol **13** (0.26 g, 0.42 mmol, 61%) as pale yellow foam. TLC:  $R_f = 0.2$  (pentane:Et<sub>2</sub>O 2:1).  $[\alpha]_D = +32.5^\circ$  ( $c = 0.6$ , CHCl<sub>3</sub>). FTIR (neat)  $\tilde{\nu} = 3467, 2932, 2890, 2857, 1709, 1469, 1382, 1253, 1130, 1094, 1065, 1012, 871, 836, 759 \text{ cm}^{-1}$ . <sup>1</sup>H NMR (500 MHz, CDCl<sub>3</sub>)  $\delta = 5.60$  (d,  $J = 10.2$  Hz, 1H), 5.56 (dd,  $J = 9.9, 2.1$  Hz, 1H), 5.00 (d,  $J = 6.6$  Hz, 1H), 4.83 (d,  $J = 6.6$  Hz, 1H), 4.25 (dd,  $J = 13.3, 3.2$  Hz, 1H), 4.11-4.05 (m, 1H), 3.37 (s, 3H), 2.48-2.42 (m, 1H), 2.13-2.09 (m, 1H), 2.07-2.00 (m, 2H), 1.97-1.95 (m, 1H), 1.92 (s, 3H), 1.87 (s, 3H), 1.75-1.65 (m, 5H), 1.59-1.43 (m, 5H), 1.41 (s, 3H), 1.38-1.19 (m, 6H), 0.91 (s, 3H), 0.90 (s, 3H), 0.88 (s, 9H), 0.06 (br. s, 6H). <sup>13</sup>C NMR (126 MHz, CDCl<sub>3</sub>)  $\delta = 166.2, 148.8, 133.9, 132.6, 122.1, 93.0, 82.3, 79.9, 74.1, 67.9, 56.4, 54.6, 54.0, 45.1, 44.5, 41.5, 40.7, 38.1, 37.8, 32.3, 31.1, 28.7, 26.1, 23.6, 22.0, 21.0, 20.6, 18.4, 17.8, 14.8, 14.0, 12.6, -4.4, -4.5$ . HRMS (ESI) Exact mass calculated for C<sub>36</sub>H<sub>60</sub>O<sub>6</sub>NaSi ([M+Na]<sup>+</sup>): 639.4051, found: 639.4066.

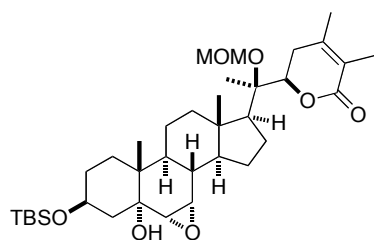

**Epoxy alcohol 13a:** *m*CPBA (100 mg, 579  $\mu\text{mol}$ ) was added to an ice cold solution of allylic alcohol **13** (200 mg, 324  $\mu\text{mol}$ ) in CH<sub>2</sub>Cl<sub>2</sub> (2 mL), the ice bath was then removed and the mixture was stirred at RT for 4h. The mixture was diluted with Et<sub>2</sub>O and the reaction was quenched with saturated aqueous Na<sub>2</sub>SO<sub>3</sub> solution. The mixture was extracted with Et<sub>2</sub>O and the combined organic layers were washed with saturated aqueous NaHCO<sub>3</sub>, brine, dried over MgSO<sub>4</sub> and concentrated under vacuum. The residue was purified by flash column chromatography (pentane:Et<sub>2</sub>O 2:1) to give epoxy alcohol **13a** as 96:4 mixtures of diastereoisomers (197 mg, 311  $\mu\text{mol}$ , 96%) as white foam. TLC:  $R_f = 0.2$  (pentane:Et<sub>2</sub>O 2:1).  $[\alpha]_D = +33.3^\circ$  ( $c = 0.55$ , CHCl<sub>3</sub>). FTIR (neat)  $\tilde{\nu} = 3541, 2934, 2899, 2858, 1713, 1469, 1384, 1254, 1131, 1096, 1015, 836, 776 \text{ cm}^{-1}$ . <sup>1</sup>H NMR (500 MHz, CDCl<sub>3</sub>)  $\delta = 5.00$  (d,  $J = 6.6$  Hz, 1H), 4.80 (d,  $J = 6.6$  Hz, 1H), 4.22 (dd,  $J = 13.3, 3.3$  Hz, 1H), 4.13-4.07 (m, 1H), 3.34 (s, 3H), 3.24-3.22 (m, 1H), 2.92 (d,  $J = 3.9$  Hz, 1H), 2.83 (s, 1H), 2.41-2.35 (m, 1H), 2.04-1.99 (m, 3H), 1.90 (s, 3H), 1.83 (s, 3H), 1.81-0.97 (m, 16H), 1.39 (s, 3H), 0.88 (s, 3H), 0.86 (s, 9H), 0.81 (s, 3H), 0.04 (s, 3H), 0.04 (s, 3H). <sup>13</sup>C NMR (126 MHz, CDCl<sub>3</sub>)  $\delta = 166.1,$

*Withanolide A: Synthesis and Structural Requirements for Neurite Outgrowth*

148.7, 122.0, 93.0, 82.3, 79.7, 70.8, 67.6, 58.4, 57.9, 56.4, 54.7, 51.6, 44.2, 42.1, 40.4, 38.3, 37.7, 35.1, 32.3, 30.7, 27.9, 26.0, 23.1, 21.9, 20.6, 20.5, 18.3, 17.5, 15.0, 13.8, 12.5, -4.5, -4.6. HRMS (ESI) Exact mass calculated for C<sub>36</sub>H<sub>60</sub>O<sub>7</sub>NaSi ([M+Na]<sup>+</sup>): 655.4001, found: 655.4011.

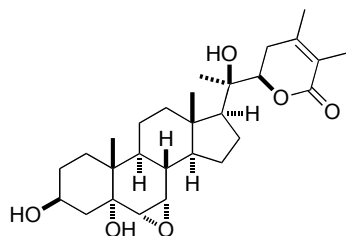

**Triol 14:** An aqueous solution of HCl (0.5 mL, 6 M) was added to a solution of epoxide **13a** (197 mg, 311 μmol) in THF (6 mL) at RT. The reaction mixture was stirred for 1 h at RT. The mixture was then diluted with CH<sub>2</sub>Cl<sub>2</sub> (5 mL) and the reaction was quenched with saturated NaHCO<sub>3</sub> solution. The mixture was extracted with CH<sub>2</sub>Cl<sub>2</sub> and the combined organic layers were washed brine, dried over MgSO<sub>4</sub> and concentrated under vacuum. The residue was purified by flash column chromatography (CH<sub>2</sub>Cl<sub>2</sub>:MeOH 36:1) to give triol **14** (118 mg, 249 μmol, 80 %) as white solid. M.p.: 311- 312 °C. TLC: *R<sub>f</sub>* = 0.3 (CH<sub>2</sub>Cl<sub>2</sub>:MeOH 20:1). [*α*]<sub>D</sub> = +37.0° (*c* = 0.46, CHCl<sub>3</sub>). FTIR (neat)  $\tilde{\nu}$  = 3463, 2941, 2872, 1699, 1384, 1319, 1134, 1096, 1038, 755 cm<sup>-1</sup>. <sup>1</sup>H NMR (500 MHz, CDCl<sub>3</sub>)  $\delta$  = 4.20 (dd, *J* = 13.4, 3.4 Hz, 1H), 4.19-4.13 (m, 1H), 3.28-3.26 (m, 1H), 2.98 (d, *J* = 3.8 Hz, 1H), 2.42-2.36 (m, 1H), 1.95 (s, 3H), 1.89 (s, 3H), 2.12-1.07 (m, 19H), 1.30 (s, 3H), 0.92 (s, 3H), 0.85 (s, 3H). <sup>13</sup>C NMR (126 MHz, CDCl<sub>3</sub>)  $\delta$  = 166.2, 149.0, 122.2, 81.1, 75.2, 70.9, 67.1, 58.4, 58.0, 54.5, 51.8, 44.3, 41.6, 40.3, 38.4, 37.8, 35.2, 31.8, 30.3, 27.9, 23.1, 22.2, 21.2, 20.7, 20.6, 15.0, 13.9, 12.6. HRMS (ESI) Exact mass calculated for C<sub>28</sub>H<sub>42</sub>O<sub>6</sub>Na ([M+Na]<sup>+</sup>): 497.2874, found: 497.2877.

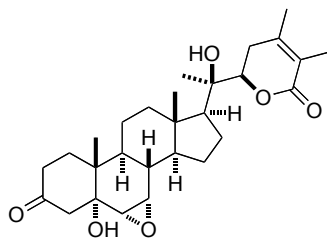

**Ketone 14a:** Powdered 4Å molecular sieves (200 mg) were added to a solution of alcohol **14** (51 mg, 0.11 mmol) in CH<sub>2</sub>Cl<sub>2</sub> (7 mL) and the mixture was stirred for 5 min at RT. Then *N*-methyl morpholine *N*-oxide (21 mg, 0.18 mmol) and TPAP (2 mg, 6 μmol) were successively added to the solution and the mixture was stirred at RT for 3 h. The mixture was diluted with CH<sub>2</sub>Cl<sub>2</sub> and the reaction was quenched with saturated aqueous Na<sub>2</sub>S<sub>2</sub>O<sub>3</sub> solution. The mixture was then extracted with CH<sub>2</sub>Cl<sub>2</sub>. The combined organic layers were washed brine, dried over MgSO<sub>4</sub> and concentrated under vacuum. The residue was purified by flash column chromatography

*Withanolide A: Synthesis and Structural Requirements for Neurite Outgrowth*

(CH<sub>2</sub>Cl<sub>2</sub>:MeOH 100:1) to give ketone **14a** (48 mg, 0.1 mmol, 95%) as white solid. M.p.: 262.5 - 264 °C. TLC:  $R_f$  = 0.5 (CH<sub>2</sub>Cl<sub>2</sub>:MeOH 20:1).  $[\alpha]_D^{25}$  = +56.5° ( $c$  = 0.31, CHCl<sub>3</sub>). FTIR (neat)  $\tilde{\nu}$  = 3504, 2944, 2874, 1708, 1385, 1318, 1134, 1098, 757 cm<sup>-1</sup>. <sup>1</sup>H NMR (500 MHz, CDCl<sub>3</sub>)  $\delta$  = 4.20 (dd,  $J$  = 13.3, 3.4 Hz, 1H), 3.31 (m, 1H), 2.95 (d,  $J$  = 3.7 Hz, 1H), 2.91 (d,  $J$  = 2.3 Hz, 1H), 2.66 (dd,  $J$  = 15.2, 2.1 Hz, 1H), 2.44-2.33 (m, 5H), 2.12-2.00 (m, 3H), 1.94 (s, 3H), 1.88 (s, 3H), 1.86-1.79 (m, 3H), 1.63-1.56 (m, 1H), 1.51-1.46 (m, 2H), 1.42-1.23 (m, 5H), 1.30 (s, 3H), 1.17-1.12 (m, 1H), 0.99 (s, 3H), 0.94 (s, 3H). <sup>13</sup>C NMR (126 MHz, CDCl<sub>3</sub>)  $\delta$  = 209.3, 166.1, 149.0, 122.1, 81.1, 75.2, 72.6, 58.0, 57.4, 54.4, 51.7, 49.1, 44.1, 40.1, 38.1, 37.9, 37.1, 34.8, 31.7, 29.1, 23.2, 22.2, 21.2, 20.7, 20.5, 15.3, 13.8, 12.6. HRMS (ESI) Exact mass calculated for C<sub>28</sub>H<sub>41</sub>O<sub>6</sub> ([M+H]<sup>+</sup>): 473.2898, found: 473.2888.

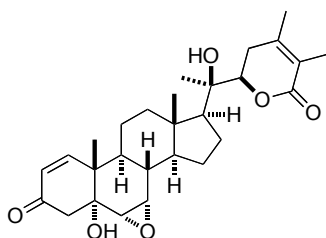

**Enone 15:** 2-Iodoxybenzoic acid (36 mg, 0.13 mmol) and 4-methoxy-pyridine-*N*-oxide hydrate (16 mg, 0.13 mmol) were dissolved in DMSO (0.5 mL) under stirring for 20 min at RT. The mixture was then charged with ketone **14a** (20 mg, 42  $\mu$ mol) and the mixture was stirred for 5 d at 40 °C. The reaction was quenched with aqueous saturated NaHCO<sub>3</sub> solution and the mixture was extracted with CH<sub>2</sub>Cl<sub>2</sub>. The combined organic layers were washed brine, dried over Na<sub>2</sub>SO<sub>4</sub> and concentrated under vacuum. The residue was purified by flash column chromatography (CH<sub>2</sub>Cl<sub>2</sub>:MeOH 100:1) to give enone **15** as a mixture with ca. 10% inseparable starting material (18 mg, 34  $\mu$ mol of enone, 81%) as white solid which was directly used for the next step without further purification. TLC:  $R_f$  = 0.5 (CH<sub>2</sub>Cl<sub>2</sub>:MeOH 20:1).

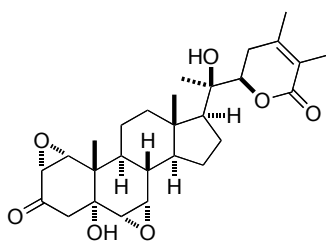

**Epoxy ketone 15a:** Benzyltrimethylammonium hydroxide (Triton B; 40 wt% solution in methanol, 10  $\mu$ L) was added to an ice-cold solution of enone **15** (15 mg of 10:1 mixture, 29  $\mu$ mol of enone) and H<sub>2</sub>O<sub>2</sub> (30 wt% solution in H<sub>2</sub>O, 0.25 mL) in THF (1 mL). The reaction mixture was stirred at 0 °C for 3 h. The reaction was then quenched with saturated aqueous NH<sub>4</sub>Cl solution and the mixture was extracted with CH<sub>2</sub>Cl<sub>2</sub>. The combined organic layers were washed with brine, dried over Na<sub>2</sub>SO<sub>4</sub> and concentrated under vacuum. The residue was purified by flash column chromatography

*Withanolide A: Synthesis and Structural Requirements for Neurite Outgrowth*

(EtOAc:hexane:CHCl<sub>3</sub>, 8:7:1) to give epoxy ketone **15a** (8.5 mg, 17 μmol, 60%) as white foam. TLC:  $R_f$  = 0.2 (EtOAc:hexane:CHCl<sub>3</sub>, 8:7:1).  $[\alpha]_D^{25} = +65.7^\circ$  ( $c = 0.25$ , CHCl<sub>3</sub>). FTIR (neat)  $\tilde{\nu} = 3480, 2926, 1707, 1463, 1385, 1261, 1134, 1098, 1033, 754$  cm<sup>-1</sup>. <sup>1</sup>H NMR (400 MHz, CDCl<sub>3</sub>)  $\delta = 4.21$  (dd,  $J = 13.4, 3.5$  Hz, 1H), 4.18 (s, 1H), 3.56 (d,  $J = 4.0$  Hz, 1H), 3.44 (d,  $J = 4.0$  Hz, 1H), 3.20-3.18 (m, 1H), 2.86-2.81 (m, 2H), 2.61 (d,  $J = 19.1$  Hz, 1H), 2.41 (br. s, 1H), 2.38-2.34 (m, 1H), 2.20-2.17 (m, 1H), 2.13-2.01 (m, 3H), 1.97 (s, 3H), 1.89 (s, 3H), 1.85-1.79 (m, 1H), 1.75-1.71 (m, 1H), 1.62-1.35 (m, 7H), 1.33 (s, 3H), 1.02 (s, 3H), 0.98 (s, 3H). <sup>13</sup>C NMR (126 MHz, CDCl<sub>3</sub>)  $\delta = 203.1, 166.2, 149.0, 122.2, 81.1, 75.2, 69.5, 60.9, 56.3, 55.2, 54.8, 54.4, 51.4, 47.8, 44.2, 39.8, 39.1, 35.9, 34.5, 31.8, 23.1, 22.1, 21.4, 21.1, 20.8, 16.9, 13.8, 12.6$ . HRMS (ESI) Exact mass calculated for C<sub>28</sub>H<sub>39</sub>O<sub>7</sub> ( $[M+H]^+$ ): 487.2690, found: 487.2680.

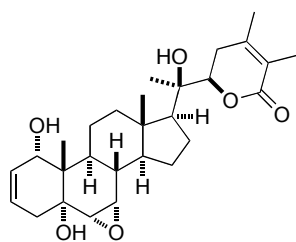

**Allylic alcohol 16:** Solid hydrazine monohydrochloride (10 mg, 0.15 mmol) was added to a solution of Et<sub>3</sub>N (31 μL, 0.22 mmol) in dry CH<sub>3</sub>CN (0.7 mL) and the mixture was sonicated for 2 h at RT. Then the turbid reaction mixture was cooled to 0 °C and charged with a suspension of epoxy ketone **15a** (10 mg, 21 μmol) in CH<sub>3</sub>CN (1.0 mL). The resulting mixture was allowed to warm to RT and stirred for 3 h at that temperature. The solvent was removed under reduced pressure and the residue was dissolved in CH<sub>2</sub>Cl<sub>2</sub> and water. The mixture was extracted with CH<sub>2</sub>Cl<sub>2</sub>. The combined organic layers were washed with brine, dried over Na<sub>2</sub>SO<sub>4</sub> and concentrated under vacuum. The residue was purified by flash column chromatography (EtOAc:hexane:CHCl<sub>3</sub>, 8:7:1) to give allylic alcohol **16** (6.0 mg, 13 μmol, 62 %) as white solid. TLC:  $R_f = 0.6$  (EtOAc:hexane:CHCl<sub>3</sub>, 8:1:1).  $[\alpha]_D^{25} = +98.4^\circ$  ( $c = 0.25$ , CHCl<sub>3</sub>). <sup>1</sup>H NMR (500 MHz, CDCl<sub>3</sub>)  $\delta = 5.96$ -5.93 (m, 1H), 5.75-5.72 (m, 1H), 4.22 (dd,  $J = 13.3, 3.4$  Hz, 1H), 3.56 (dd,  $J = 11.3, 4.7$  Hz, 1H), 3.50 (d,  $J = 11.4$  Hz, 1H), 3.33 (m, 1H), 3.15 (s, 1H), 2.96 (d,  $J = 3.8$  Hz, 1H), 2.41-2.33 (m, 2H), 2.30-2.22 (m, 2H), 2.14-2.01 (m, 4H), 1.95 (s, 3H), 1.89 (s, 3H), 1.87-1.79 (m, 3H), 1.64-1.23 (m, 6H), 1.32 (s, 3H), 0.96 (s, 3H), 0.78 (s, 3H). <sup>13</sup>C NMR (126 MHz, CDCl<sub>3</sub>)  $\delta = 166.9, 148.9, 129.8, 124.1, 122.2, 81.1, 75.3, 71.4, 70.8, 58.0, 57.5, 54.5, 52.0, 44.3, 40.4, 40.1, 35.7, 34.9, 34.7, 31.8, 23.2, 22.1, 21.3, 20.7, 20.3, 15.3, 13.8, 12.6$ .

*Withanolide A: Synthesis and Structural Requirements for Neurite Outgrowth*

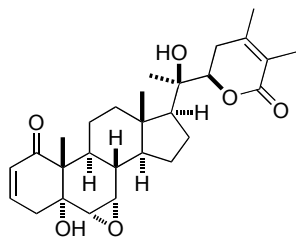

**Withanolide A (1):** Powdered 4 Å molecular sieves (50 mg) were added to the solution of allylic alcohol **16** (6.5 mg, 14 μmol) in CH<sub>2</sub>Cl<sub>2</sub> (1.0 mL) and the mixture was stirred for 5 min at RT. Pyridinium dichromate (10 mg, 26 μmol) was added and the mixture was stirred for 5 h at RT. The mixture was filtered through a pad of celite and the celite pad was washed with CH<sub>2</sub>Cl<sub>2</sub> (10 mL). The combined organic layer was successively washed with 1N HCl and brine, dried over Na<sub>2</sub>SO<sub>4</sub> and concentrated under vacuum. The residue was purified by flash column chromatography (EtOAc:hexane:CHCl<sub>3</sub>, 8:7:1) to afford withanolide A **1** (5.2 mg, 11 μmol, 80%) as white solid. M.p.: 284.2-285 °C [lit: 282-284 °C]. TLC:  $R_f$  = 0.5 (EtOAc:hexane:CHCl<sub>3</sub>, 8:1:1).  $[\alpha]_D^{25} = +86.6^\circ$  ( $c = 0.18$ , CHCl<sub>3</sub>) [lit:  $[\alpha]_D^{25} = +88^\circ$  ( $c = 0.02$ , CHCl<sub>3</sub>)]. FTIR (neat)  $\tilde{\nu} = 3507, 2922, 1720, 1690, 1384, 1291, 1132, 907, 756 \text{ cm}^{-1}$ . <sup>1</sup>H NMR (500 MHz, CDCl<sub>3</sub>)  $\delta = 6.59$  (ddd,  $J = 10.0, 5.0, 2.0$  Hz, 1H), 5.85 (dd,  $J = 10.1, 2.5$  Hz, 1H), 4.21 (dd,  $J = 13.3, 3.4$  Hz, 1H), 3.32 (m, 1H), 3.12 (s, 1H, OH), 3.04 (d,  $J = 3.8$  Hz, 1H), 2.75-2.67 (m, 2H), 2.53 (dd,  $J = 18.7, 5.1$  Hz, 1H), 2.42-2.36 (m, 2H), 2.14-2.00 (m, 3H), 1.96 (s, 3H), 1.89 (s, 3H), 1.87-1.81 (m, 1H), 1.80-1.75 (m, 1H), 1.61-1.34 (m, 8H), 1.32 (s, 3H), 1.18 (s, 3H), 0.96 (s, 3H). <sup>13</sup>C NMR (126 MHz, CDCl<sub>3</sub>)  $\delta = 203.3, 166.2, 148.9, 139.8, 129.2, 122.2, 81.2, 75.2, 73.4, 57.5, 56.5, 54.6, 52.1, 51.1, 44.0, 40.5, 36.9, 35.7, 35.2, 31.8, 23.3, 21.9, 21.9, 21.2, 20.7, 14.9, 13.9, 12.6$ . HRMS (ESI) Exact mass calculated for C<sub>28</sub>H<sub>39</sub>O<sub>6</sub> ( $[M+H]^+$ ): 471.2741, found: 471.2729.

### Semisynthetic studies:

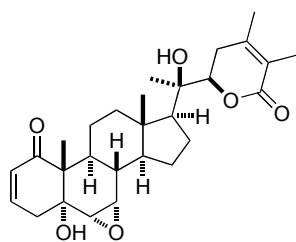

**Isolation Procedure for Withanolide A (1):** The dried Ashwagandha roots (1.5 kg) were placed in a large column and percolated with MeOH (3 L) several times. The MeOH extracts were concentrated from 3 L to 1 L under reduced pressure and then washed with *n*-pentane (3 x 250 mL).

The MeOH extracts were then carefully concentrated under reduced pressure affording a thick brown oil, which was suspended in EtOAc (300 mL), washed with H<sub>2</sub>O (3 x 200 mL), dried over MgSO<sub>4</sub> and concentrated to a brown oil (4.39 g). The crude material was purified by silica gel chromatography using a graduated eluent system (40% to 100% EtOAc/pentane at intervals of 10%, 1.5 column lengths of eluent/fraction) and each fraction was collected in an Erlenmeyer and concentrated separately and analyzed by HPLC and TLC. Withanolide A was found to be present in the 70% and 80% fractions. These two fractions were combined and purified by column chromatography [CH<sub>2</sub>Cl<sub>2</sub>:MeOH 30:1 (25 g SiO<sub>2</sub>) and 40:1 (50 g SiO<sub>2</sub>)] affording withanolide A (340 mg, 0.722 mmol, 0.025% from mass of dried roots) as an off-white solid. M.p.: 287.2-289 °C [lit: 282-284 °C] TLC: *R*<sub>f</sub> = 0.5 (EtOAc:hexane:CHCl<sub>3</sub>, 8:1:1). [ $\alpha$ ]<sub>D</sub> = + 86.8 (*c* = 1.15, CHCl<sub>3</sub>). HPLC/MS: *R*<sub>t</sub> = 48.9 min, *m/z* (ES<sup>+</sup>) 493.2 (MNa<sup>+</sup>). UV vis: 228.5 nm. <sup>1</sup>H NMR (400 MHz, CDCl<sub>3</sub>)  $\delta$  = 6.58 (ddd, *J* = 10.1, 5.0, 2.1 Hz, 1H), 5.83 (dd, *J* = 10.2, 2.2 Hz, 1H), 4.20 (dd, *J* = 13.3, 3.4 Hz, 1H), 3.31 (s, 1H), 3.16 (s, 1H, OH), 3.04 (d, *J* = 3.9 Hz, 1H), 2.76-2.62 (m, 2H), 2.51 (dd, *J* = 18.8, 5.1 Hz, 1H), 2.44-2.33 (m, 2H), 2.20-1.99 (m, 3H), 1.95 (s, 3H), 1.88 (s, 3H), 1.85-1.72 (m, 2H), 1.61-1.33 (m, 7H), 1.31 (s, 3H), 1.17 (s, 3H), 0.95 (s, 3H). <sup>13</sup>C NMR (126 MHz, CDCl<sub>3</sub>)  $\delta$  = 203.3, 166.2, 149.0, 139.8, 129.1, 122.1, 81.1, 75.2, 73.4, 57.4, 56.5, 54.5, 52.0, 51.1, 44.0, 40.5, 36.9, 35.7, 35.2, 31.8, 23.3, 21.9, 21.9, 21.2, 20.7, 14.9, 13.9, 12.6.

*Withanolide A: Synthesis and Structural Requirements for Neurite Outgrowth*

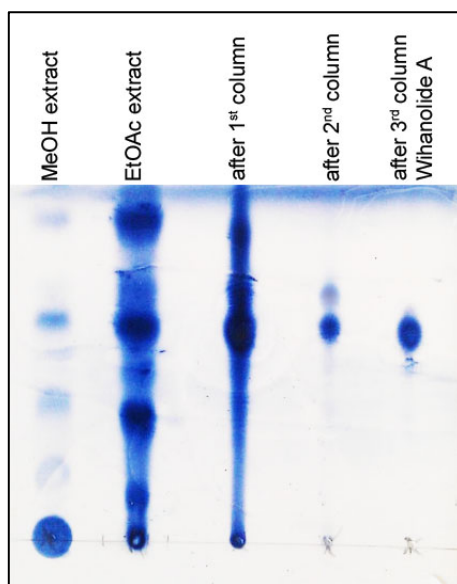

**Figure 1:** TLC of the MeOH extract, EtOAc extract and after 1<sup>st</sup>, 2<sup>nd</sup> and 3<sup>rd</sup> column; eluent: pure EtOAc; Cerium-ammonium-molybdate (CAM) stain.



*Withanolide A: Synthesis and Structural Requirements for Neurite Outgrowth*

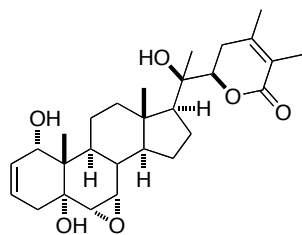

**Allylic alcohol (16):**<sup>3</sup> To a cold solution (0 °C) of withanolide A **1** (50.0 mg, 0.106 mmol, 1 eq) in CHCl<sub>3</sub>/MeOH (3.0 mL, 1:1) was added CeCl<sub>3</sub> x 7 H<sub>2</sub>O (79.2 mg, 0.212 mmol, 2 eq). After 5 min NaBH<sub>4</sub> (40.2 mg, 1.060 mmol, 10 eq) was added over a period of 3 h in 4 portions until TLC indicated full conversion. The reaction was quenched by addition of saturated NH<sub>4</sub>Cl solution, extracted with CH<sub>2</sub>Cl<sub>2</sub>, dried over Na<sub>2</sub>SO<sub>4</sub> and evaporated. The crude product was subjected to flash chromatography (EtOAc/pentane, 3:2) to yield allylic alcohol **16** (29.0 mg, 0.062 mmol, 58%) as a colorless solid. M.p. : 255-257 °C. TLC : R<sub>f</sub> = 0.6 (EtOAc:hexane:CHCl<sub>3</sub>, 8:1:1). [α]<sub>D</sub> = +112.2° (c = 0.40, CHCl<sub>3</sub>). FTIR (neat):  $\tilde{\nu}$  = 3480, 2944, 1703, 1384, 1290, 1217, 1132, 1028, 910, 784 cm<sup>-1</sup>. <sup>1</sup>H NMR (400 MHz, CDCl<sub>3</sub>) δ = 5.89 (d, J = 9.9 Hz, 1H), 5.72-5.66 (m, 1H), 4.18 (dd, J = 13.0, 3.7 Hz, 1H), 3.52 (s, 1H), 3.51 (s, 1H), 3.43 (s, 1H), 3.31-3.27 (m, 1H), 2.95 (d, J = 3.8 Hz, 1H), 2.40 (s, 1H), 2.35-1.95 (m, 6H), 1.92 (s, 3H), 1.85 (s, 3H), 1.84-1.72 (m, 3H), 1.63 – 1.31 (m, 7H), 1.28 (s, 3H), 0.93 (s, 3H), 0.75 (s, 3H).

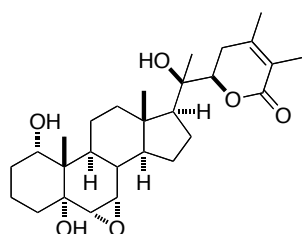

**Alcohol 17:** Allylic alcohol **16** (10.0 mg, 0.021 mmol, 1.0 eq) and Crabtree's catalyst (0.34 mg, 2 mol%) were dissolved in CH<sub>2</sub>Cl<sub>2</sub> (0.2 mL) in a small vial. The vial was placed in an autoclave and the mixture was stirred at RT for 2 h under a H<sub>2</sub> atmosphere (10 bar). The solvent was removed, the residue filtered through a short pad of silica (EtOAc) and evaporated to yield alcohol **17** (10.0 mg, 0.021 mmol, quant.) as a colorless solid. M.p. = 251 °C (decomposed). TLC: R<sub>f</sub> = 0.74 (EtOAc). [α]<sub>D</sub> = +46.4° (c = 0.5, CHCl<sub>3</sub>). FTIR (neat):  $\tilde{\nu}$  = 3578, 3464, 3362, 2938, 1717, 1445, 1381, 1316, 1103, 1021, 949, 913, 854, 757, 687 cm<sup>-1</sup>. <sup>1</sup>H NMR (400 MHz, CDCl<sub>3</sub>) δ = 4.49 (d, J = 10.7 Hz, 1H), 4.21 (dd, J = 13.3, 3.5 Hz, 1H), 3.58-3.51 (m, 1H), 3.50 (d, J = 1.2 Hz, 1H), 3.28 (dd, J = 3.9, 2.4 Hz, 1H), 2.90 (d, J = 3.9 Hz, 1H), 2.43-2.31 (m, 2H), 2.18-2.00 (m, 4H), 1.95 (s, 3H), 1.89 (s, 3H), 1.86-1.33 (m, 15H), 1.31 (s, 3H), 0.94 (s, 3H), 0.80 (s, 3H). <sup>13</sup>C NMR (101 MHz, CDCl<sub>3</sub>) δ = 166.14, 148.89, 122.19, 81.15, 75.24, 72.37, 72.07, 58.52, 57.80, 54.48, 52.00, 44.50, 40.25, 40.22, 35.39, 35.24, 32.53, 31.79, 28.81, 23.13,

*Withanolide A: Synthesis and Structural Requirements for Neurite Outgrowth*

22.17, 21.25, 20.69, 19.89, 16.06, 15.86, 13.88, 12.62. UPLC/MS:  $R_t = 2.015$  min,  $m/z$  ( $ES^+$ ) 971.5 ( $2M + Na^+$ ).

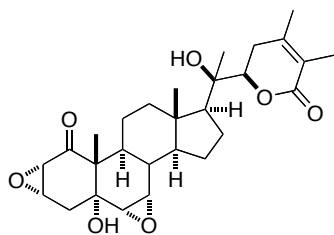

**Epoxy ketone 18:** To a solution of withanolide A **1** (100 mg, 0.21 mmol, 1.0 eq) and TBHP (5.5 M in decane, 100  $\mu$ L, 0.55 mmol, 2.6 eq) in  $CH_2Cl_2$  (1.3 mL) was added dropwise TBAF (1 M in THF, 425  $\mu$ L, 0.43 mmol, 2 eq) and the mixture was stirred at RT for

15 h. The reaction was then diluted with water and extracted with  $CH_2Cl_2$ . The organic layer was dried over  $Na_2SO_4$  and concentrated under reduced pressure. The residue was purified by flash column chromatography (EtOAc/pentane, 2:1 to pure EtOAc) to give epoxy ketone **18** (78.4 mg, 0.16 mmol, 76%) as a colorless solid. M.p. = 285  $^{\circ}C$  (decomposed). TLC:  $R_f = 0.37$  (EtOAc).  $[\alpha]_D^{25} = +107.1^{\circ}$  ( $c = 0.5$ ,  $CHCl_3$ ). FTIR (neat):  $\tilde{\nu} = 3476, 2967, 2924, 1981, 1706, 1517, 1468, 1382, 1318, 1221, 1187, 1141, 1107, 1069, 1009, 952, 897, 852, 815, 757, 648$   $cm^{-1}$ .  $^1H$  NMR (400 MHz,  $CDCl_3$ )  $\delta = 4.17$  (dd,  $J = 13.3, 3.5$  Hz, 1H), 3.61-3.54 (m, 1H), 3.29 (d,  $J = 3.4$  Hz, 1H), 3.26-3.18 (m, 2H), 2.94 (d,  $J = 3.8$  Hz, 1H), 2.54-2.41 (m, 2H), 2.42-2.29 (m, 2H), 2.23 (dd,  $J = 15.9, 2.4$  Hz, 1H), 2.14-1.97 (m, 3H), 1.94 (s, 3H), 1.87 (s, 3H), 1.84-1.21 (m, 12H), 1.10 (s, 3H), 0.92 (s, 3H).  $^{13}C$  NMR (101 MHz,  $CDCl_3$ )  $\delta = 203.68, 166.10, 148.97, 122.06, 81.09, 75.15, 70.75, 56.36, 54.43, 53.44, 52.77, 52.09, 51.67, 43.86, 40.23, 35.17, 34.84, 33.32, 31.77, 23.26, 21.87, 21.50, 21.21, 20.66, 13.76, 13.50, 12.56$ . HRMS (ESI) Exact mass calculated for  $C_{28}H_{39}O_7^+$   $[M+H]^+$ : 487.2690, found: 487.2689.

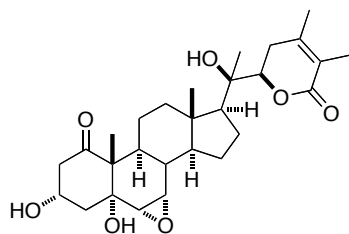

**$\beta$ -Hydroxy ketone 19:** To a solution of  $(PhSe)_2$  (96.2 mg) in EtOH (1.0 mL) was added  $NaBH_4$  (23.3 mg) and acetic acid (10  $\mu$ L). The stock solution was stirred for 10 min at RT and then added (0.2 mL, 0.123 mmol, 3 eq) to a solution of epoxy ketone **18**

(20 mg, 0.041 mmol, 1.0 eq) in  $CH_2Cl_2$  (0.2 mL). The resulting yellow mixture was stirred at RT for 1 h, then diluted with  $CH_2Cl_2$  and washed with saturated brine. The organic phase was dried over  $NaSO_4$ , concentrated and subjected to flash column chromatography (EtOAc) to yield  $\beta$ -hydroxy ketone **19** (16 mg, 0.033 mmol, 80%) as

*Withanolide A: Synthesis and Structural Requirements for Neurite Outgrowth*

a colorless solid. M.p. = 275-276 °C. TLC:  $R_f$  = 0.37 (EtOAc).  $[\alpha]_D = +148.2^\circ$  ( $c$  = 0.36,  $\text{CHCl}_3$ ). FTIR (neat):  $\tilde{\nu}$  = 3478, 2924, 1707, 1388, 1142, 1008, 897, 814, 759, 649  $\text{cm}^{-1}$ .  $^1\text{H}$  NMR (400 MHz,  $\text{CDCl}_3$ )  $\delta$  = 4.40-4.33 (m, 1H), 4.20 (dd,  $J$  = 13.3, 3.5 Hz, 1H), 4.16-4.07 (m, 1H), 3.46 (d,  $J$  = 2.0 Hz, 1H), 3.30 (dd,  $J$  = 3.9, 2.2 Hz, 1H), 3.14 (dd,  $J$  = 8.1, 6.1 Hz, 1H), 3.10 (d,  $J$  = 3.9 Hz, 1H), 2.56-2.26 (m, 4H), 2.19-1.99 (m, 4H), 1.96 (s, 3H), 1.89 (s, 3H), 1.86-1.78 (m, 1H), 1.77-1.67 (m, 1H), 1.66-1.34 (m, 7H), 1.31 (s, 3H), 1.27-1.20 (m, 1H), 1.19 (s, 3H), 0.94 (s, 3H).  $^{13}\text{C}$  NMR (101 MHz,  $\text{CDCl}_3$ )  $\delta$  = 210.33, 166.13, 148.91, 122.21, 81.14, 75.21, 68.92, 57.57, 56.40, 54.53, 53.73, 51.95, 47.20, 44.32, 40.42, 38.49, 35.53, 34.83, 31.83, 23.23, 22.02, 21.65, 21.26, 20.72, 16.02, 13.98, 12.63. HRMS (ESI) Exact mass calculated for  $\text{C}_{28}\text{H}_{41}\text{O}_7^+$   $[\text{M}+\text{H}]^+$ : 489.2847, found: 489.2837.

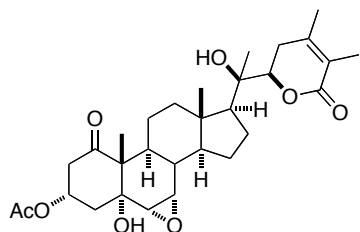

**Acetate 20:** To a solution of  $\beta$ -hydroxy ketone **19** (10 mg, 0.021 mmol, 1.0 eq) in  $\text{CH}_2\text{Cl}_2$  (0.3 mL) was added acetic anhydride (9.6  $\mu\text{L}$ , 0.102 mmol, 5 eq), DMAP (2.5 mg, 0.021 mmol, 1.0 eq), and  $\text{Et}_3\text{N}$  (29  $\mu\text{L}$ , 0.210 mmol, 10 eq). The colorless solution was stirred

at RT for 45 min, then quenched with 0.1 M HCl and extracted with  $\text{CH}_2\text{Cl}_2$ . The organic phase was dried over  $\text{Na}_2\text{SO}_4$  and evaporated. The residue was purified by column chromatography (pentane/EtOAc 1:2) affording acetate **20** (8.4 mg, 0.016 mmol, 78%) as a colorless solid. M.p. = 237-238 °C. TLC:  $R_f$  = 0.51 (EtOAc).  $[\alpha]_D = +69.5^\circ$  ( $c$  = 0.42,  $\text{CHCl}_3$ ). FTIR (neat):  $\tilde{\nu}$  = 3518, 3470, 2956, 2932, 1703, 1380, 1282, 1144, 1026, 900, 813, 758, 651  $\text{cm}^{-1}$ .  $^1\text{H}$  NMR (400 MHz,  $\text{CDCl}_3$ )  $\delta$  = 5.49-5.41 (m, 1H), 4.20 (dd,  $J$  = 13.3, 3.5 Hz, 1H), 3.29 (dd,  $J$  = 4.0, 2.0 Hz, 1H), 3.16 (d,  $J$  = 2.0 Hz, 1H), 3.01 (d,  $J$  = 3.9 Hz, 1H), 2.98 (dd,  $J$  = 9.6, 7.3 Hz, 1H), 2.59 (dd,  $J$  = 16.9, 4.9 Hz, 1H), 2.51 (ddd,  $J$  = 15.6, 7.3, 2.1 Hz, 1H), 2.45-2.36 (m, 2H), 2.15-1.98 (m, 4H), 2.07 (s, 3H), 1.95 (s, 3H), 1.89 (s, 3H), 1.86-1.79 (m, 1H), 1.77-1.70 (m, 1H), 1.58-1.21 (m, 8H), 1.31 (s, 3H), 1.08 (s, 3H), 0.94 (s, 3H).  $^{13}\text{C}$  NMR (101 MHz,  $\text{CDCl}_3$ )  $\delta$  = 208.89, 170.79, 166.12, 148.90, 122.19, 81.13, 75.20, 73.17, 67.58, 57.50, 56.59, 54.54, 52.54, 51.94, 44.11, 43.06, 40.43, 37.93, 35.72, 34.90, 31.83, 23.31, 21.99, 21.82, 21.48, 21.23, 20.71, 15.00, 13.90, 12.62. UPLC/MS:  $R_t$  = 1.785 min,  $m/z$  ( $\text{ES}^+$ ) 1061.5 ( $2\text{M} + \text{Na}^+$ ).

*Withanolide A: Synthesis and Structural Requirements for Neurite Outgrowth*

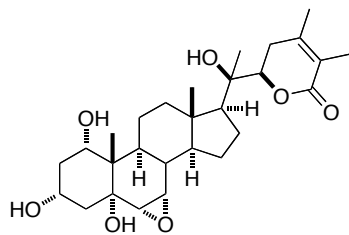

**Tetraol 21:** To a solution of  $\beta$ -hydroxy ketone **20** (30 mg, 0.061 mmol, 1.0 eq) in  $\text{CHCl}_3/\text{MeOH}$  (1.0 mL, 1:1) was added  $\text{NaBH}_4$  (9.5 mg, 0.246 mmol, 4 eq). After stirring for 1 h at RT the reaction mixture was quenched with 0.1 M HCl solution. Saturated aqueous Rochelle's solution (40 mL) and EtOAc (40 mL) were added to the mixture and stirred for 1 h. Then the layers were separated and the aqueous was extracted with EtOAc. The combined organic layers were dried over  $\text{Na}_2\text{SO}_4$  and evaporated. The residue was purified by column chromatography ( $\text{CH}_2\text{Cl}_2/\text{MeOH}$ , 25:1) to yield tetraol **21** (19.5 mg, 0.040 mmol, 65%) as a colorless solid. M.p. = 234-235 °C. TLC:  $R_f = 0.22$  ( $\text{CH}_2\text{Cl}_2/\text{MeOH}$ , 25:1).  $[\alpha]_D = +38.0^\circ$  ( $c = 0.27$ ,  $\text{CHCl}_3$ ). FTIR (neat):  $\tilde{\nu} = 3551, 2943, 1705, 1440, 1382, 1305, 1106, 1093, 910, 843, 746 \text{ cm}^{-1}$ .  $^1\text{H NMR}$  (400 MHz,  $\text{CDCl}_3$ )  $\delta = 4.21$  (dd,  $J = 13.3, 3.5 \text{ Hz}$ , 1H), 4.18-4.12 (m, 1H), 3.85 (s, 1H), 3.78 (d,  $J = 10.7 \text{ Hz}$ , 1H), 3.67 (d,  $J = 9.0 \text{ Hz}$ , 1H), 3.62 (ddd,  $J = 10.7, 4.4, 2.0 \text{ Hz}$ , 1H), 3.33 (dd,  $J = 3.9, 2.3 \text{ Hz}$ , 1H), 2.98 (d,  $J = 3.8 \text{ Hz}$ , 1H), 2.44-2.33 (m, 2H), 2.31-2.23 (m, 1H), 2.18-1.99 (m, 6H), 1.95 (s, 3H), 1.89 (s, 3H), 1.87-1.74 (m, 3H), 1.66-1.28 (m, 10H), 0.95 (s, 3H), 0.77 (s, 3H).  $^{13}\text{C NMR}$  (101 MHz,  $\text{CDCl}_3$ )  $\delta = 166.11, 148.88, 122.20, 81.11, 75.21, 73.98, 71.90, 66.82, 58.23, 57.93, 54.46, 51.93, 44.46, 40.69, 40.10, 38.44, 36.89, 35.15, 31.77, 23.13, 22.16, 21.22, 20.70, 19.91, 16.40, 13.88, 12.62$ . UPLC/MS:  $R_t = 1.612 \text{ min}$ ,  $m/z$  ( $\text{ES}^+$ ) 981.6 ( $2\text{M} + \text{H}^+$ ).

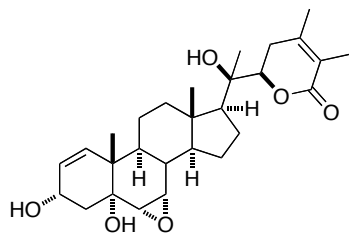

**Allylic alcohol 22:** A solution of epoxy ketone **18** (100 mg, 0.21 mmol, 1.0 eq) in  $\text{MeOH}/\text{CH}_2\text{Cl}_2$  (4.0 mL, 1:1) was cooled to 0 °C, and hydrazine hydrate (100  $\mu\text{l}$ , 2.1 mmol, 10.0 eq) was added dropwise. After stirring for 15 min, AcOH (50  $\mu\text{L}$ ) was added dropwise and the reaction mixture was stirred for additional 15 min at 0 °C. Then the reaction mixture was allowed to come to RT and stirred for 3 h. The slightly yellow solution was diluted with  $\text{CH}_2\text{Cl}_2$  and quenched with saturated aqueous  $\text{NaHCO}_3$ . The mixture was extracted with  $\text{CH}_2\text{Cl}_2$ , dried over  $\text{Na}_2\text{SO}_4$  and concentrated under reduced pressure. The residue was subjected to flash column chromatography (EtOAc/pentane, 1:1 to 2:1) to give allylic alcohol **22** (59 mg, 0.13 mmol, 61%) as a colorless solid. M.p. =

*Withanolide A: Synthesis and Structural Requirements for Neurite Outgrowth*

248-249 °C. TLC:  $R_f = 0.51$  (EtOAc).  $[\alpha]_D = -7.0^\circ$  ( $c = 0.5$ ,  $\text{CHCl}_3$ ). FTIR (neat):  $\tilde{\nu} = 3495, 2939, 1700, 1384, 1318, 1092, 1029, 895, 748, 644 \text{ cm}^{-1}$ .  $^1\text{H NMR}$  (400 MHz,  $\text{CDCl}_3$ )  $\delta = 5.87\text{-}5.80$  (m, 2H), 4.20 (dd,  $J = 13.3, 3.5 \text{ Hz}$ , 1H), 4.16-4.09 (m, 1H), 3.35 (d,  $J = 11.2 \text{ Hz}$ , 1H), 3.33-3.28 (m, 1H), 3.22 (d,  $J = 1.6 \text{ Hz}$ , 1H), 3.09 (d,  $J = 3.8 \text{ Hz}$ , 1H), 2.45-2.25 (m, 3H), 2.21-2.00 (m, 4H), 1.95 (s, 3H), 1.89 (s, 3H), 1.87-1.74 (m, 2H), 1.68-1.54 (m, 2H), 1.52-1.34 (m, 5H), 1.31 (s, 3H), 1.29-1.20 (m, 1H), 0.95 (s, 3H), 0.92 (s, 3H).  $^{13}\text{C NMR}$  (101 MHz,  $\text{CDCl}_3$ )  $\delta = 166.13, 148.91, 132.74, 128.48, 122.21, 81.13, 75.21, 70.14, 64.81, 57.93, 57.57, 54.45, 51.80, 44.35, 40.85, 40.23, 38.61, 36.35, 35.50, 31.85, 23.16, 22.21, 21.27, 21.16, 20.72, 13.87, 12.62$ . HRMS (ESI) Exact mass calculated for  $\text{C}_{28}\text{H}_{41}\text{O}_6^+$   $[\text{M}+\text{H}]^+$ : 473.2898, found: 473.2890. For X-ray analysis see section IV.

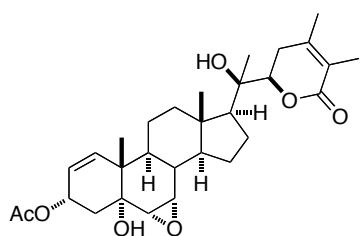

**Acetate 23:** To a solution of allylic alcohol **22** (6 mg, 0.013 mmol, 1.0 eq) in  $\text{CH}_2\text{Cl}_2$  (0.1 mL) was added acetic anhydride (4.8  $\mu\text{L}$ , 0.052 mmol, 4 eq), DMAP (0.16 mg, 0.001 mmol, 0.1 eq), and  $\text{Et}_3\text{N}$  (5.4  $\mu\text{L}$ , 0.039 mmol, 3 eq). The colorless solution was stirred at RT for 45 min, then quenched with 0.1 M HCl and extracted with  $\text{CH}_2\text{Cl}_2$ . The organic phase was dried over  $\text{Na}_2\text{SO}_4$  and evaporated. The residue was purified by column chromatography (pentane/EtOAc, 1:1) affording acetate **23** (5.7 mg, 0.011 mmol, 87%) as a colorless solid. M.p. = 245-246 °C. TLC:  $R_f = 0.60$  (EtOAc).  $[\alpha]_D = -4.3^\circ$  ( $c = 0.29$ ,  $\text{CHCl}_3$ ). FTIR (neat):  $\tilde{\nu} = 3502, 2922, 2324, 1718, 1462, 1374, 1310, 1248, 1139, 1100, 1015, 970, 891, 813, 754 \text{ cm}^{-1}$ .  $^1\text{H NMR}$  (400 MHz,  $\text{CDCl}_3$ )  $\delta = 6.07$  (dd,  $J = 10.2, 1.7 \text{ Hz}$ , 1H), 5.75-5.69 (m, 1H), 5.45-5.39 (m, 1H), 4.20 (dd,  $J = 13.4, 3.5 \text{ Hz}$ , 1H), 3.31 (dd,  $J = 3.8, 2.4 \text{ Hz}$ , 1H), 3.08 (d,  $J = 1.6 \text{ Hz}$ , 1H), 3.05 (d,  $J = 3.8 \text{ Hz}$ , 1H), 2.47-2.30 (m, 3H), 2.10 (s, 3H), 2.19-2.00 (m, 4H), 1.95 (s, 3H), 1.89 (s, 3H), 1.87-1.75 (m, 2H), 1.68-1.51 (m, 2H), 1.42 (m, 5H), 1.32 (s, 3H), 1.26-1.19 (m, 1H), 0.96 (s, 3H), 0.92 (s, 3H).  $^{13}\text{C NMR}$  (101 MHz,  $\text{CDCl}_3$ )  $\delta = 170.99, 166.13, 148.87, 136.29, 124.39, 122.22, 81.14, 75.22, 67.89, 65.88, 57.68, 57.26, 54.38, 51.81, 44.37, 40.77, 40.32, 37.15, 36.15, 35.40, 31.91, 23.16, 22.19, 21.67, 21.33, 21.13, 20.71, 20.61, 13.83, 12.62$ . HRMS (ESI) Exact mass calculated for  $\text{C}_{30}\text{H}_{43}\text{O}_7^+$   $[\text{M}+\text{H}]^+$ : 515.3003, found: 515.2987.

*Withanolide A: Synthesis and Structural Requirements for Neurite Outgrowth*

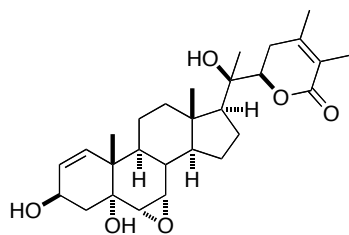

**Allylic alcohol 24:** A stirred mixture of allylic alcohol **22** (10.0 mg, 0.021 mmol, 1.0 eq), 4-nitrobenzoic acid (14.4 mg, 0.085 mmol, 4.0 eq) and PPh<sub>3</sub> (21.1 mg, 0.080 mmol, 3.8 eq) in CH<sub>2</sub>Cl<sub>2</sub> (0.2 mL) was cooled to 0 °C. To the cold solution was added DEAD (17.1 mg, 0.095 mmol, 4.5 eq), and the mixture was stirred at RT overnight. The solvent was removed under reduced pressure and the residue subjected to flash column chromatography (pentane/EtOAc, 1:1) to yield the 4-nitrobenzoate (8.7 mg, 0.014 mmol, 66%) as a yellowish solid. TLC: *R<sub>f</sub>* = 0.79 (EtOAc, 1:1). <sup>1</sup>H NMR (400 MHz, CDCl<sub>3</sub>) δ = 8.33-8.17 (m, 5H), 6.03 (dd, *J* = 10.3, 1.8 Hz, 1H), 5.98-5.91 (m, 1H), 5.77 – 5.70 (m, 1H), 4.21 (dd, *J* = 13.3, 3.5 Hz, 1H), 3.33 (dd, *J* = 3.8, 2.5 Hz, 1H), 3.17 (d, *J* = 1.5 Hz, 1H), 3.08 (d, *J* = 3.8 Hz, 1H), 2.57-2.46 (m, 1H), 2.46-2.31 (m, 2H), 2.28-1.98 (m, 5H), 1.96 (s, 3H), 1.89 (s, 3H), 1.87-1.77 (m, 2H), 1.52-1.34 (m, 6H), 1.32 (s, 3H), 1.12 (s, 3H), 0.97 (s, 3H).

To a solution of 4-nitrobenzoate (8.7 mg, 0.014 mmol, 1 eq) in THF/CH<sub>2</sub>Cl<sub>2</sub> (0.4 mL, 1:1) was added 5% aqueous NaOH solution (0.2 mL) and tetrabutylammonium hydroxide solution (7 μL, 1 M in methanol) and the mixture was stirred at RT for 2 h. The mixture was then diluted with CH<sub>2</sub>Cl<sub>2</sub> and washed with 1 M HCl and water. The organic phase was dried over Na<sub>2</sub>SO<sub>4</sub>, evaporated and the residue subjected to flash column chromatography (EtOAc) to yield allylic alcohol **24** (5.0 mg, 0.011 mmol, 76%) as a colorless solid. M.p. = 240 °C (decomposed). TLC: *R<sub>f</sub>* = 0.27 (pentane/EtOAc, 1:1). [*α*]<sub>D</sub> = +39.1° (*c* = 0.25, CHCl<sub>3</sub>). FTIR (neat):  $\tilde{\nu}$  = 3475, 2925, 1696, 1453, 1384, 1139, 1098, 1061, 1022, 923, 817, 763, 610 cm<sup>-1</sup>. <sup>1</sup>H NMR (400 MHz, CDCl<sub>3</sub>) δ = 5.85 (dd, *J* = 10.3, 1.8 Hz, 1H), 5.67 (ddd, *J* = 10.1, 2.8, 1.1 Hz, 1H), 4.75-4.63 (m, 1H), 4.20 (dd, *J* = 13.4, 3.5 Hz, 1H), 3.30 (dd, *J* = 3.8, 2.5 Hz, 1H), 3.10 (d, *J* = 1.6 Hz, 1H), 3.06 (d, *J* = 3.9 Hz, 1H), 2.46-2.24 (m, 3H), 2.19-1.98 (m, 4H), 1.95 (s, 3H), 1.89 (s, 3H), 1.86-1.72 (m, 3H), 1.68-1.52 (m, 3H), 1.50-1.33 (m, 5H), 1.31 (s, 3H), 1.05 (s, 3H), 0.95 (s, 3H). <sup>13</sup>C NMR (101 MHz, CDCl<sub>3</sub>) δ = 166.15, 148.91, 133.69, 128.84, 122.21, 81.15, 75.22, 71.52, 66.75, 57.92, 57.73, 54.43, 51.79, 44.42, 41.01, 40.28, 39.87, 36.02, 35.34, 31.88, 23.13, 22.71, 22.19, 21.29, 20.75, 20.71, 13.87, 12.62. HRMS (ESI) Exact mass calculated for C<sub>28</sub>H<sub>41</sub>O<sub>6</sub><sup>+</sup> [M+H]<sup>+</sup>: 473.2898, found: 473.2885.

*Withanolide A: Synthesis and Structural Requirements for Neurite Outgrowth*

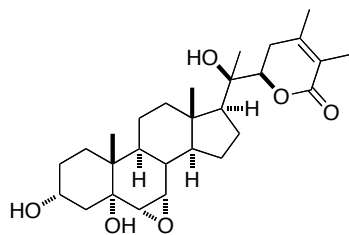

**Alcohol 25:** Allylic alcohol **22** (5.0 mg, 0.011 mmol, 1.0 eq) and Crabtree's catalyst (0.17 mg, 2 mol%) were dissolved in CH<sub>2</sub>Cl<sub>2</sub> (0.1 mL) in a small vial. The vial was placed in an autoclave and the mixture was stirred at RT for 2.5 h under a H<sub>2</sub> atmosphere (10 bar). The

solvent was removed, the residue filtered through a short pad of silica (EtOAc) and evaporated to yield alcohol **25** (5.0 mg, 0.011 mmol, quant.) as a colorless solid. M.p. = 205-206°C. TLC:  $R_f = 0.52$  (EtOAc).  $[\alpha]_D^{25} = +19.1^\circ$  ( $c = 0.36$ , CHCl<sub>3</sub>). FTIR (neat):  $\tilde{\nu} = 3475, 2922, 1705, 1382, 1142, 1102, 1024, 895, 855, 811, 759, 652 \text{ cm}^{-1}$ . <sup>1</sup>H NMR (400 MHz, CDCl<sub>3</sub>)  $\delta = 4.53$  (d,  $J = 9.7$  Hz, 1H), 4.21 (d,  $J = 9.8$  Hz, 1H), 4.04-3.93 (m, 1H), 3.35 (s, 1H), 3.31-3.24 (m, 1H), 2.95 (d,  $J = 3.8$  Hz, 1H), 2.46-2.31 (m, 2H), 2.17 (s, 1H), 2.14-1.97 (m, 3H), 1.95 (s, 3H), 1.92-1.90 (m, 1H), 1.89 (s, 3H), 1.85-1.65 (m, 5H), 1.50 (t,  $J = 9.5$  Hz, 1H), 1.44-1.33 (m, 3H), 1.30 (s, 3H), 1.28-1.04 (m, 5H), 0.92 (s, 3H), 0.81 (s, 3H). <sup>13</sup>C NMR (101 MHz, CDCl<sub>3</sub>)  $\delta = 166.15, 148.94, 122.19, 81.10, 75.23, 71.60, 67.11, 58.07, 57.92, 54.48, 51.83, 44.31, 40.25, 38.44, 38.23, 37.94, 35.15, 31.78, 29.25, 24.29, 23.08, 22.22, 21.16, 20.72, 20.18, 14.56, 13.87, 12.62$ . HRMS (ESI) Exact mass calculated for C<sub>28</sub>H<sub>43</sub>O<sub>6</sub><sup>+</sup> [M+H]<sup>+</sup>: 475.3054, found: 475.3042.

**General Procedure A for oxime ethers 26-30**

To a solution of withanolide A (1.0 eq) in pyridine was added the hydroxylamine hydrochloride (2.0 eq) and the mixture was heated at 70 °C for the indicated time. The solvent was removed under high vacuum, and the residue dissolved in CH<sub>2</sub>Cl<sub>2</sub>. Saturated aqueous NH<sub>4</sub>Cl solution was added and the aqueous phase was extracted with CH<sub>2</sub>Cl<sub>2</sub>. The organic phase was dried over Na<sub>2</sub>SO<sub>4</sub>, evaporated, and the residue subjected to flash column chromatography to yield oxime ethers **26-30** as colorless solids.

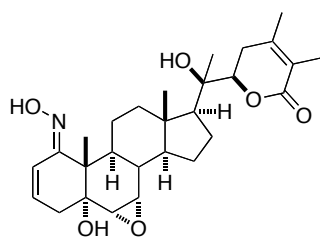

**Hydroxylamine 26:** Following General Procedure A: Withanolide A **1** (20 mg, 0.04 mmol, 1.0 eq) in pyridine (0.50 mL), hydroxylamine hydrochloride (5.9 mg, 0.08 mmol, 2.0 eq), 70 °C for 20 h. Additional hydroxylamine hydrochloride (3.0 mg, 0.04 mmol, 1.0 eq), 70 °C



*Withanolide A: Synthesis and Structural Requirements for Neurite Outgrowth*

for 5 h, flash column chromatography (pentane/EtOAc, 1:1), 58% yield. M.p. = 180-181 °C. TLC:  $R_f = 0.55$  (EtOAc).  $[\alpha]_D = +175.0^\circ$  ( $c = 0.69$ ,  $\text{CHCl}_3$ ). FTIR (neat):  $\tilde{\nu} = 3417, 2922, 2360, 1691, 1382, 1290, 1023, 907, 815, 750, 645 \text{ cm}^{-1}$ .  $^1\text{H}$  NMR (400 MHz,  $\text{CDCl}_3$ )  $\delta = 7.19$  (s, 1H), 6.75 (ddd,  $J = 10.3, 2.9, 1.2$  Hz, 1H), 6.02 (ddd,  $J = 10.3, 4.7, 2.5$  Hz, 1H), 4.21 (dd,  $J = 13.3, 3.5$  Hz, 1H), 3.30 (dd,  $J = 4.0, 2.1$  Hz, 1H), 3.01 (d,  $J = 3.9$  Hz, 1H), 2.98 (d,  $J = 1.5$  Hz, 1H), 2.73-2.66 (m, 1H), 2.53-2.33 (m, 4H), 2.17-2.08 (m, 1H), 2.03-1.97 (m, 1H), 1.95 (s, 3H), 1.88 (s, 3H), 1.87-1.77 (m, 2H), 1.64-1.32 (m, 8H), 1.30 (s, 3H), 1.08 (s, 3H), 0.96 (s, 3H).  $^{13}\text{C}$  NMR (101 MHz,  $\text{CDCl}_3$ )  $\delta = 166.21, 159.55, 149.01, 131.00, 122.12, 117.81, 81.14, 75.24, 71.42, 57.43, 56.82, 54.61, 52.39, 45.37, 44.02, 40.52, 37.42, 36.70, 35.43, 31.79, 23.33, 22.85, 22.07, 21.15, 20.72, 15.98, 14.07, 12.61$ . HRMS (ESI) Exact mass calculated for  $\text{C}_{28}\text{H}_{40}\text{NO}_6^+$   $[\text{M}+\text{H}]^+$ : 486.2850, found: 486.2839.

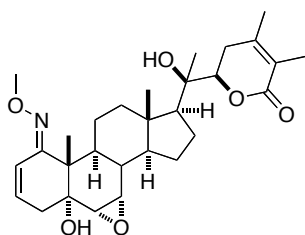

**Methyloxime 27:** Following General Procedure A: Withanolide A **1** (10 mg, 0.02 mmol, 1.0 eq) in pyridine (0.25 mL), methoxylamine hydrochloride (3.6 mg, 0.04 mmol, 2.0 eq), 70 °C for 3 h. Additional methoxylamine hydrochloride (1.8 mg, 0.02 mmol, 1.0 eq), 70 °C for

2 d, flash column chromatography (pentane/EtOAc, 1:1), 58% yield (as an inseparable diastereomeric mixture). M.p. = 157-158 °C. TLC:  $R_f = 0.81$  (EtOAc).  $[\alpha]_D = +217.1^\circ$  ( $c = 0.18$ ,  $\text{CHCl}_3$ ). FTIR (neat):  $\tilde{\nu} = 3500, 2937, 2325, 1702, 1463, 1381, 1289, 1187, 1130, 1046, 896, 829, 733, 683, 614 \text{ cm}^{-1}$ .  $^1\text{H}$  NMR (400 MHz,  $\text{CDCl}_3$ )  $\delta = 6.67$ -6.60 (m, 1H), 6.01-5.94 (m, 1H), 4.21 (dd,  $J = 13.3, 3.5$  Hz, 1H), 3.87 and 3.84 (s, 3H), 3.30 (dd,  $J = 4.0, 2.1$  Hz, 1H), 3.00 (d,  $J = 3.9$  Hz, 1H), 2.95 (d,  $J = 1.5$  Hz, 1H), 2.93-2.85 (m, 1H), 2.51-2.30 (m, 4H), 2.17-1.98 (m, 3H), 1.95 (s, 3H), 1.89 (s, 3H), 1.87-1.77 (m, 1H), 1.67-1.34 (m, 8H), 1.32 (s, 3H), 1.12 and 1.07 (s, 3H, diastereomers), 0.97 (s, 3H).  $^{13}\text{C}$  NMR (101 MHz,  $\text{CDCl}_3$ )  $\delta = 166.19, 157.97, 148.89, 130.78, 122.19, 118.30, 81.17, 75.25, 71.31, 61.81, 57.46, 56.86, 54.60, 52.36, 45.19, 44.02, 40.63, 37.41, 36.74, 35.41, 31.87, 23.38, 22.74, 22.02, 21.24, 20.71, 16.10, 14.00, 12.62$ . HRMS (ESI) Exact mass calculated for  $\text{C}_{29}\text{H}_{42}\text{NO}_6^+$   $[\text{M}+\text{H}]^+$ : 500.3007, found: 500.2996.



*Withanolide A: Synthesis and Structural Requirements for Neurite Outgrowth*

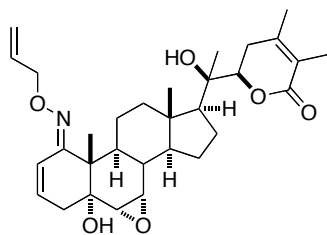

**Allyloxime 28:** Following General Procedure A: Withanolide A **1** (50 mg, 0.11 mmol, 1.0 eq) in pyridine (1.25 mL), *O*-allylhydroxylamine hydrochloride (23.3 mg, 0.21 mmol, 2.0 eq), 70 °C for 14 h. Additional *O*-allylhydroxylamine hydrochloride (11.7 mg, 0.11 mmol, 1.0 eq), 70 °C for 14 h, flash column chromatography

(pentane/EtOAc, 1:1), 72% yield. M.p. = 117-118 °C. TLC:  $R_f$  = 0.75 (EtOAc).  $[\alpha]_D = +218.3^\circ$  ( $c$  = 0.24, CHCl<sub>3</sub>). FTIR (neat):  $\tilde{\nu}$  = 3506, 2925, 1702, 1382, 1289, 1131, 1097, 1025, 906, 826, 664 cm<sup>-1</sup>. <sup>1</sup>H NMR (400 MHz, CDCl<sub>3</sub>)  $\delta$  = 6.73-6.62 (m, 1H), 6.03-5.90 (m, 2H), 5.27-5.20 (m, 1H), 5.17-5.11 (m, 1H), 4.61-4.45 (m, 2H), 4.20 (dd,  $J$  = 13.3, 3.5 Hz, 1H), 3.29 (dd,  $J$  = 4.0, 2.1 Hz, 1H), 2.99 (d,  $J$  = 3.9 Hz, 1H), 2.94 (s, 1H), 2.89-2.79 (m, 1H), 2.51-2.28 (m, 4H), 2.18-1.97 (m, 4H), 1.94 (s, 3H), 1.88 (s, 3H), 1.88-1.74 (m, 2H), 1.60-1.38 (m, 5H), 1.31 (s, 3H), 1.29-1.23 (m, 1H), 1.06 (s, 3H), 0.96 (s, 3H). <sup>13</sup>C NMR (101 MHz, CDCl<sub>3</sub>)  $\delta$  = 166.16, 158.08, 148.88, 134.84, 130.73, 122.13, 118.43, 117.22, 81.15, 75.20, 74.86, 71.29, 57.43, 56.82, 54.55, 52.35, 45.27, 44.01, 40.57, 37.37, 36.74, 35.38, 31.83, 23.34, 22.74, 21.99, 21.21, 20.68, 16.07, 13.97, 12.59. HRMS (ESI) Exact mass calculated for C<sub>31</sub>H<sub>44</sub>NO<sub>6</sub><sup>+</sup> [M+H]<sup>+</sup>: 526.3163, found: 526.3148.

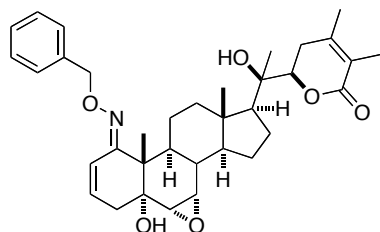

**Benzylloxime 29:** Following General Procedure A: Withanolide A **1** (10 mg, 0.02 mmol, 1.0 eq) in pyridine (0.25 mL), *O*-benzylhydroxylamine hydrochloride (6.8 mg, 0.04 mmol, 2.0 eq), 70 °C for 14 h. Additional *O*-benzylhydroxylamine hydrochloride (3.4 mg, 0.02 mmol, 1.0 eq), 70 °C for 14 h, flash column chromatography

(pentane/EtOAc, 2:1), 63% yield (as an inseparable diastereomeric mixture). M.p. = 106-107 °C. TLC:  $R_f$  = 0.79 (EtOAc).  $[\alpha]_D = +174.0^\circ$  ( $c$  = 0.37, CHCl<sub>3</sub>). FTIR (neat):  $\tilde{\nu}$  = 3485, 2922, 2361, 1703, 1455, 1381, 1289, 1212, 1131, 1095, 1019, 906, 815, 753, 698, 613 cm<sup>-1</sup>. <sup>1</sup>H NMR (400 MHz, CDCl<sub>3</sub>)  $\delta$  = 7.39-7.27 (m, 5H), 6.75-6.68 (m, 1H), 6.01-5.93 (m, 1H), 5.16-5.01 (m, 2H), 4.26-4.17 (m, 1H), 3.32-3.27 (m, 1H), 3.00 (d,  $J$  = 3.9 Hz, 1H), 2.95 (d,  $J$  = 1.4 Hz, 1H), 2.84-2.77 (m, 1H), 2.52-2.29 (m, 4H), 2.17-1.98 (m, 3H), 1.96 (s, 3H), 1.90 (s, 3H), 1.85-1.74 (m, 2H), 1.63-1.36 (m, 6H), 1.33 (s, 3H), 1.32-1.29 (m, 1H), 1.08 and 1.05 (s, 3H, diastereomers), 0.96 and

*Withanolide A: Synthesis and Structural Requirements for Neurite Outgrowth*

0.95 (s, 3H, diastereomers).  $^{13}\text{C}$  NMR (101 MHz,  $\text{CDCl}_3$ )  $\delta$  = 166.18, 158.33, 148.90, 138.50, 130.76, 128.33, 128.30, 127.65, 122.20, 118.64, 81.18, 75.99, 75.26, 71.35, 57.46, 56.86, 54.60, 52.40, 45.33, 44.06, 40.63, 37.41, 36.77, 35.43, 31.88, 23.36, 22.77, 22.04, 21.25, 20.72, 16.10, 14.02, 12.64. HRMS (ESI) Exact mass calculated for  $\text{C}_{35}\text{H}_{46}\text{NO}_6^+$   $[\text{M}+\text{H}]^+$ : 576.3320, found: 576.3323.

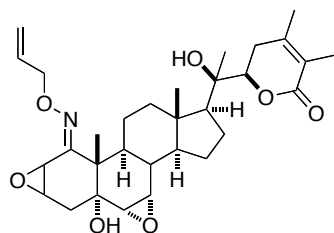

**Epoxy allyloxime 30:** To a solution of epoxy ketone **18** (5 mg, 0.01 mmol, 1.0 eq) in pyridine (0.15 mL) was added O-allylhydroxylamine hydrochloride (2.3 mg, 0.02 mmol, 2.0 eq) and the mixture was heated at 70 °C for 7 h. The solvent was removed under high vacuum, and

the residue dissolved in  $\text{CH}_2\text{Cl}_2$ . Saturated  $\text{NH}_4\text{Cl}$  solution was added and the aqueous phase was extracted with  $\text{CH}_2\text{Cl}_2$ . The organic phase was dried over  $\text{Na}_2\text{SO}_4$ , evaporated, and the residue subjected to flash column chromatography (pentane:EtOAc, 4:6) to yield the allylhydroxylamine **30** (2.7 mg, 0.005 mmol, 49%) as a colorless solid. M.p. = 109-110°C. TLC:  $R_f$  = 0.54 (EtOAc).  $[\alpha]_D^{25} = +126.7^\circ$  ( $c$  = 0.16,  $\text{CHCl}_3$ ). FTIR (neat):  $\tilde{\nu}$  = 3495, 2922, 2362, 1704, 1462, 1383, 1315, 1261, 1096, 1006, 919, 805, 754, 665  $\text{cm}^{-1}$ .  $^1\text{H}$  NMR (400 MHz,  $\text{CDCl}_3$ )  $\delta$  = 6.08-5.89 (m, 1H), 5.33-5.23 (m, 1H), 5.22-5.14 (m, 1H), 4.67-4.56 (m, 2H), 4.20 (dd,  $J$  = 13.3, 3.7 Hz, 1H), 3.93 (d,  $J$  = 3.7 Hz, 1H), 3.51 (t,  $J$  = 3.2 Hz, 1H), 3.24-3.10 (m, 1H), 2.94 (s, 1H), 2.90 (d,  $J$  = 3.8 Hz, 1H), 2.63 (d,  $J$  = 11.6 Hz, 1H), 2.47-2.30 (m, 2H), 2.22-2.00 (m, 5H), 1.95 (s, 3H), 1.89 (s, 3H), 1.76-1.63 (m, 3H), 1.46 (d,  $J$  = 19.6 Hz, 6H), 1.32 (s, 3H), 1.04 (s, 3H), 0.96 and 0.92 (s, 3H, diastereomers).  $^{13}\text{C}$  NMR (101 MHz,  $\text{CDCl}_3$ )  $\delta$  = 166.05, 155.33, 148.77, 134.37, 122.04, 117.63, 81.03, 75.29 and 75.11 (diastereomers), 70.35, 56.28, 55.69, 54.36, 52.17, 51.86, 46.97, 46.03, 43.87 and 43.79 (diastereomers), 40.22 and 40.07 (diastereomers), 35.74, 35.70, 35.30, 33.85, 31.74, 29.70, 23.21, 21.96 and 21.87 (diastereomers), 21.17, 20.58, 15.40, 13.75, 12.48. HRMS (ESI) Exact mass calculated for  $\text{C}_{31}\text{H}_{44}\text{NO}_7^+$   $[\text{M}+\text{H}]^+$ : 542.3112, found: 542.3099.

*Withanolide A: Synthesis and Structural Requirements for Neurite Outgrowth*

### III. $^1\text{H}$ and $^{13}\text{C}$ NMR spectra

#### Towards the Total Synthesis (Scheme 1)

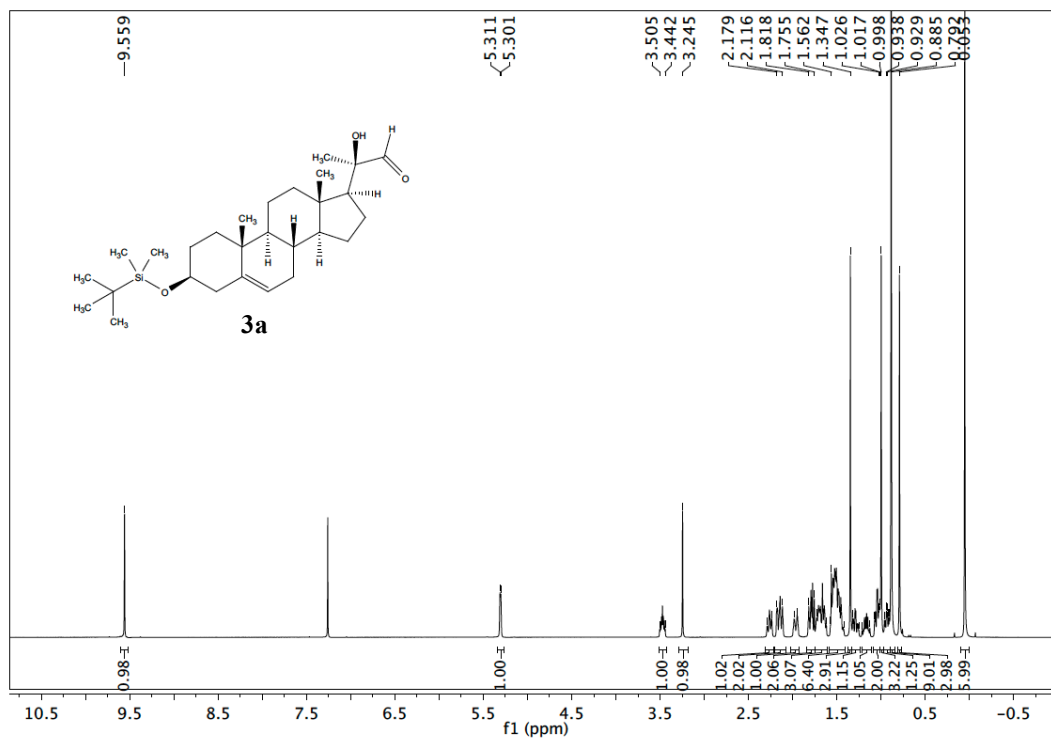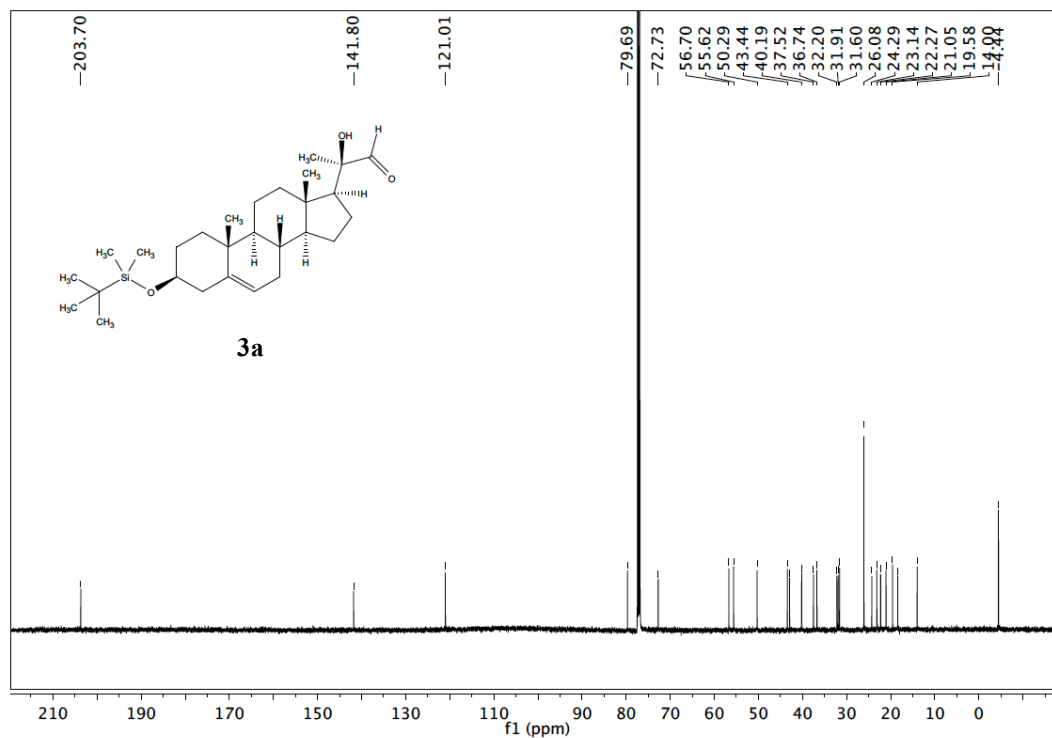

*Withanolide A: Synthesis and Structural Requirements for Neurite Outgrowth*

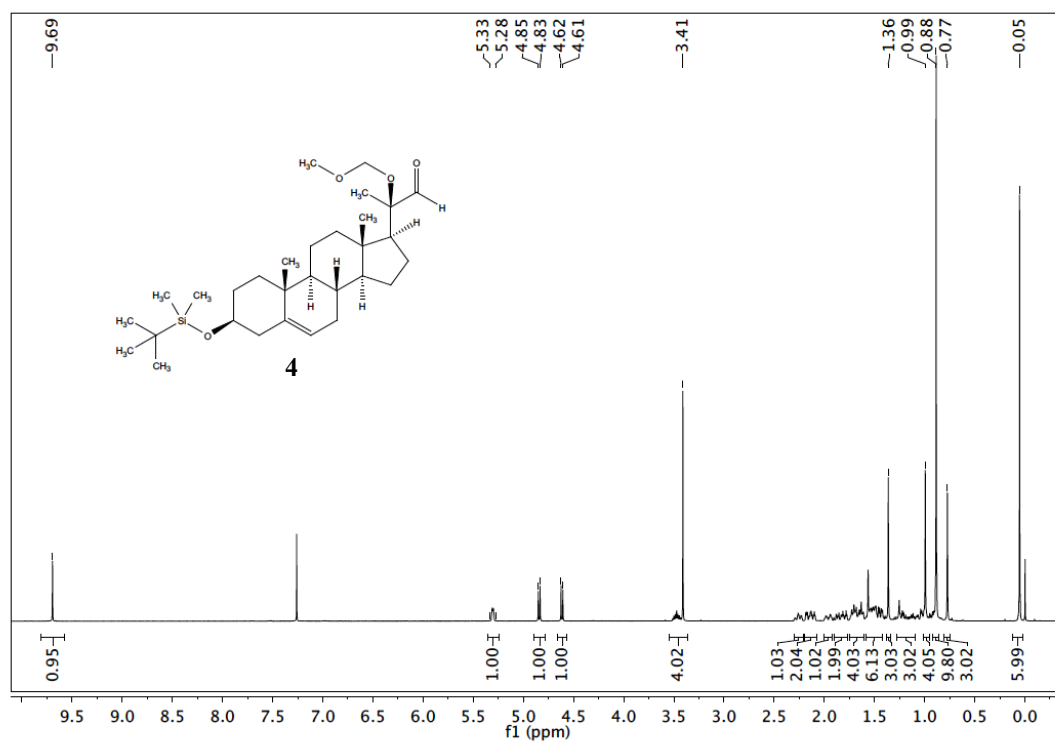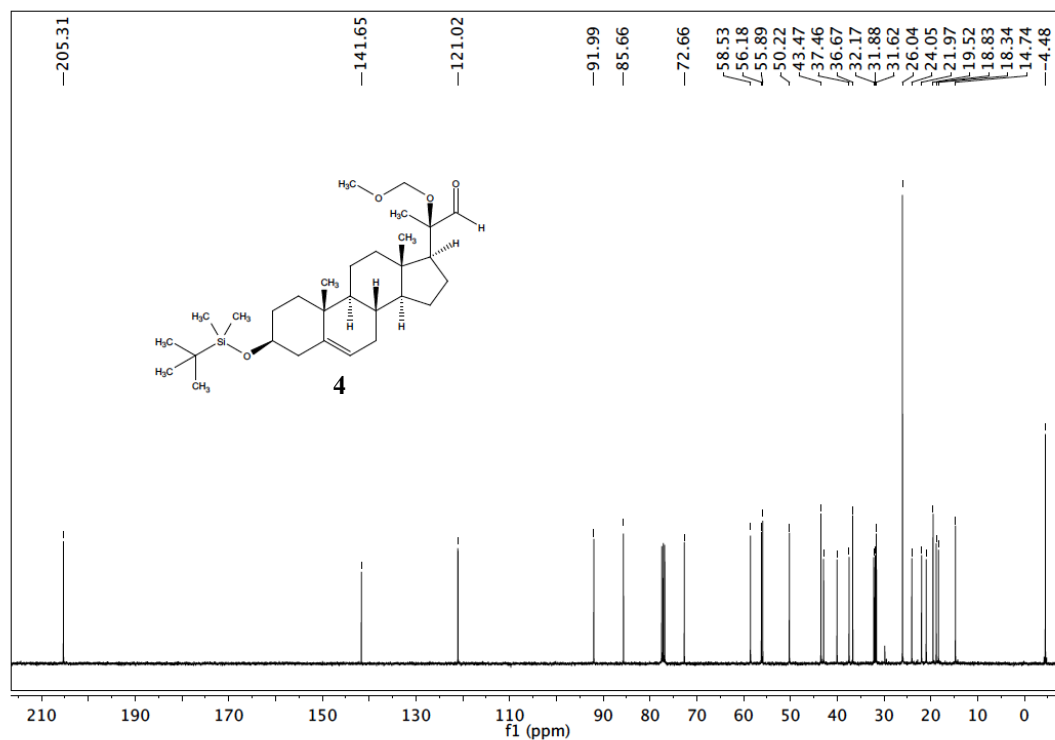

*Withanolide A: Synthesis and Structural Requirements for Neurite Outgrowth*

1/22/10 1:50 PM

TimePrinted:22/1/2010,13:39:32  
title:TW302 - pure  
user: <woods>  
filename: <TW302\_pure>/3  
pulprg: <zg>  
solvent: <CDCl3>  
NS: 32  
Frequency: 400.13MHz

http://128.178.43.68/cheminfo/servelet/org.cheminfo.hook.applet.hook/servelet

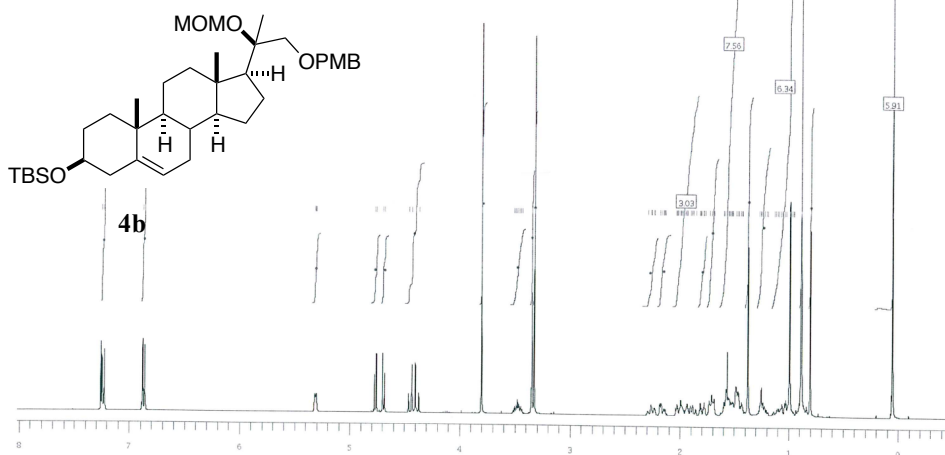

Page 1 of 1

1/22/10 1:52 PM

TimePrinted:22/1/2010,13:31:46  
title:TW302 - pure  
user: <woods>  
filename: <TW302\_pure>/4  
pulprg: <zg>  
solvent: <CDCl3>  
NS: 512  
Frequency: 100.612769MHz

http://128.178.43.68/cheminfo/servelet/org.cheminfo.hook.applet.hook/servelet

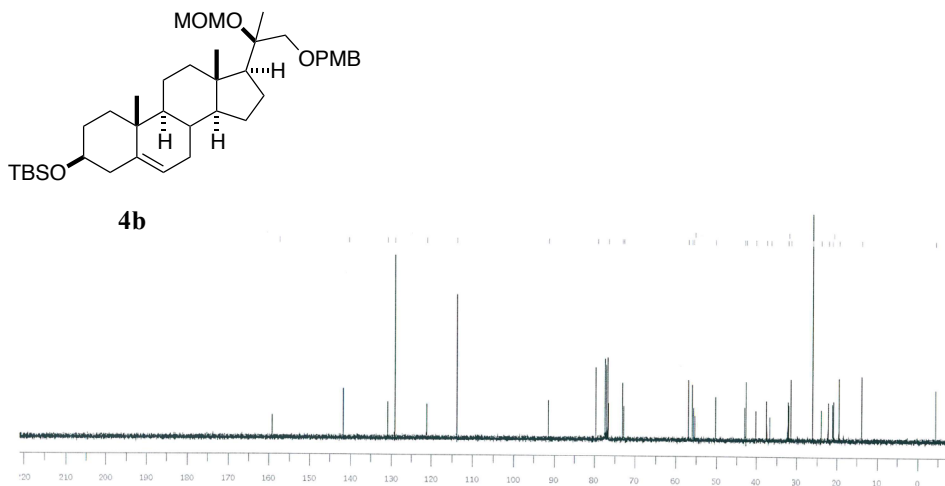

Page 1 of 1

*Withanolide A: Synthesis and Structural Requirements for Neurite Outgrowth*

1/22/10 3:16 PM

TimePrinted: 22/1/2010, 15:10:46  
file: TW312 - pure  
user: <woods>  
filename: <TW312\_pure>.1  
pulprog: <zg>  
solvent: <CDCl3>  
NS: 2  
Frequency: 400.13MHz

Page 1 of 1

<http://118.178.43.68/cheminfo/servelet/org.scheminfo.hookapplet.hookServlet>

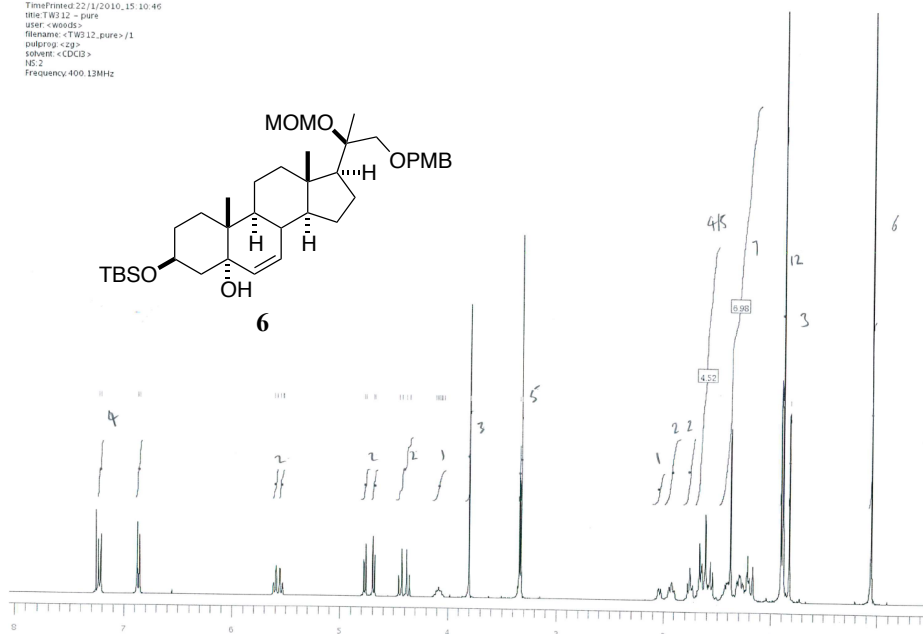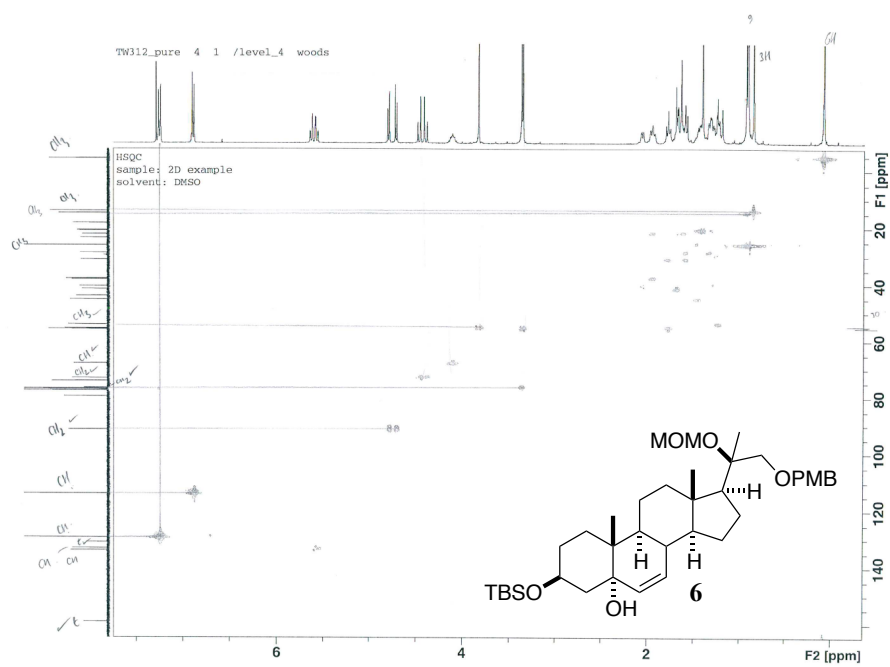

*Withanolide A: Synthesis and Structural Requirements for Neurite Outgrowth*

1/25/10 11:19 AM

TimePrinted: 25/1/2010, 11:10:52  
Title: TW315 - pure  
User: <woods>  
Filename: <TW315\_pure>/1  
Pulprog: <zgpg>  
Solvent: <CDCl3>  
NS: 15  
Frequency: 400.13MHz

Page 1 of 1

http://128.178.43.68/cheminfo/servelet/org.cheminfo.hook.applet.HookServlet

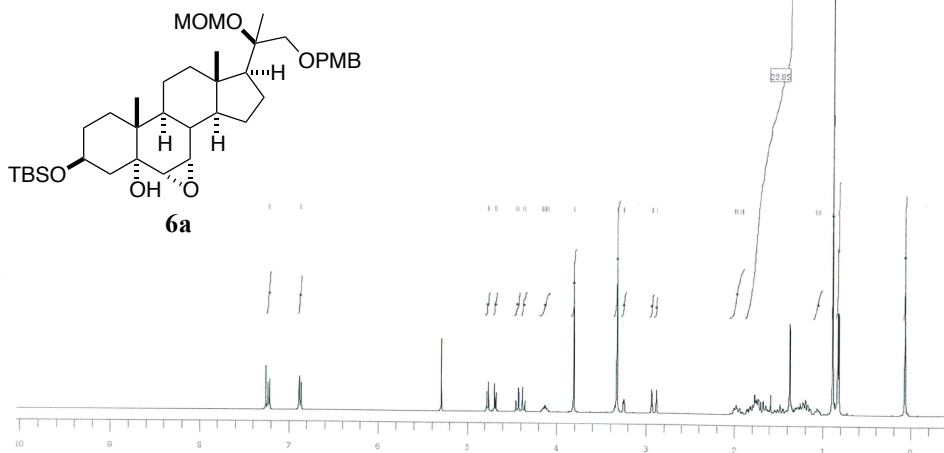

1/25/10 4:43 PM

TimePrinted: 25/1/2010, 16:40:21  
Title: TW315 - pure  
User: <woods>  
Filename: <TW315\_pure>/2  
Pulprog: <zgpg>  
Solvent: <CDCl3>  
NS: 189  
Frequency: 100.612769MHz

Page 1 of 1

http://128.178.43.68/cheminfo/servelet/org.cheminfo.hook.applet.HookServlet

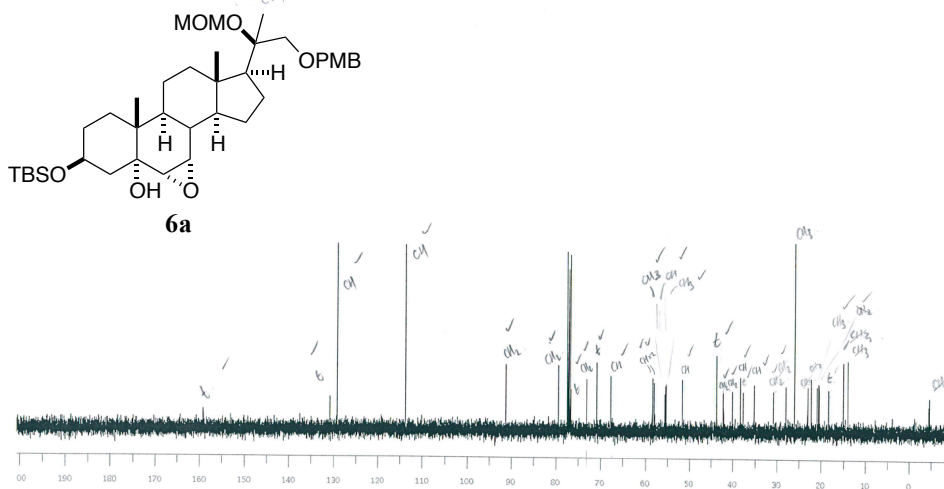





Withanolide A: Synthesis and Structural Requirements for Neurite Outgrowth

1/27/10 10:02 AM

Page 1 of 1

http://128.178.43.68/cheminfo/servelet/org.cheminfo.hook.appl.HookServlet

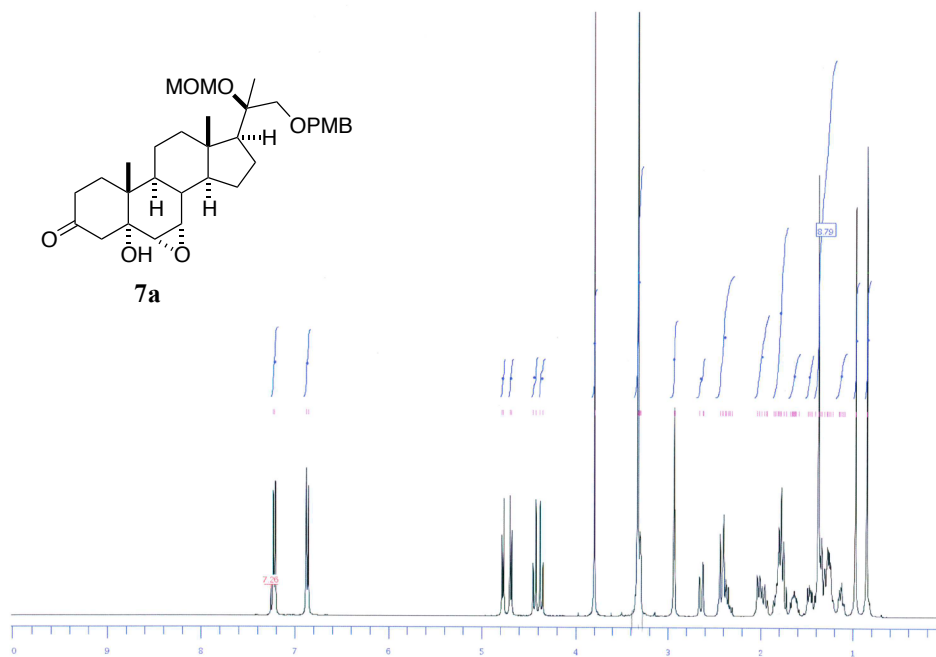

1/27/10 10:06 AM

Page 1 of 1

http://128.178.43.68/cheminfo/servelet/org.cheminfo.hook.appl.HookServlet

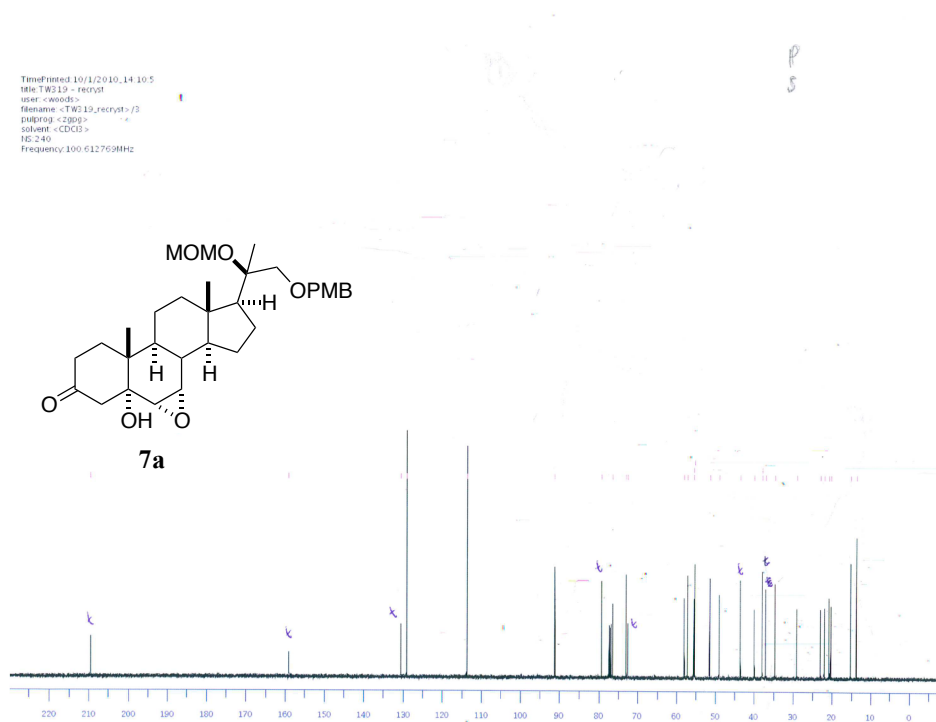

*Withanolide A: Synthesis and Structural Requirements for Neurite Outgrowth*

1/26/10 10:25 AM

TimePrinted: 26/1/2010, 10:15:43  
file: TW223 - pure  
user: <woods>  
filename: <TW223\_pure>/1  
pulsprog: <zgpg>  
solvent: <CDCl3>  
NS: 21  
Frequency: 400.13MHz

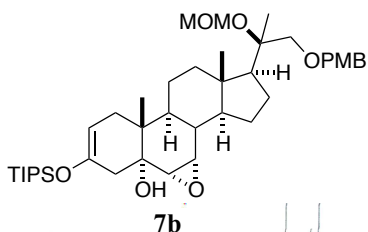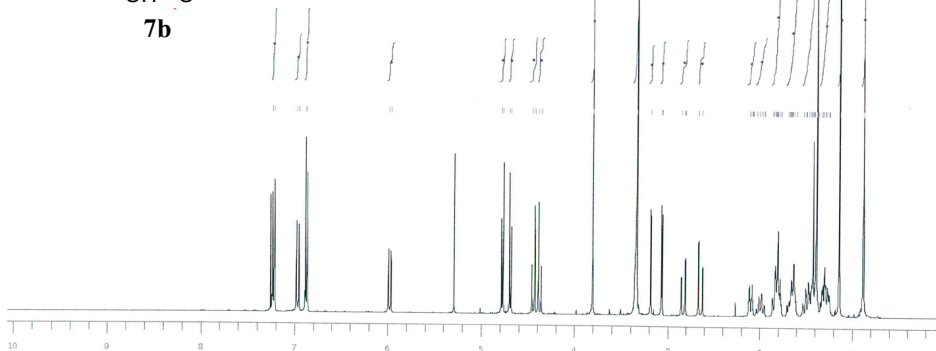

http://128.178.43.68/cheminfo/servelet/org/cheminfo/look\_appli/lookServlet

Page 1 of 1

1/26/10 10:56 AM

TimePrinted: 26/1/2010, 10:53:11  
file: TW223 - pure  
user: <woods>  
filename: <TW223\_pure>/2  
pulsprog: <zgpg>  
solvent: <CDCl3>  
NS: 128  
Frequency:

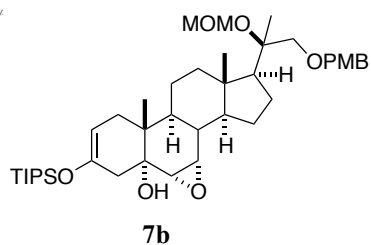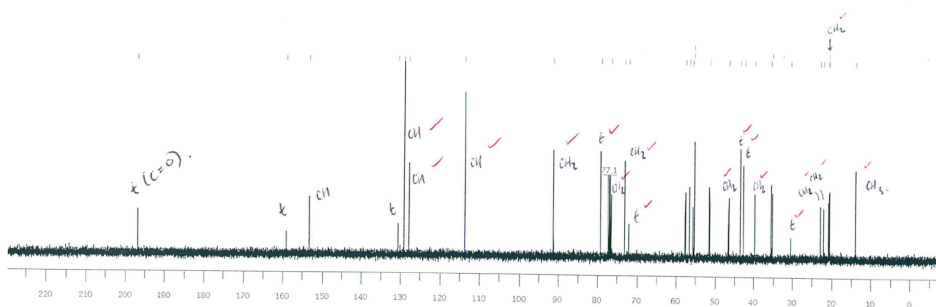

http://128.178.43.68/cheminfo/servelet/org/cheminfo/look\_appli/lookServlet

Page 1 of 1

*Withanolide A: Synthesis and Structural Requirements for Neurite Outgrowth*

1/26/10 11:37 AM

TimePrinted: 26/1/2010, 11:25:28  
Title: TW321 - pure  
User: cwoods  
Filename: <TW321\_pure>/1  
PulProg: <zgpg>  
Solvent: <CDCl3>  
NS: 32  
Frequency: 400.13MHz

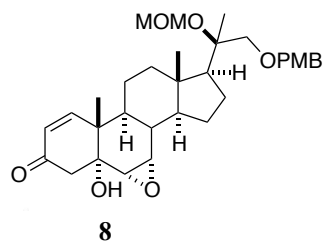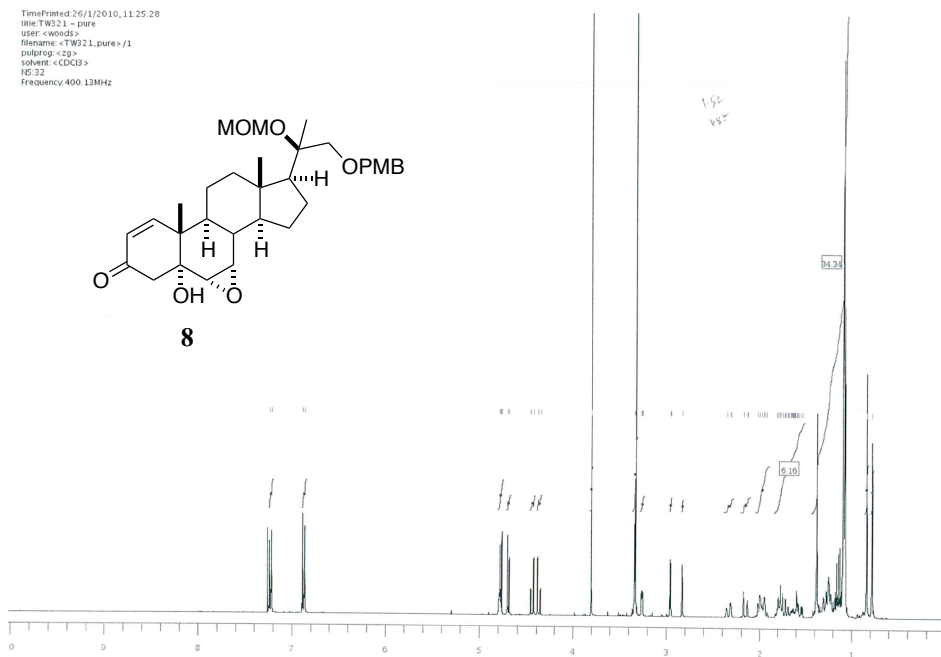

http://128.17.84.68/cheminfo/server/cheminfo.html#HoopServerlet

Page 1 of 1

1/26/10 12:47 PM

TimePrinted: 26/1/2010, 12:46:18  
Title: TW321 - pure  
User: cwoods  
Filename: <TW321\_pure>/3  
PulProg: <zgpg>  
Solvent: <CDCl3>  
NS: 275  
Frequency: 100.612769MHz

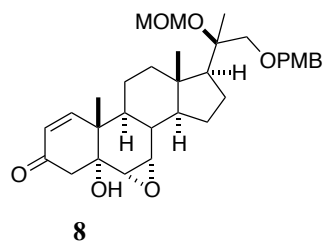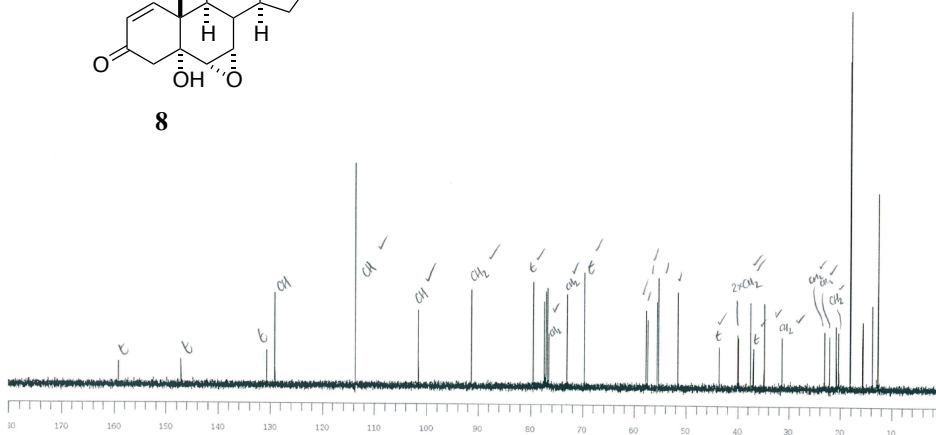

http://128.17.84.68/cheminfo/server/cheminfo.html#HoopServerlet

Page 1 of 1

*Withanolide A: Synthesis and Structural Requirements for Neurite Outgrowth*

Total Synthesis of Withanolide A (Scheme 2)

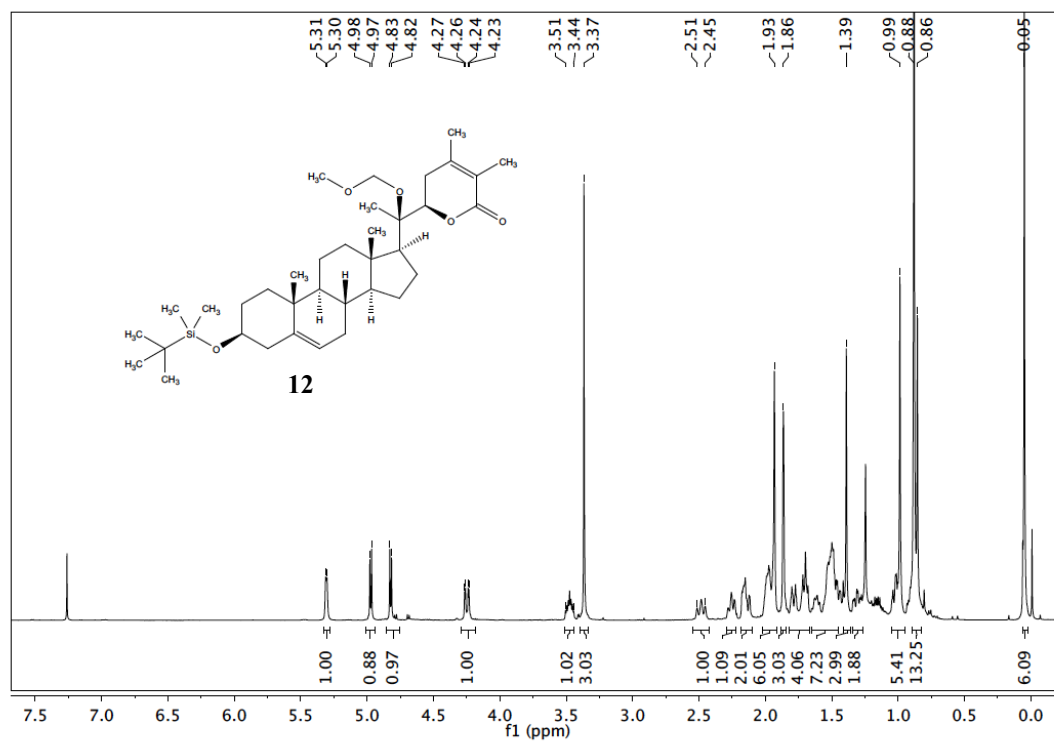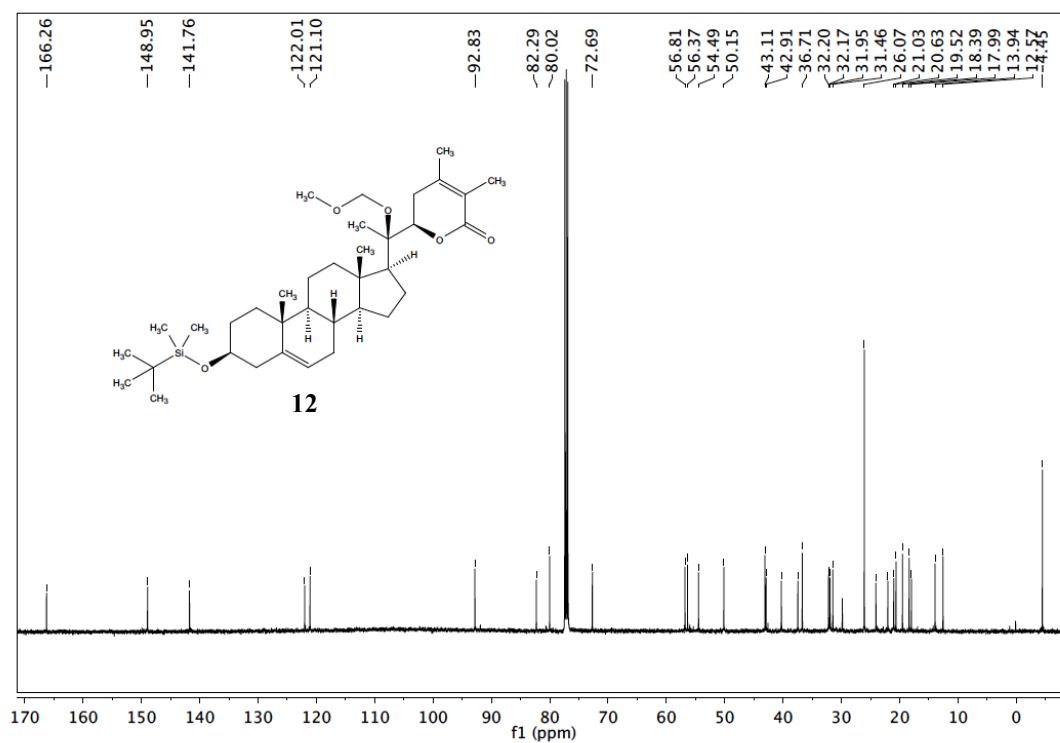

*Withanolide A: Synthesis and Structural Requirements for Neurite Outgrowth*

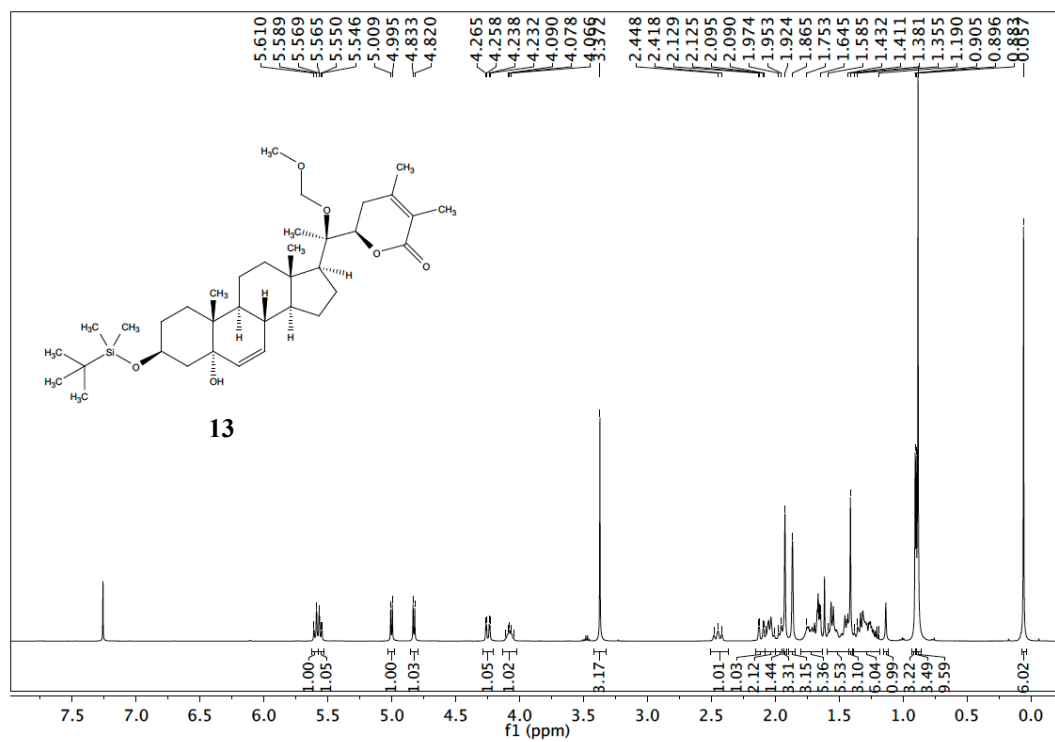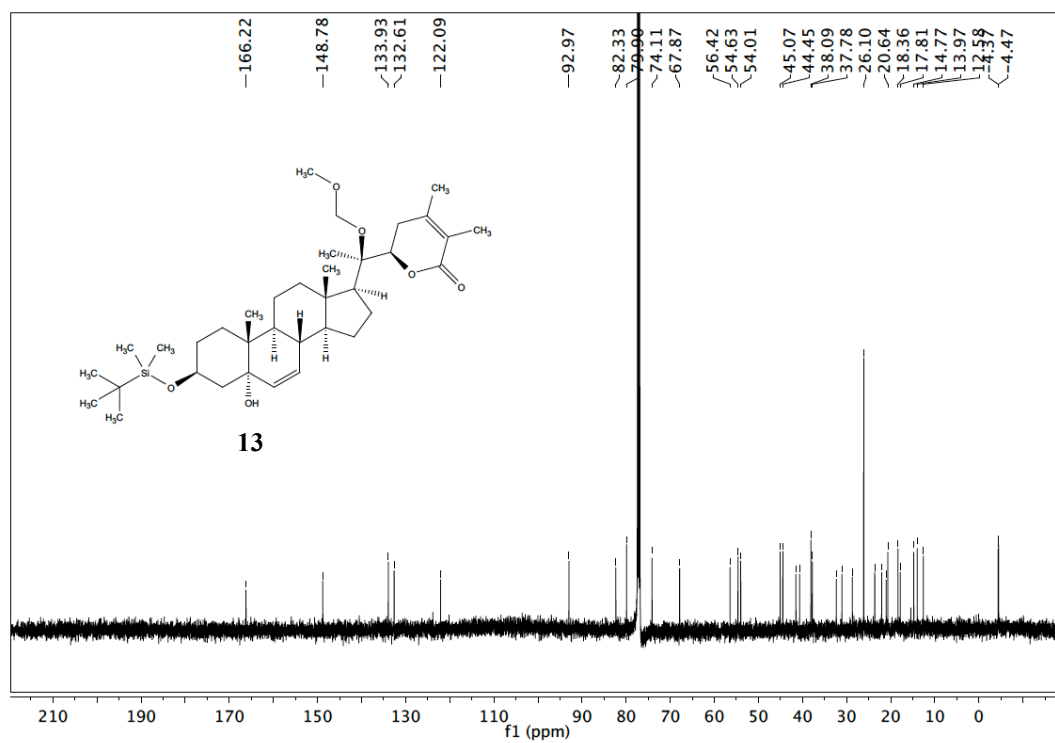

*Withanolide A: Synthesis and Structural Requirements for Neurite Outgrowth*

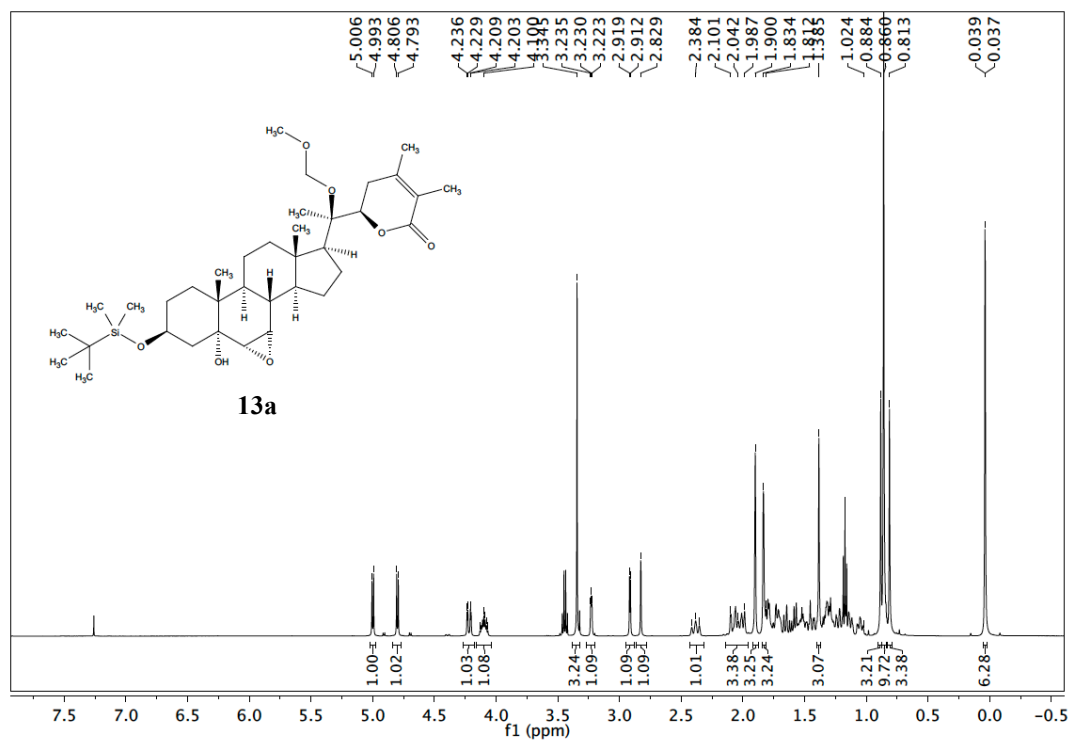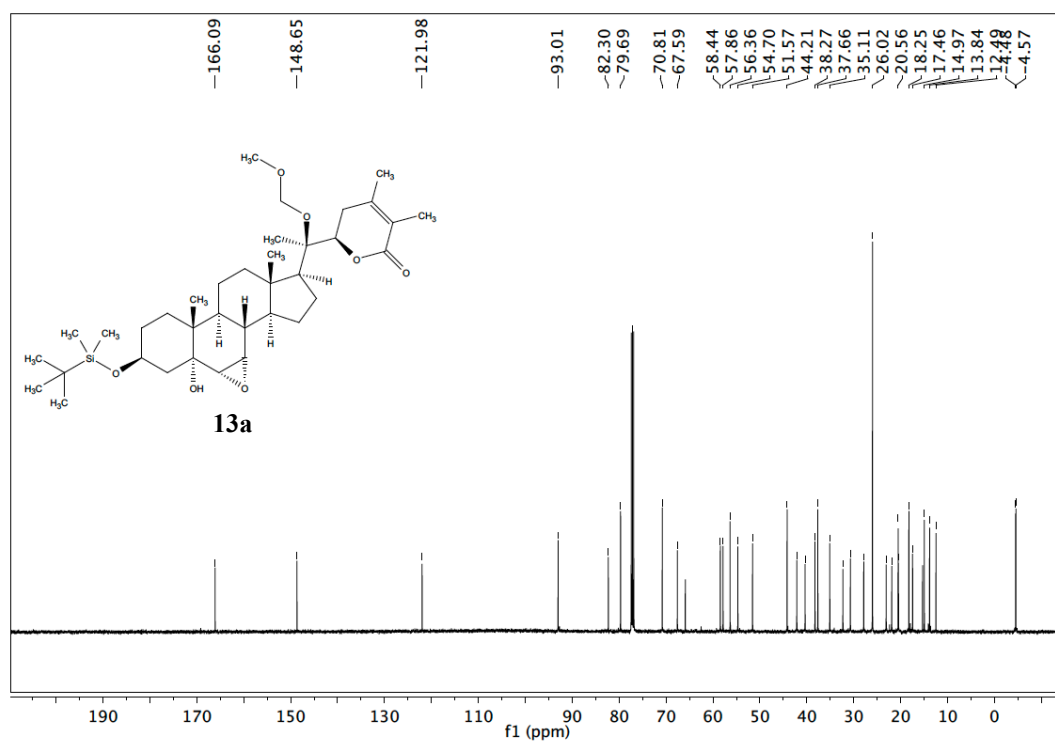

*Withanolide A: Synthesis and Structural Requirements for Neurite Outgrowth*

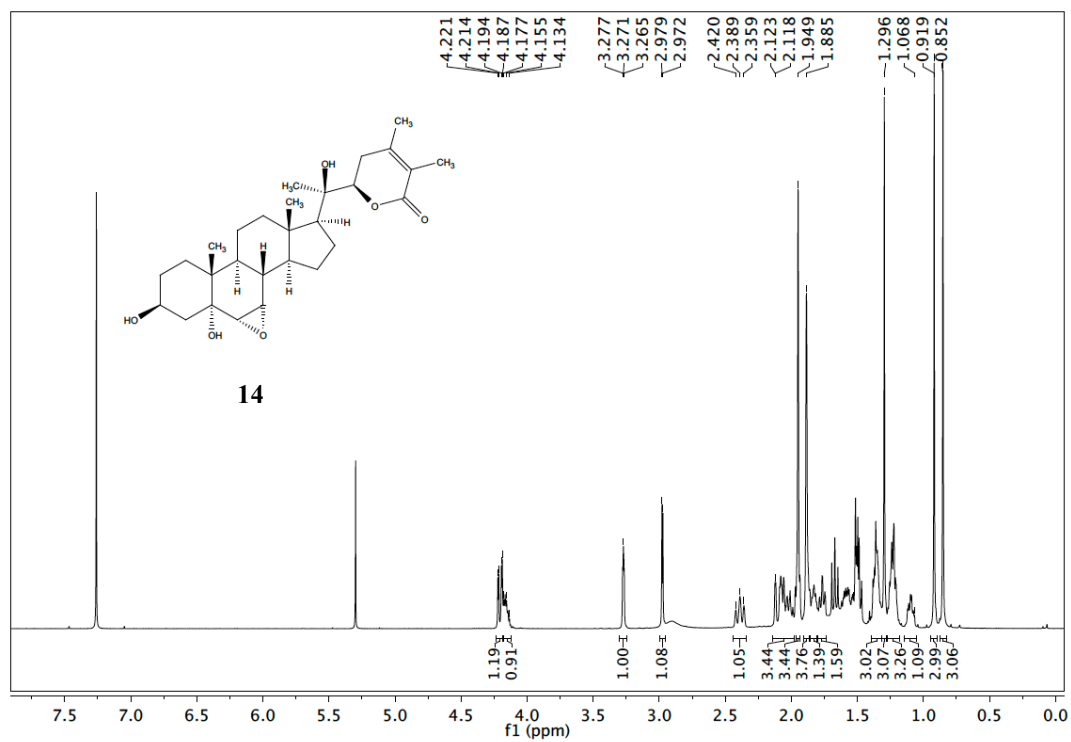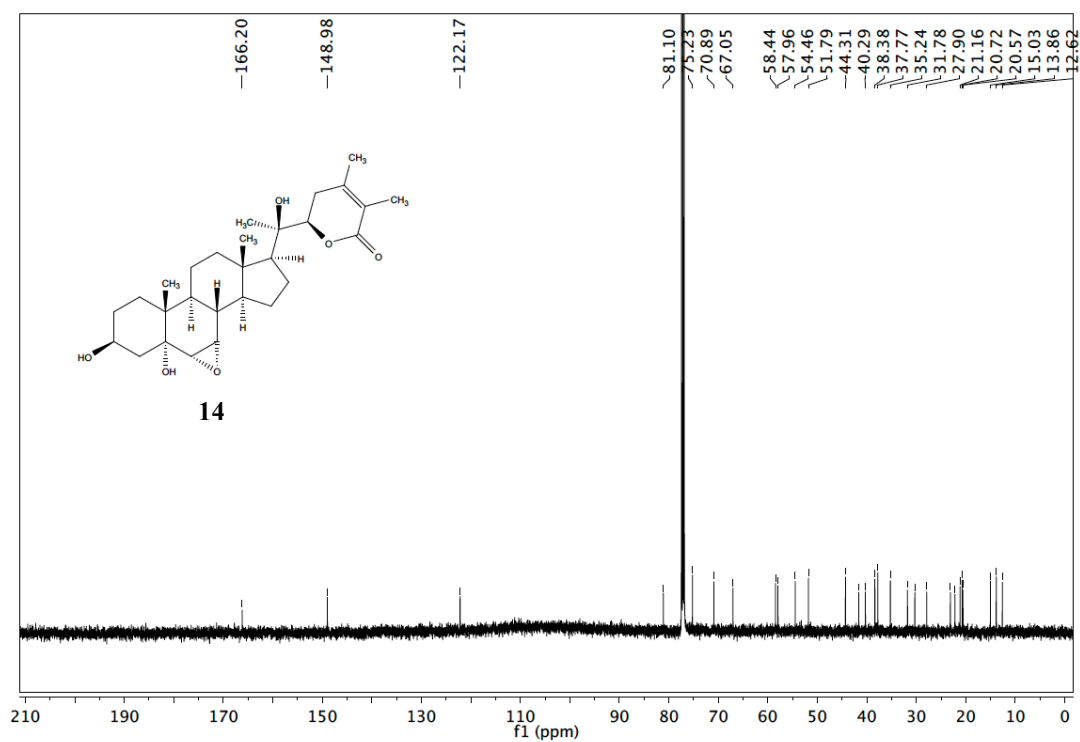

*Withanolide A: Synthesis and Structural Requirements for Neurite Outgrowth*

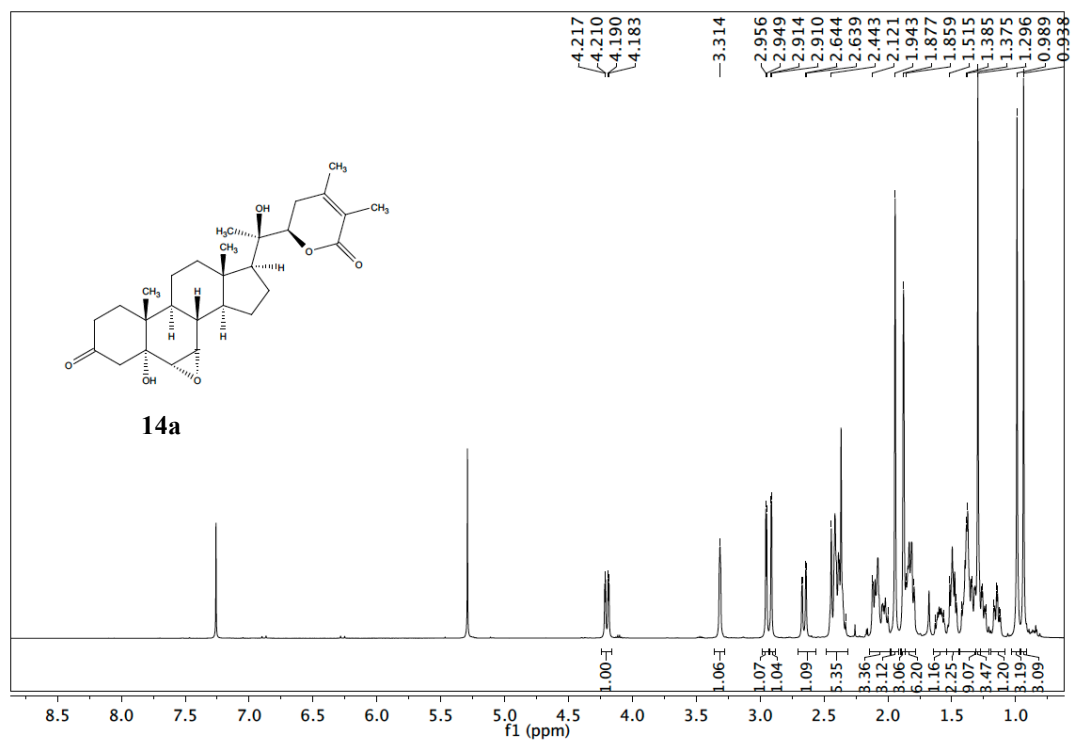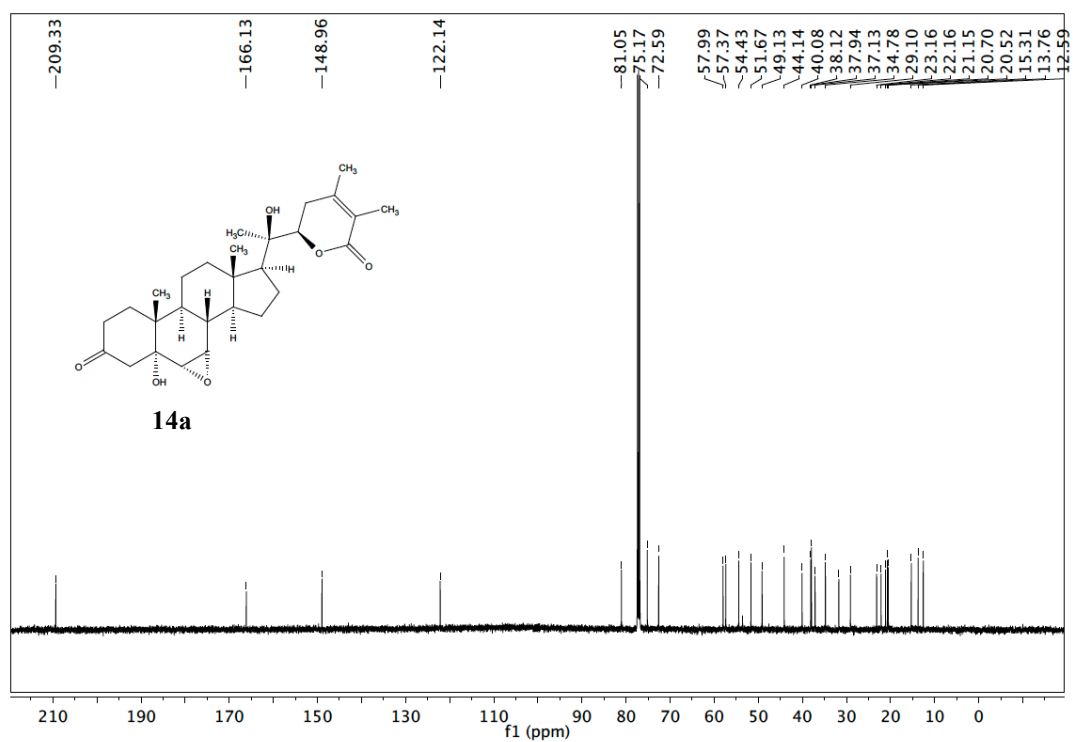



*Withanolide A: Synthesis and Structural Requirements for Neurite Outgrowth*

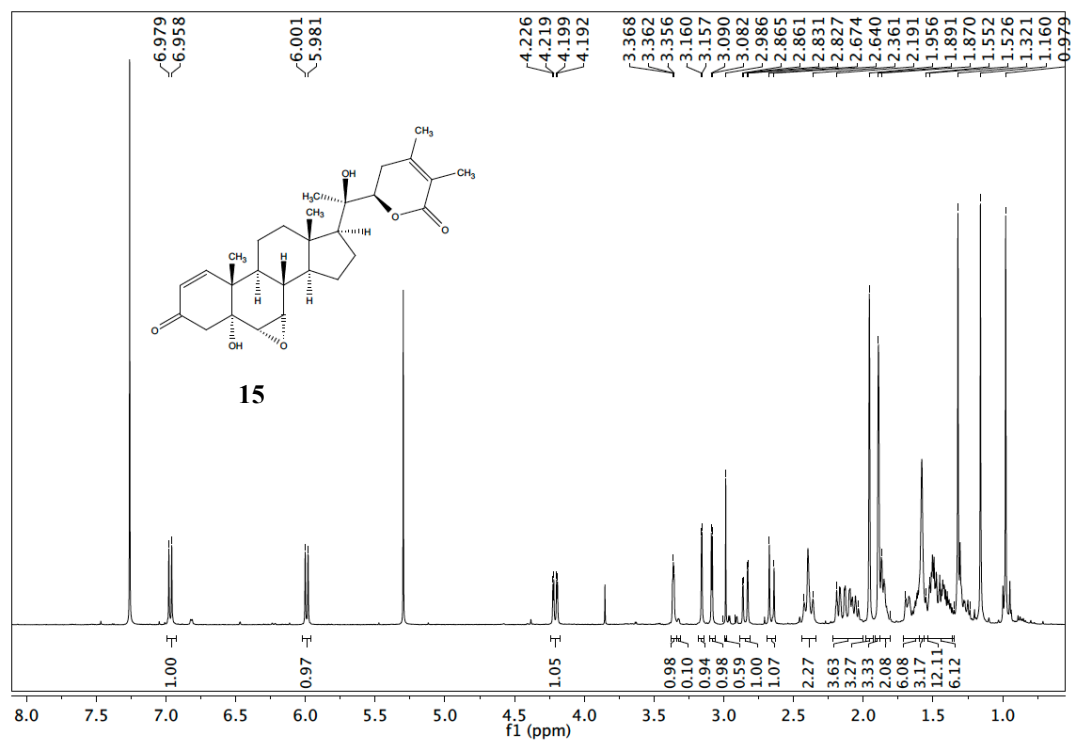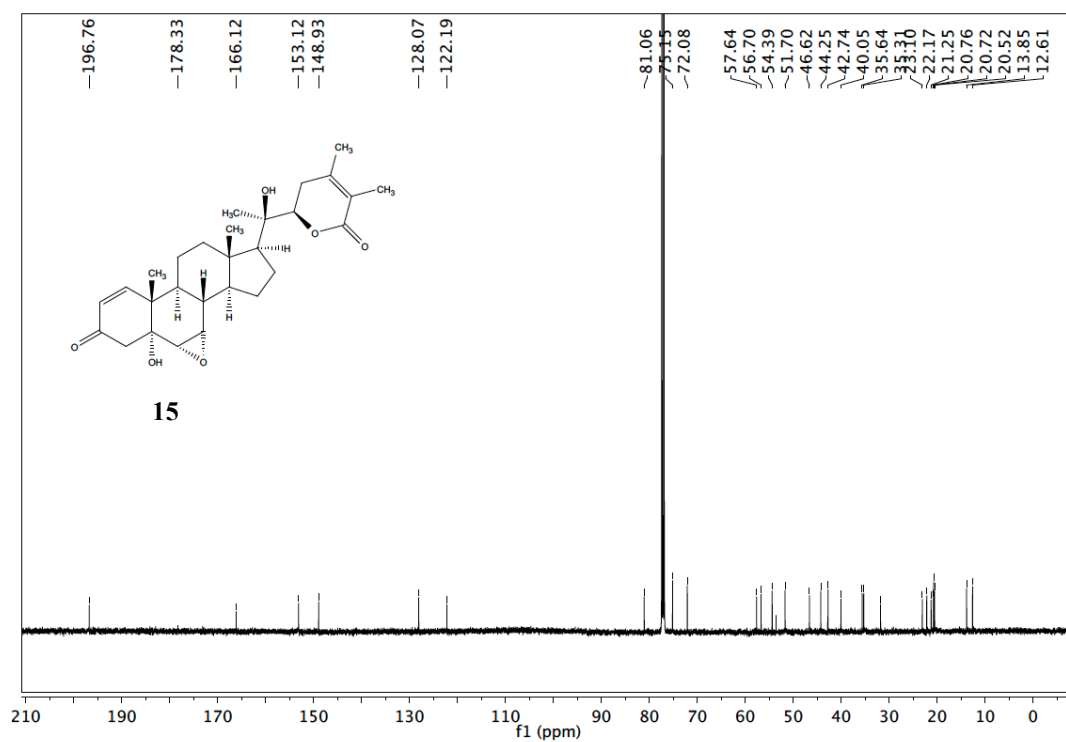

*Withanolide A: Synthesis and Structural Requirements for Neurite Outgrowth*

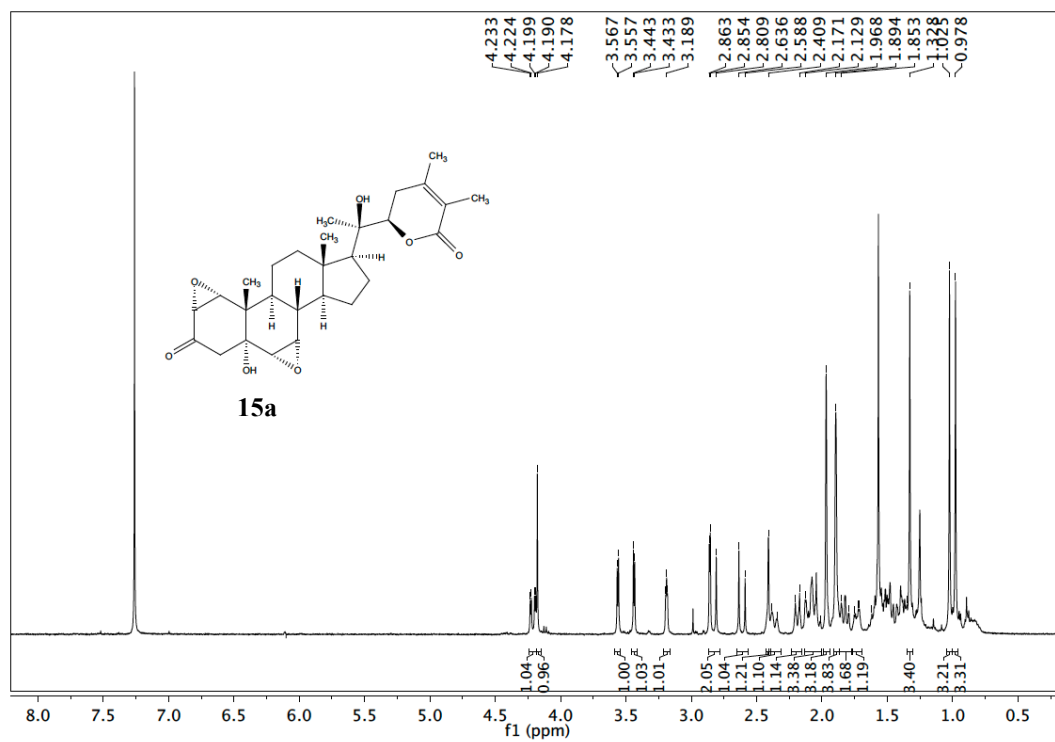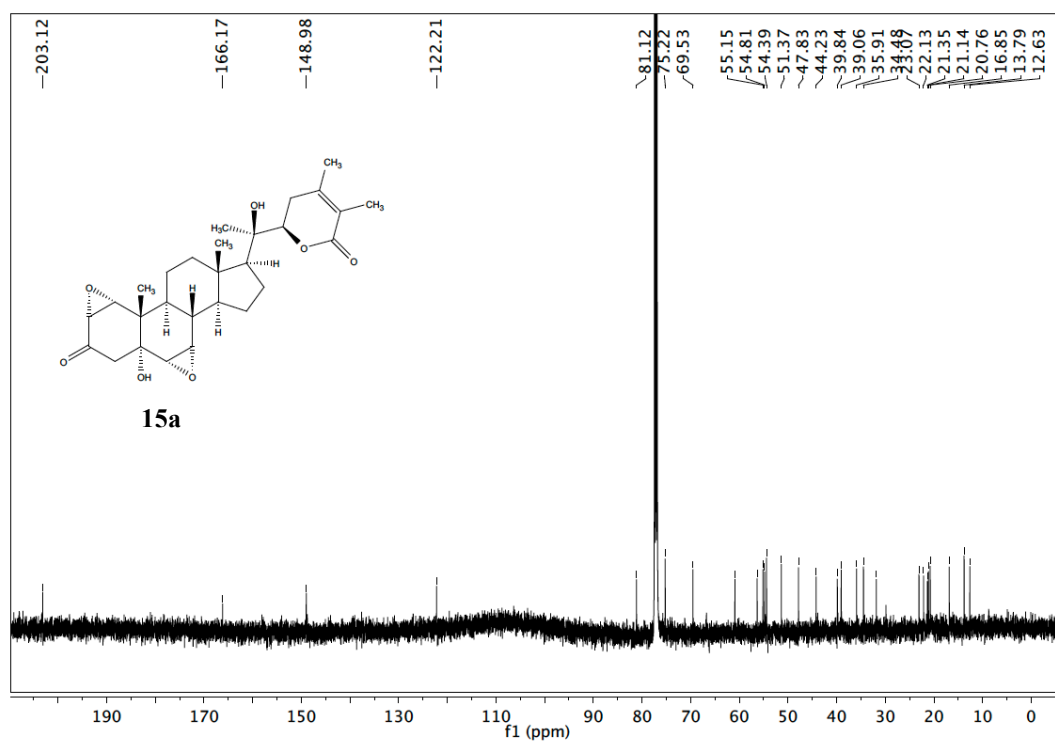

*Withanolide A: Synthesis and Structural Requirements for Neurite Outgrowth*

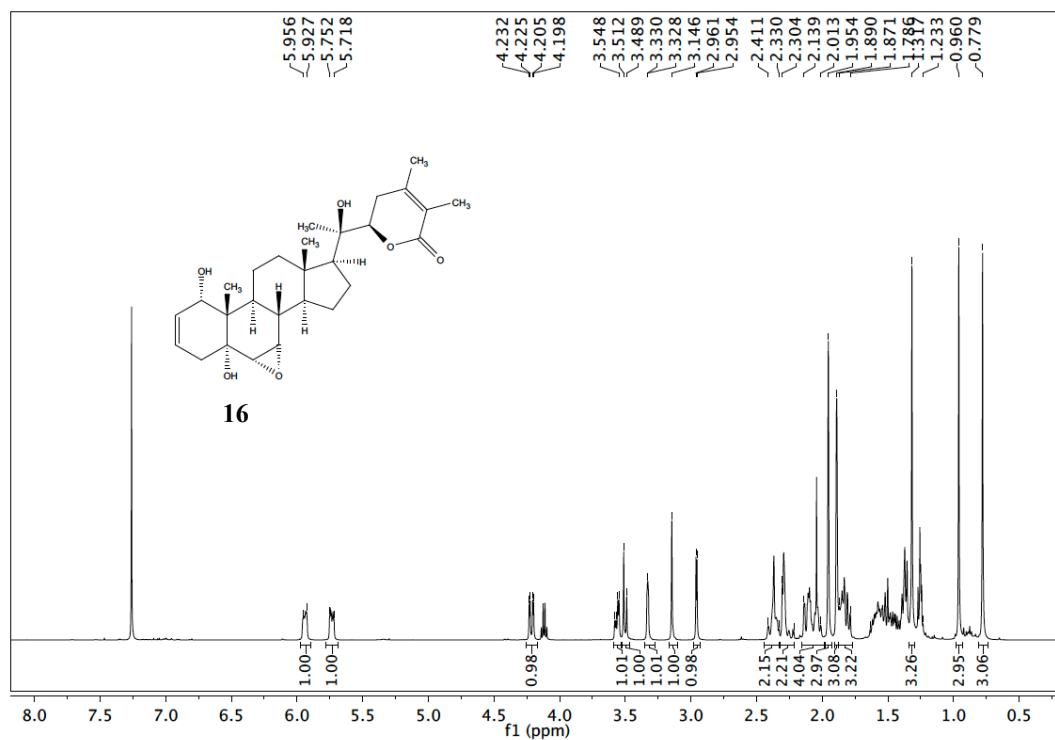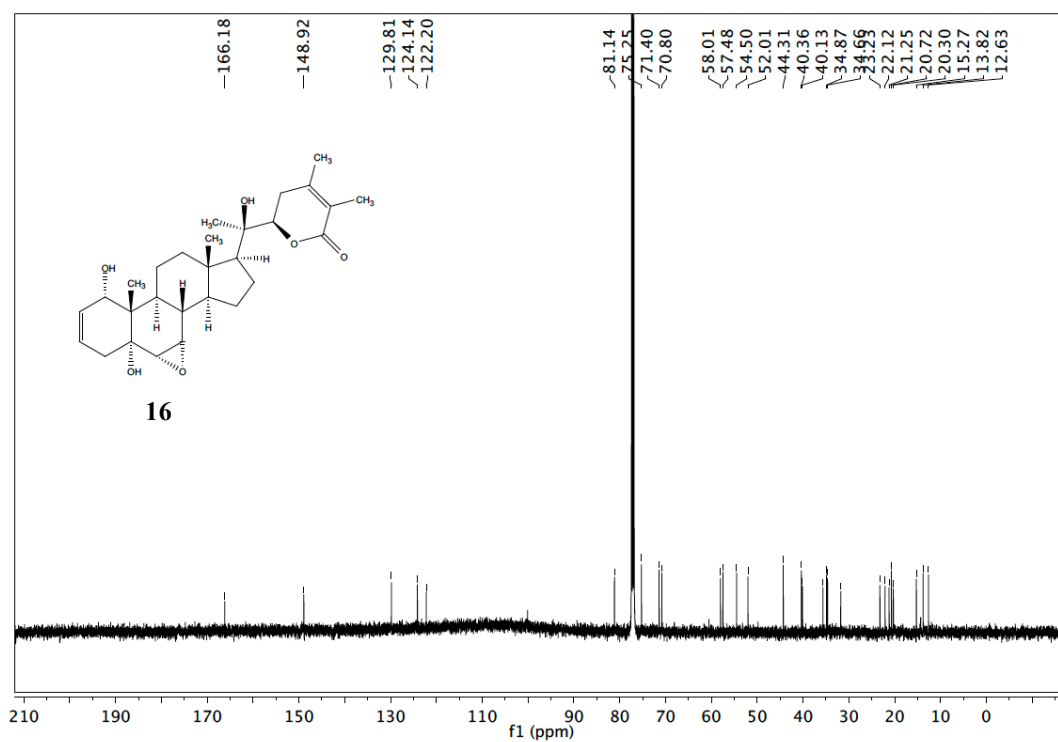

*Withanolide A: Synthesis and Structural Requirements for Neurite Outgrowth*

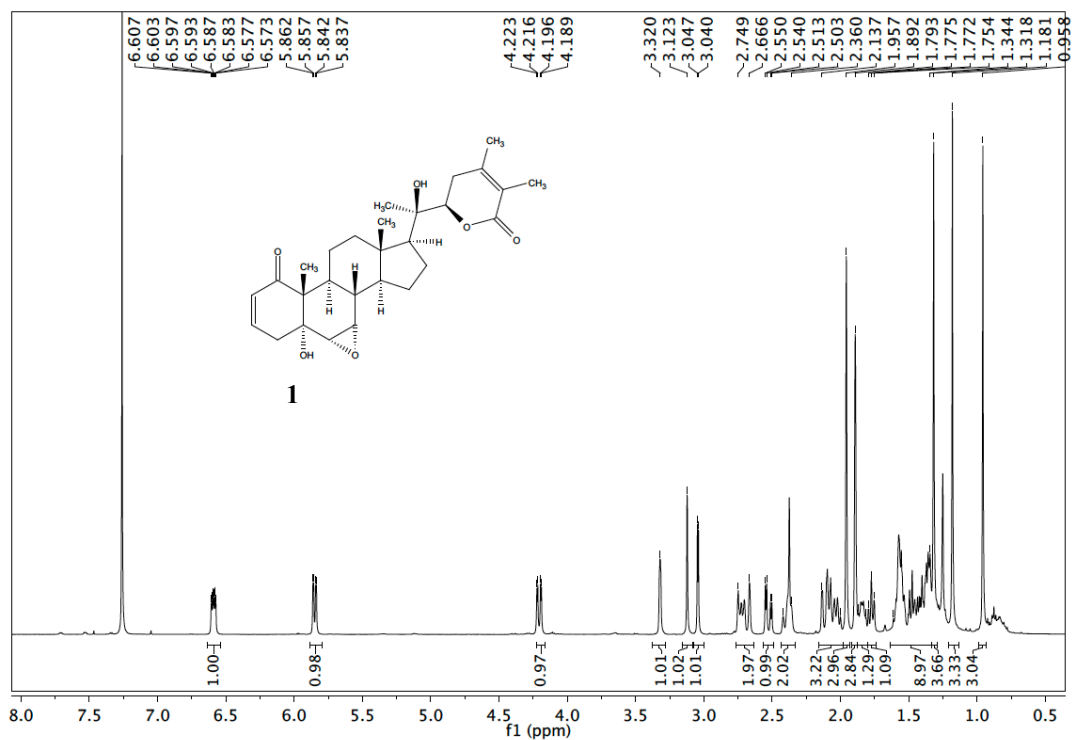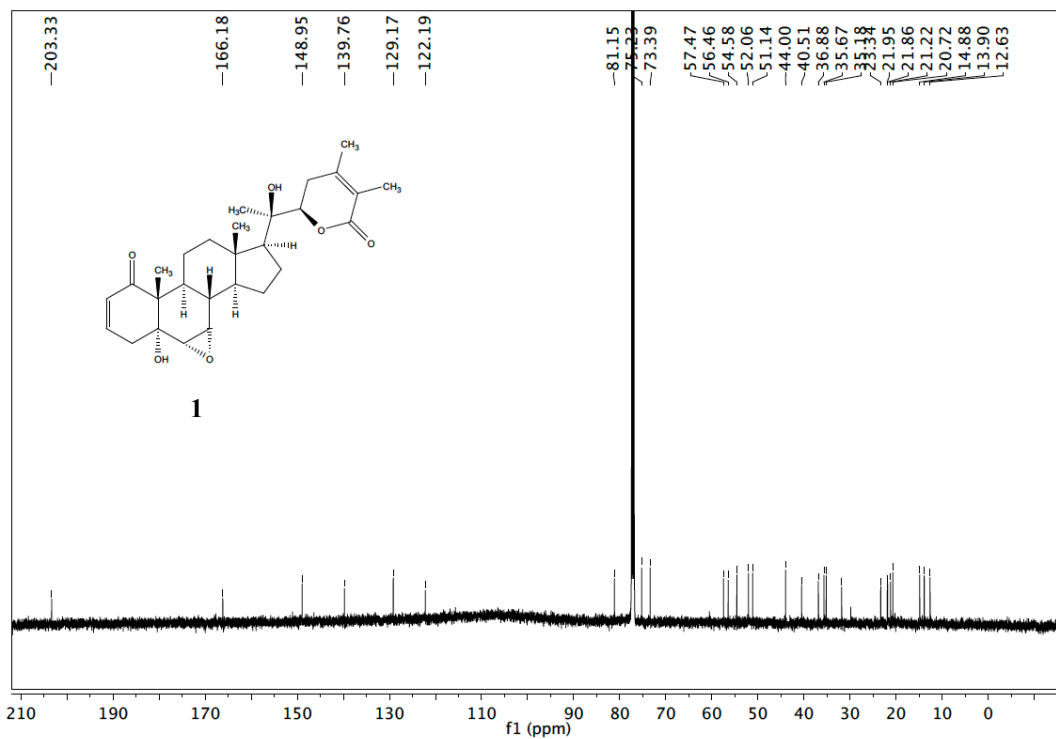

*Withanolide A: Synthesis and Structural Requirements for Neurite Outgrowth*

**Semi-Synthesis (Scheme 3, Scheme 4, Scheme 5, Scheme 6)**

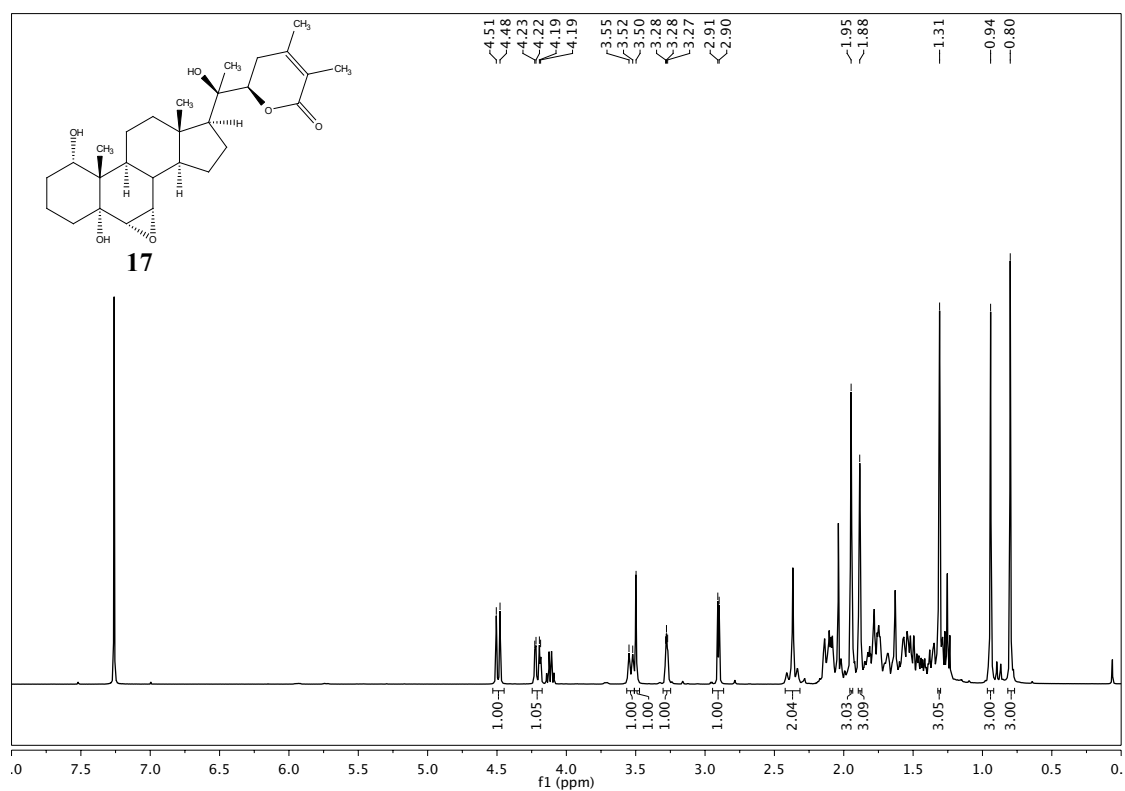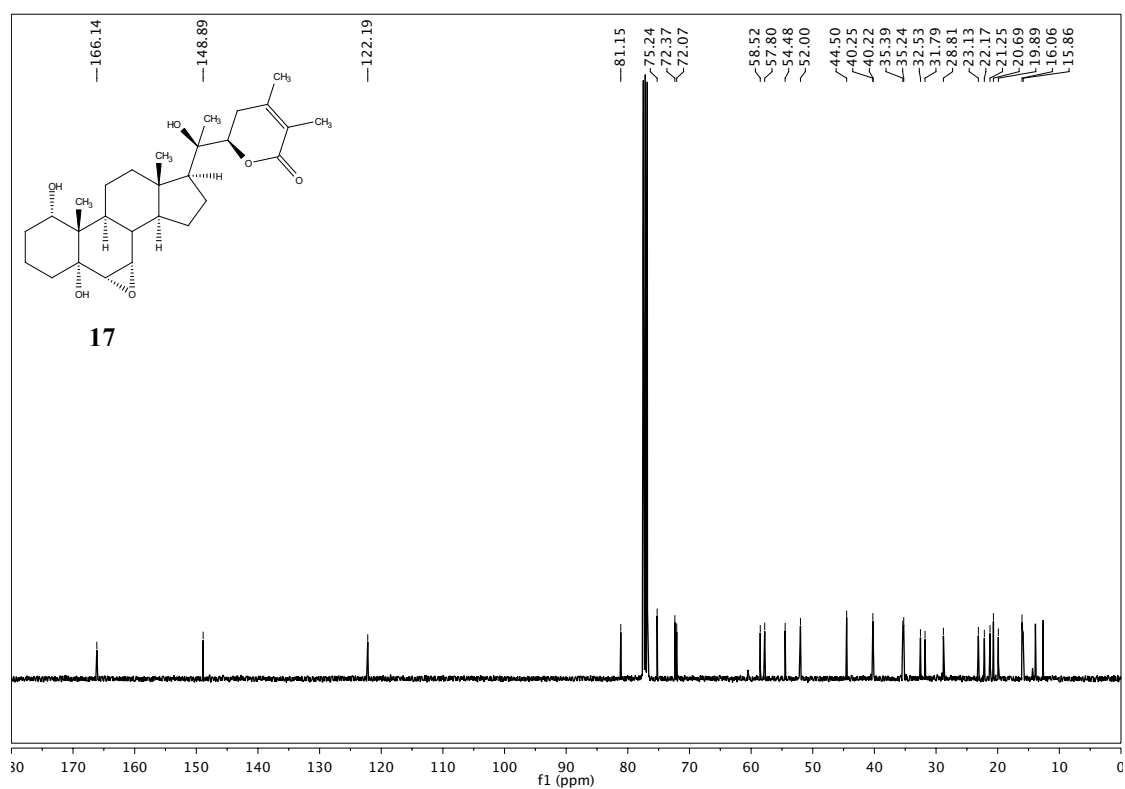

*Withanolide A: Synthesis and Structural Requirements for Neurite Outgrowth*

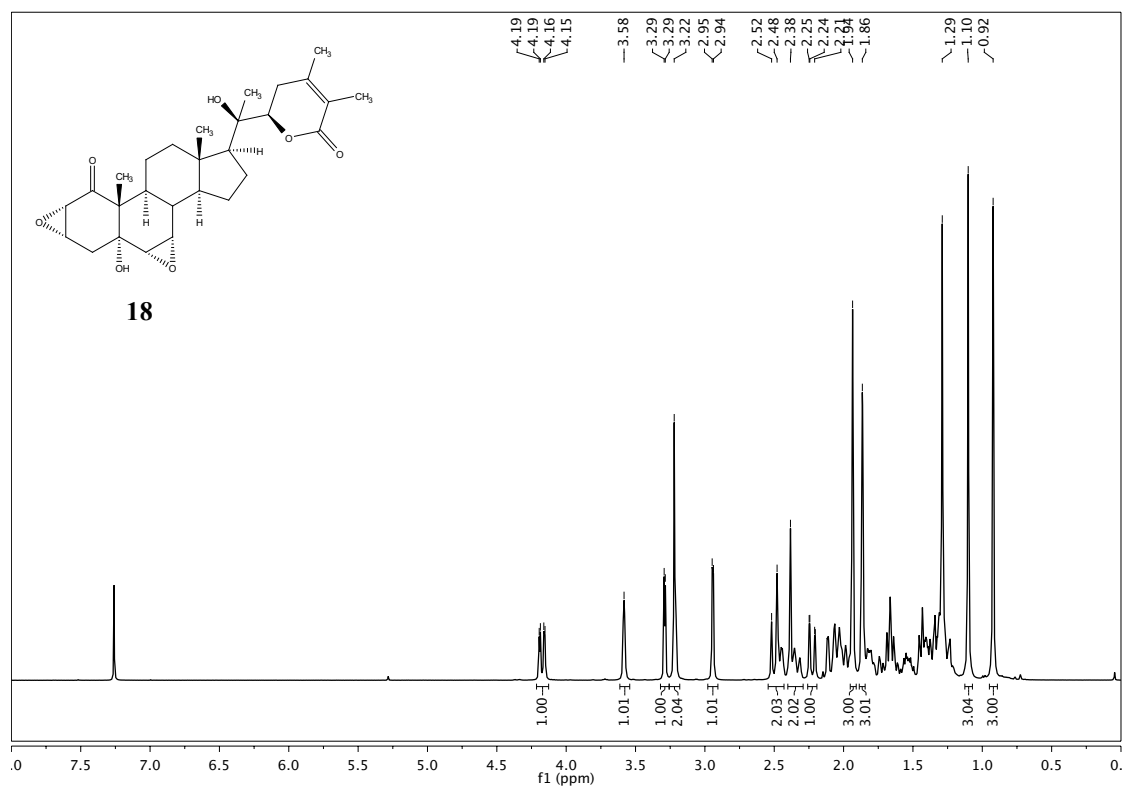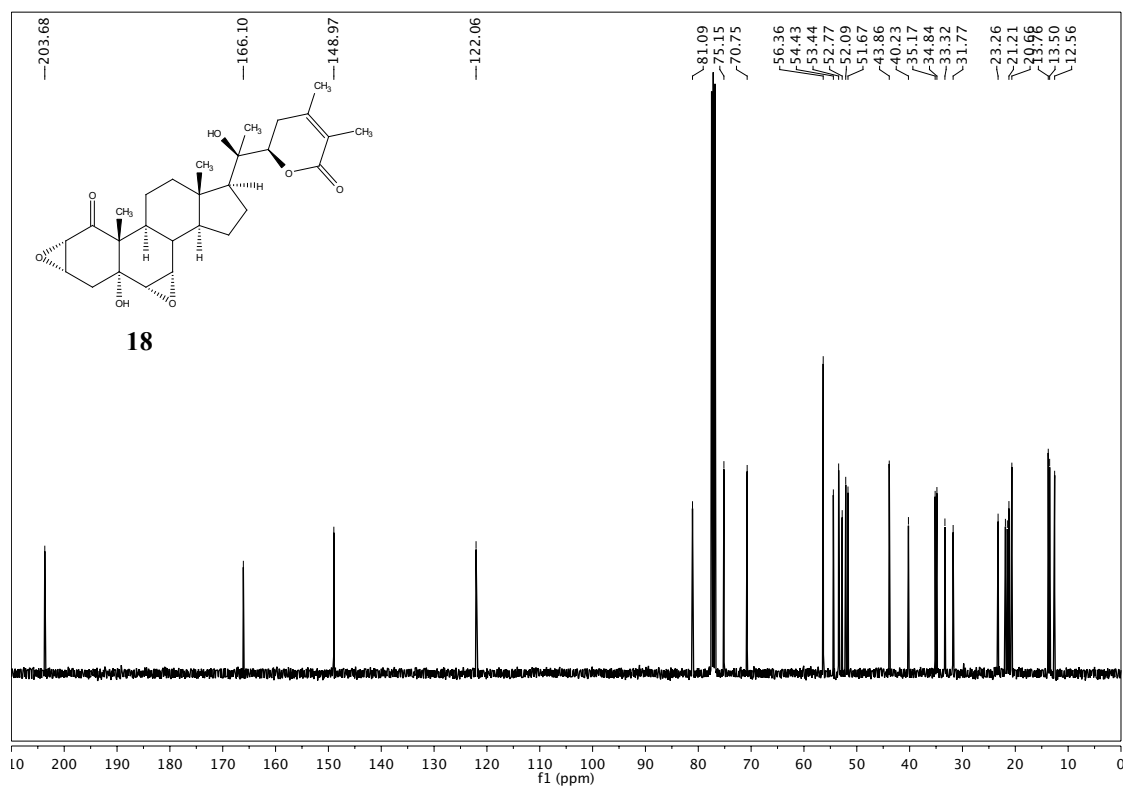

*Withanolide A: Synthesis and Structural Requirements for Neurite Outgrowth*

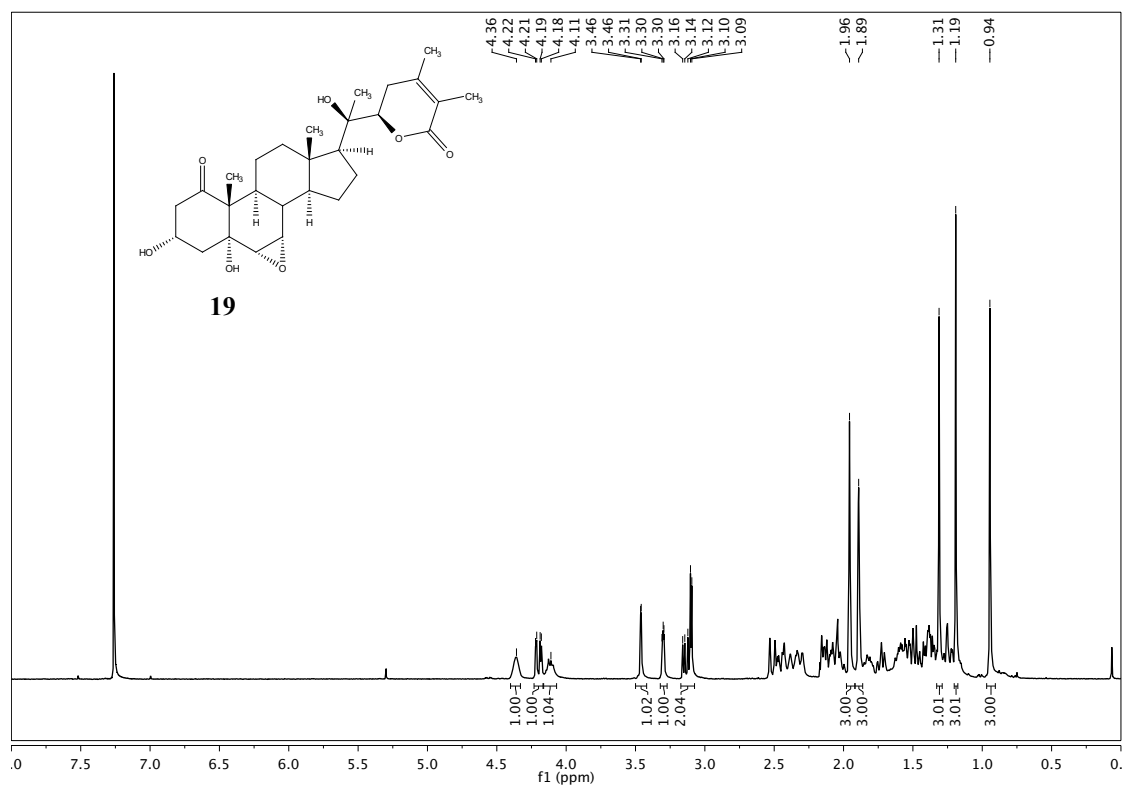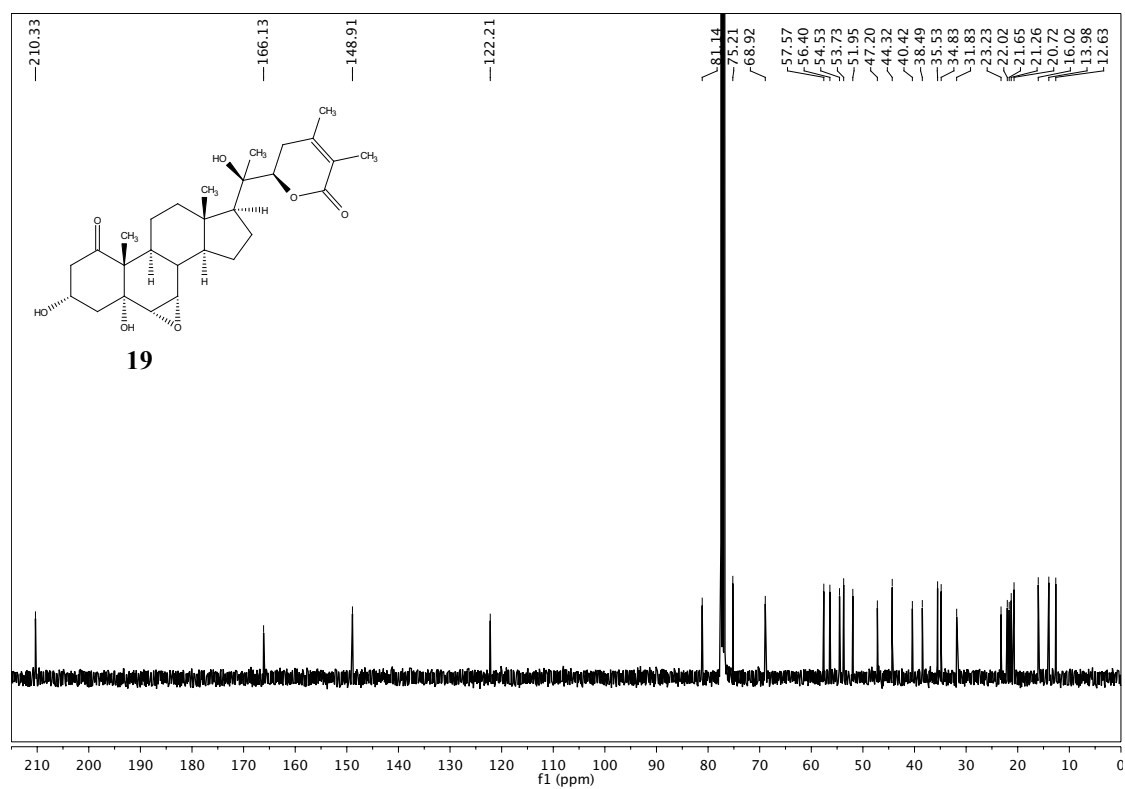

*Withanolide A: Synthesis and Structural Requirements for Neurite Outgrowth*

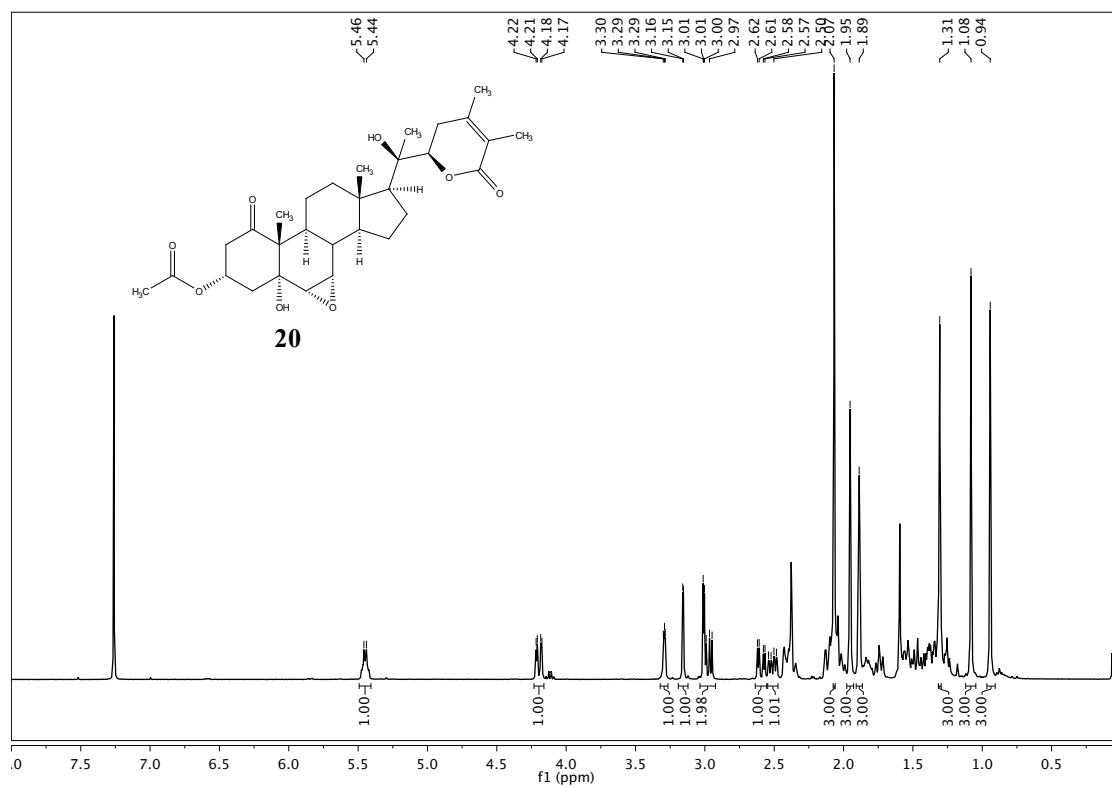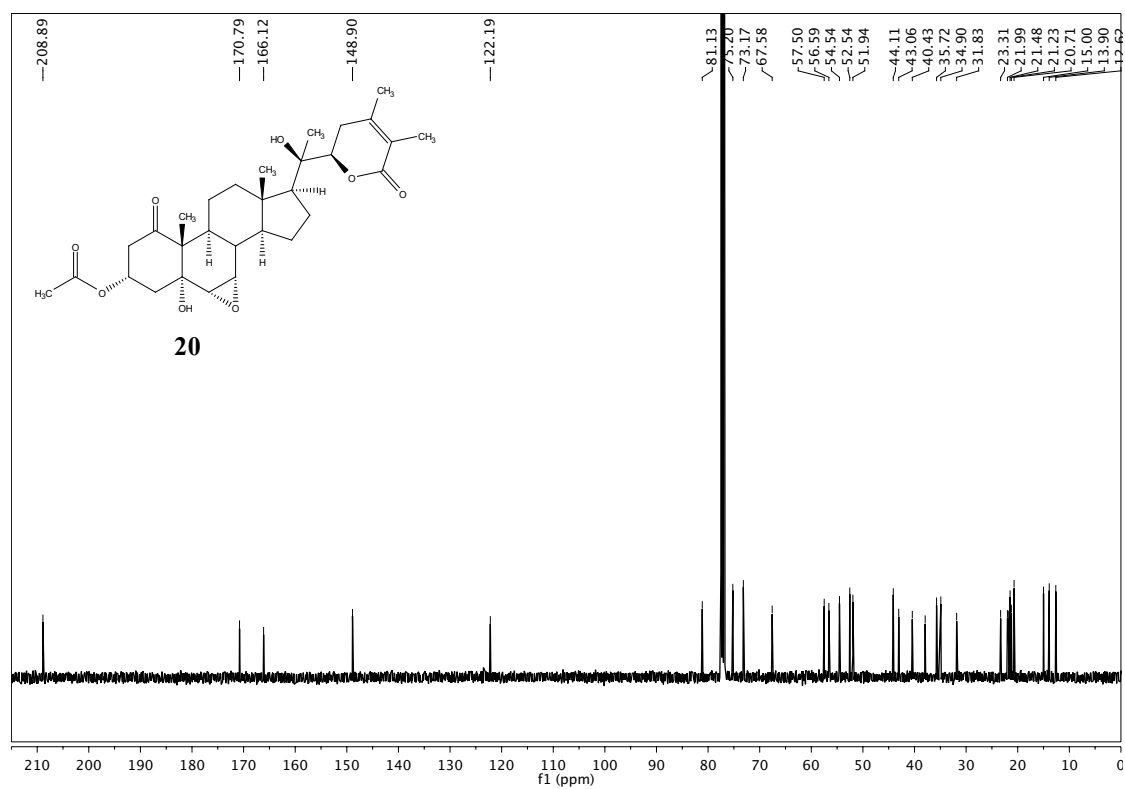



*Withanolide A: Synthesis and Structural Requirements for Neurite Outgrowth*

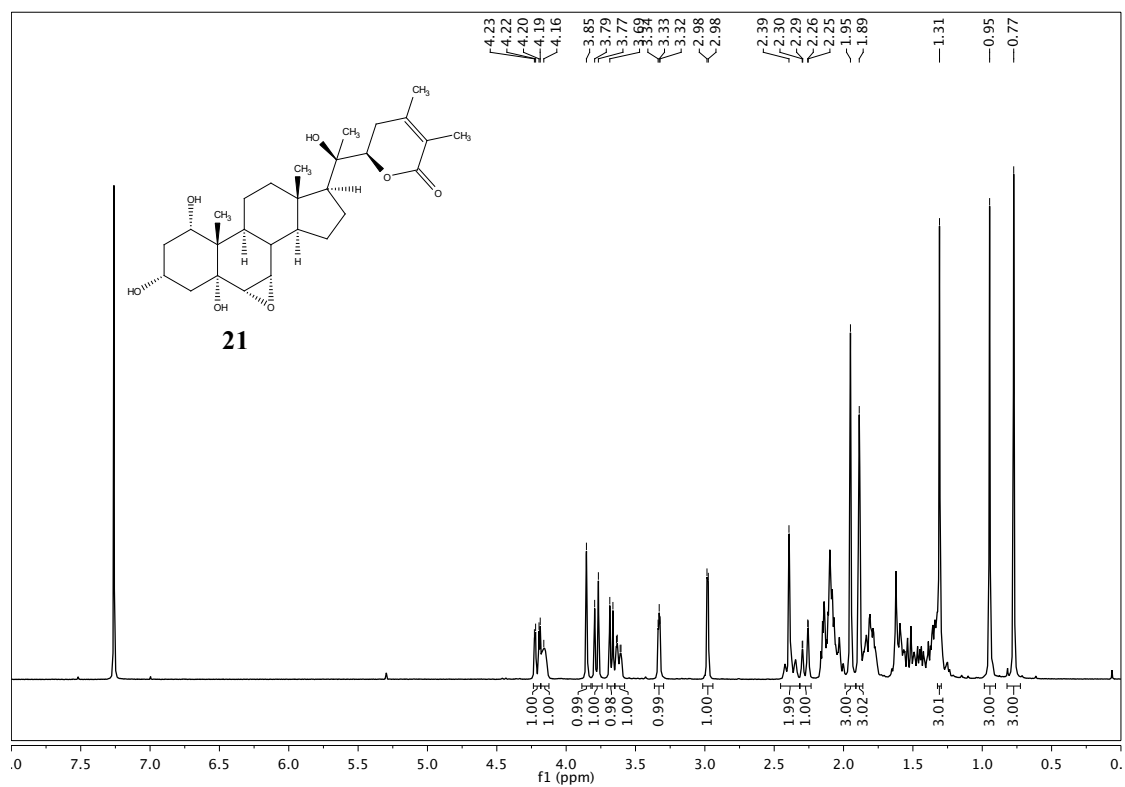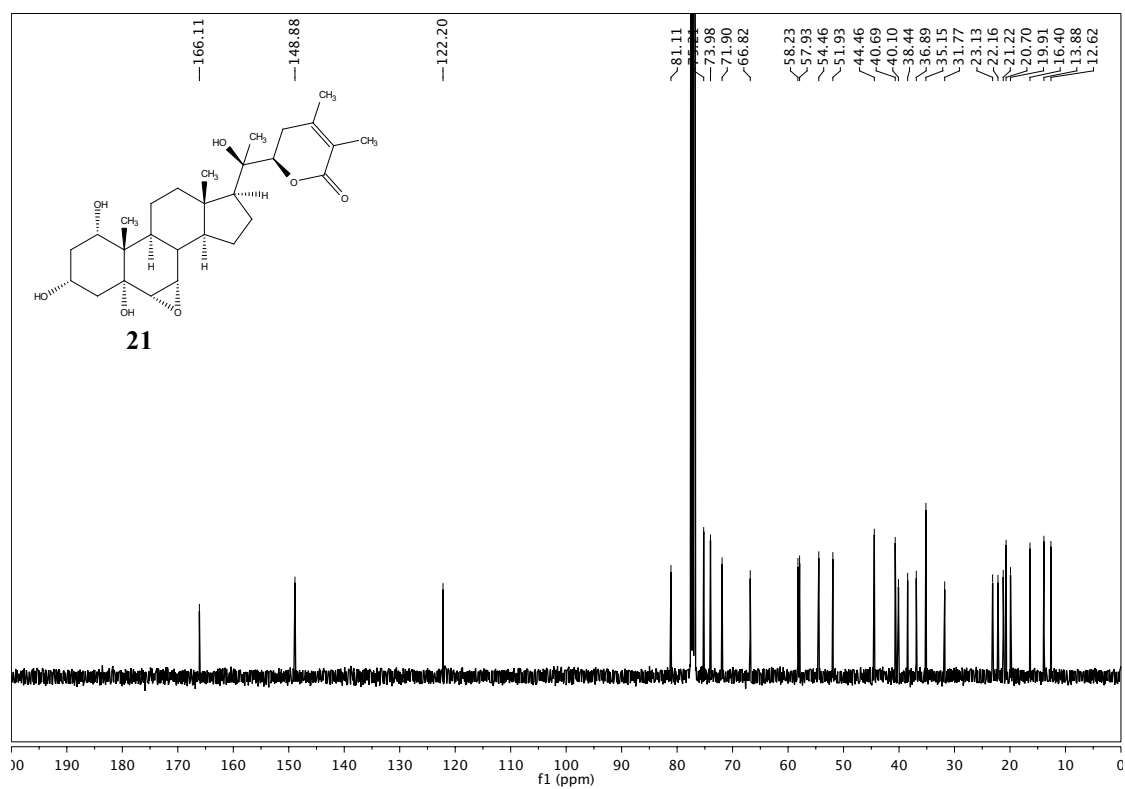

*Withanolide A: Synthesis and Structural Requirements for Neurite Outgrowth*

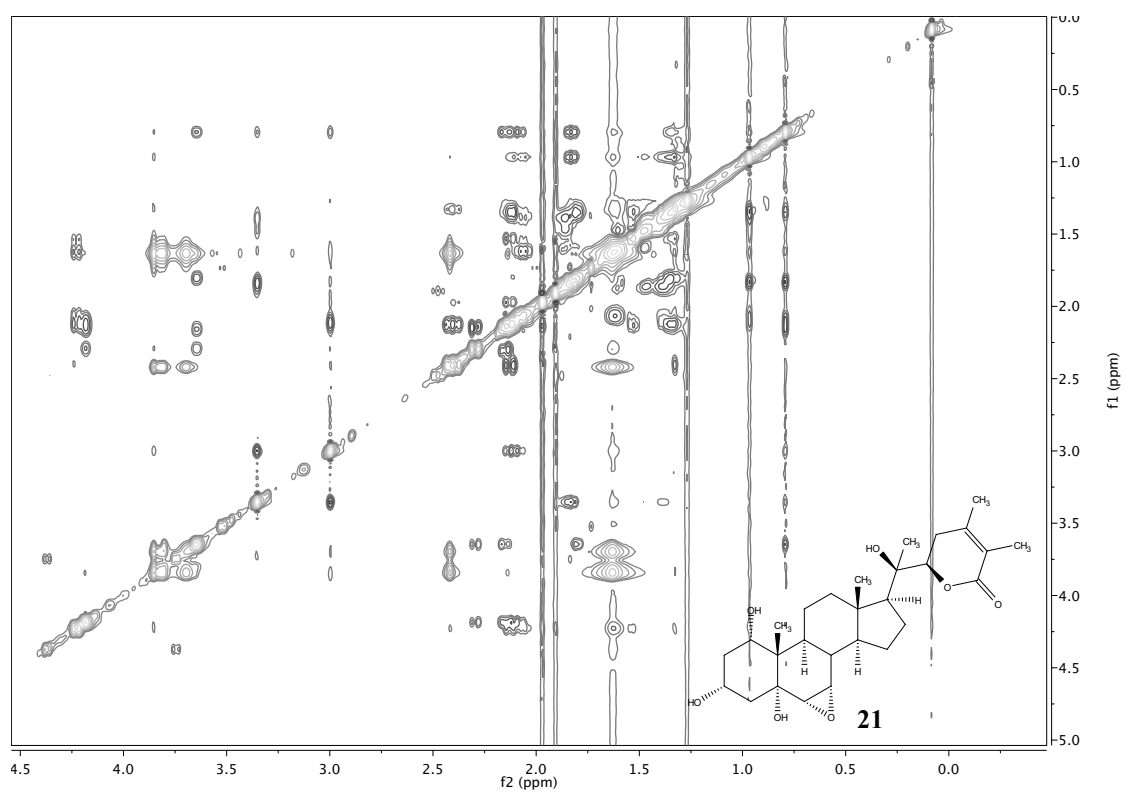

*Withanolide A: Synthesis and Structural Requirements for Neurite Outgrowth*

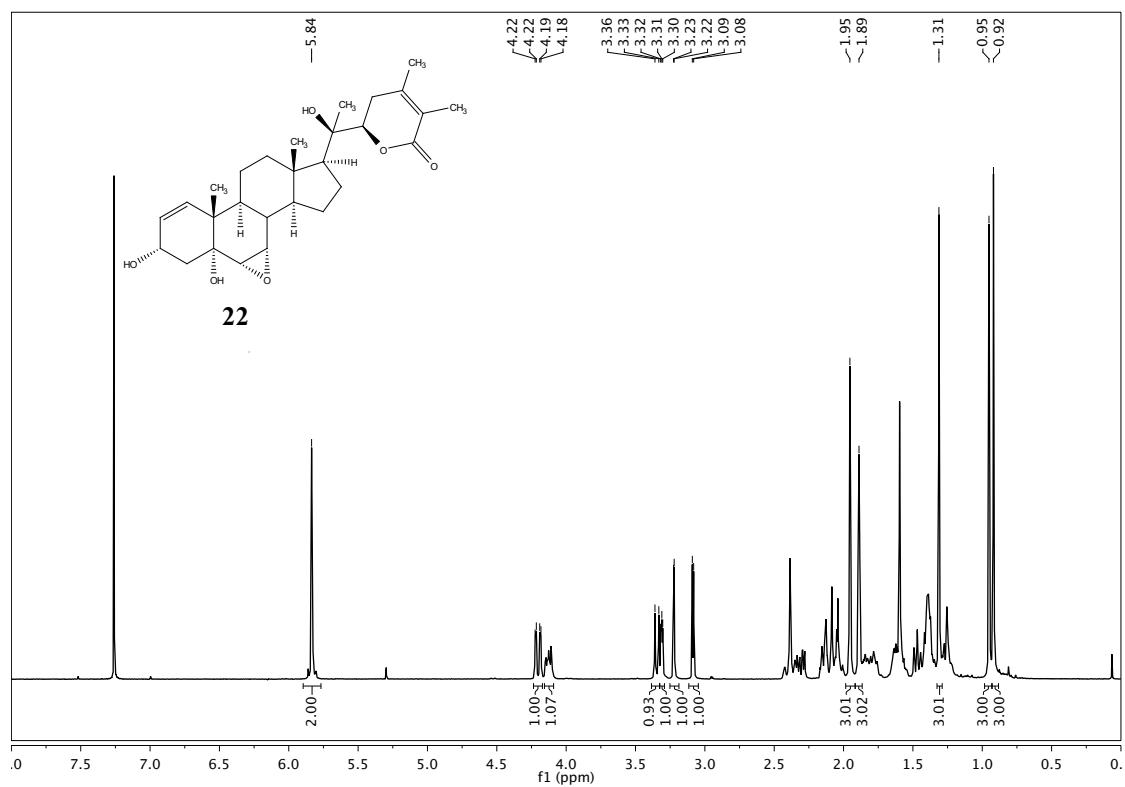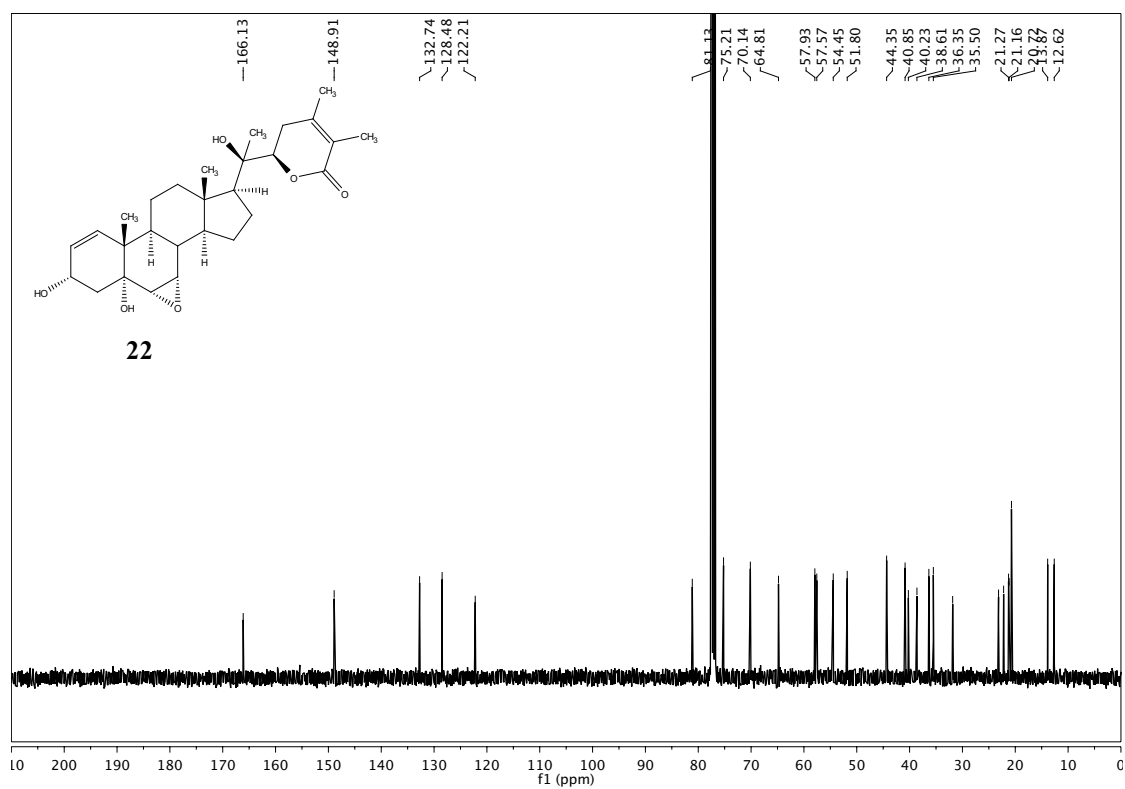

*Withanolide A: Synthesis and Structural Requirements for Neurite Outgrowth*

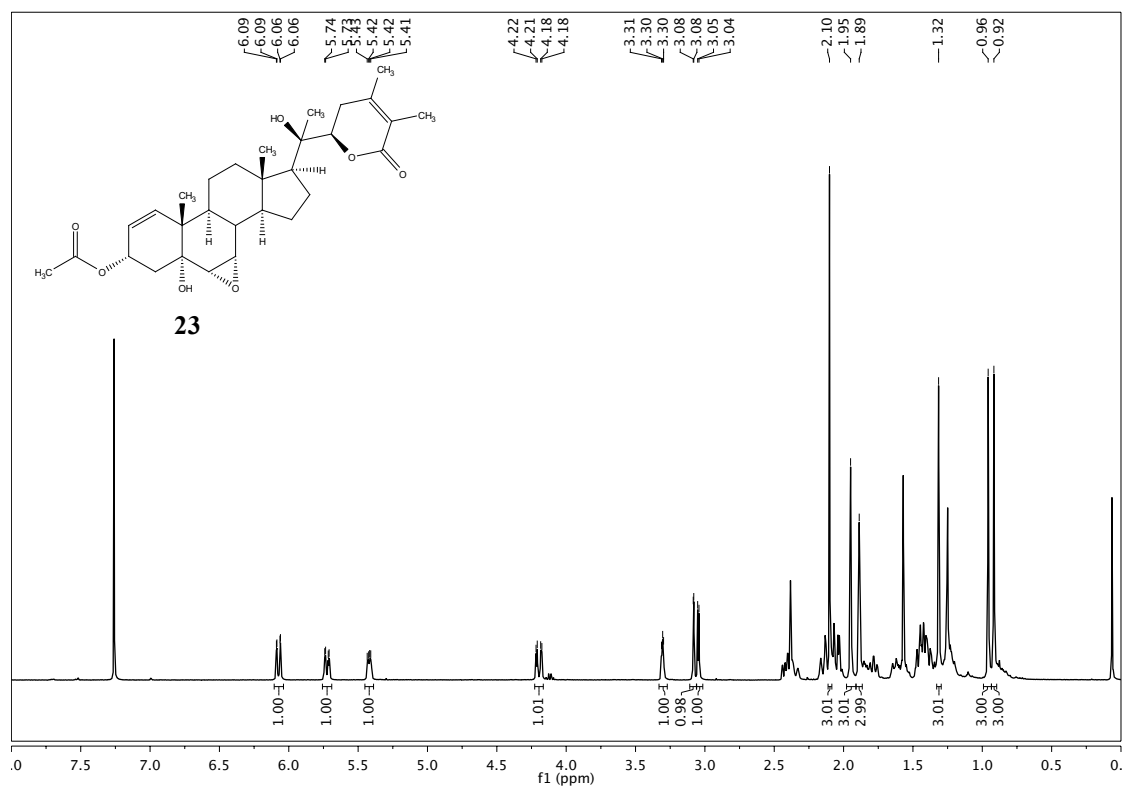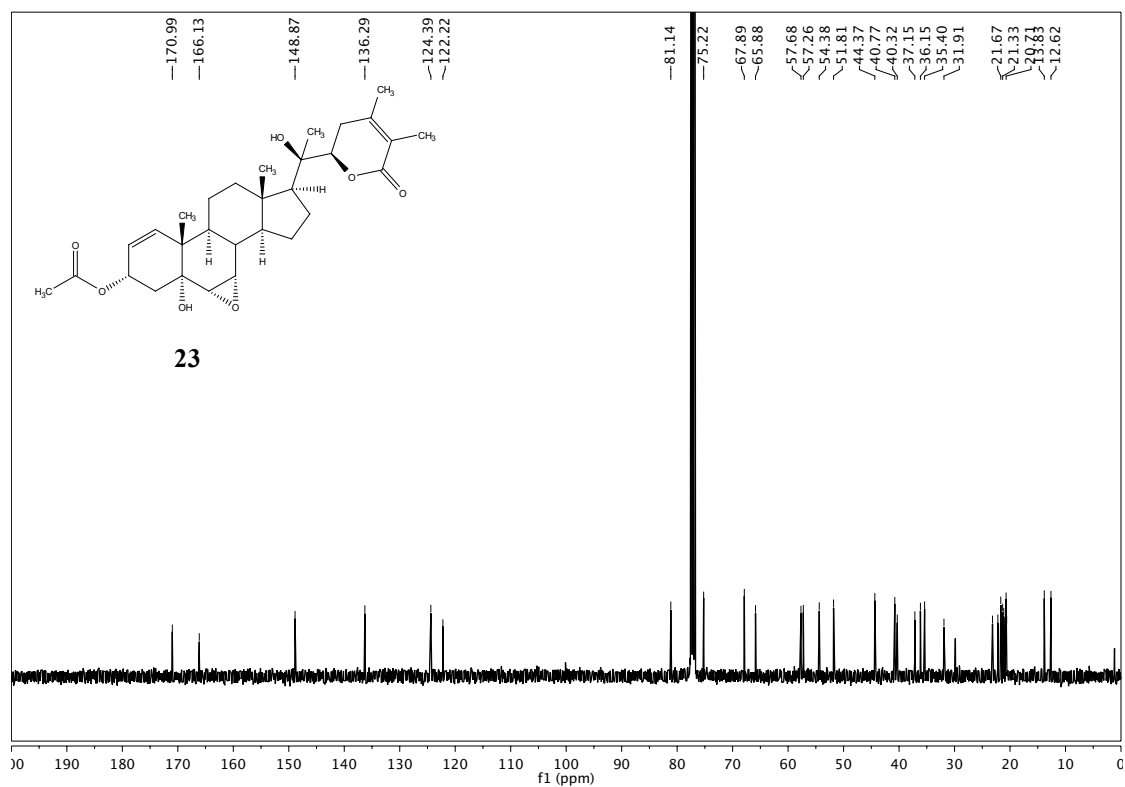

*Withanolide A: Synthesis and Structural Requirements for Neurite Outgrowth*

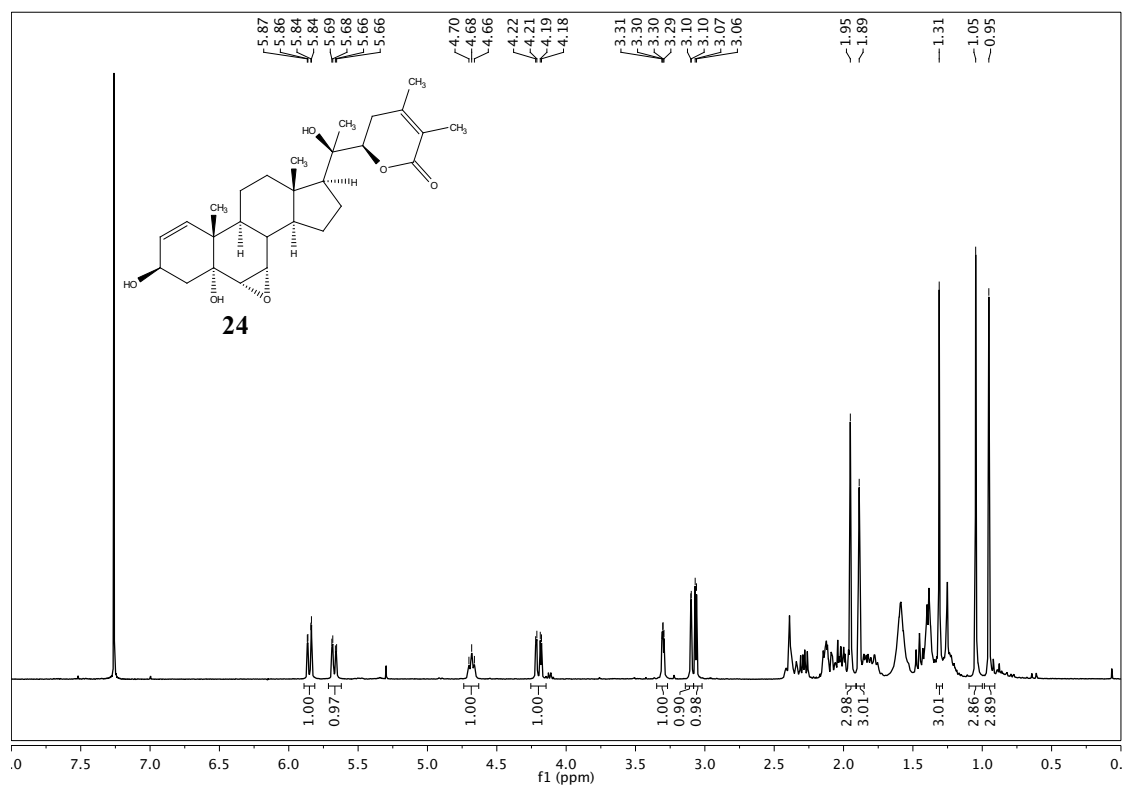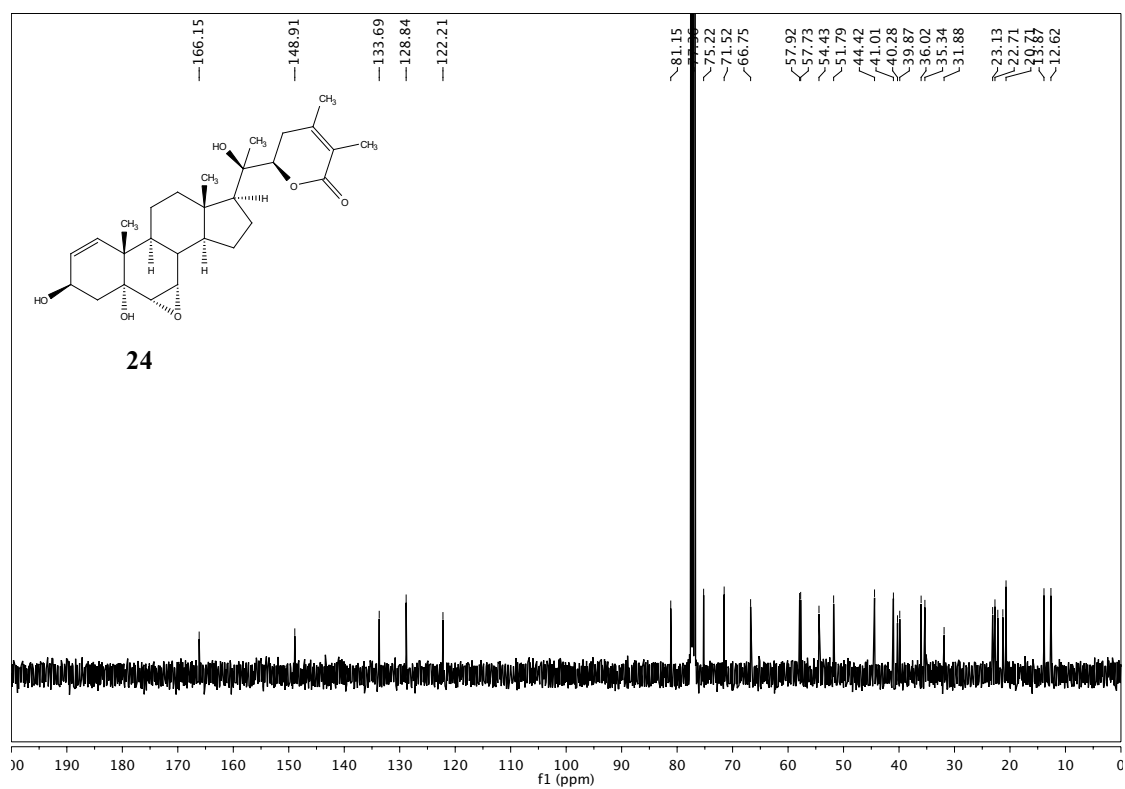

*Withanolide A: Synthesis and Structural Requirements for Neurite Outgrowth*

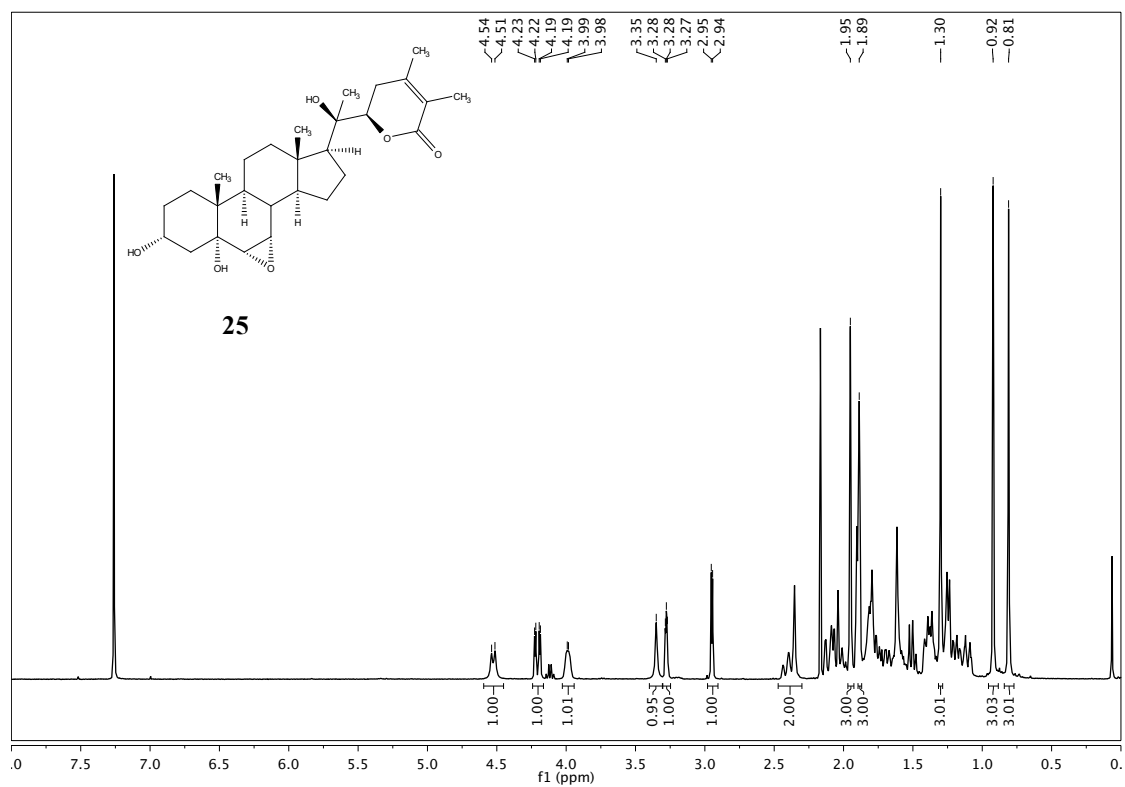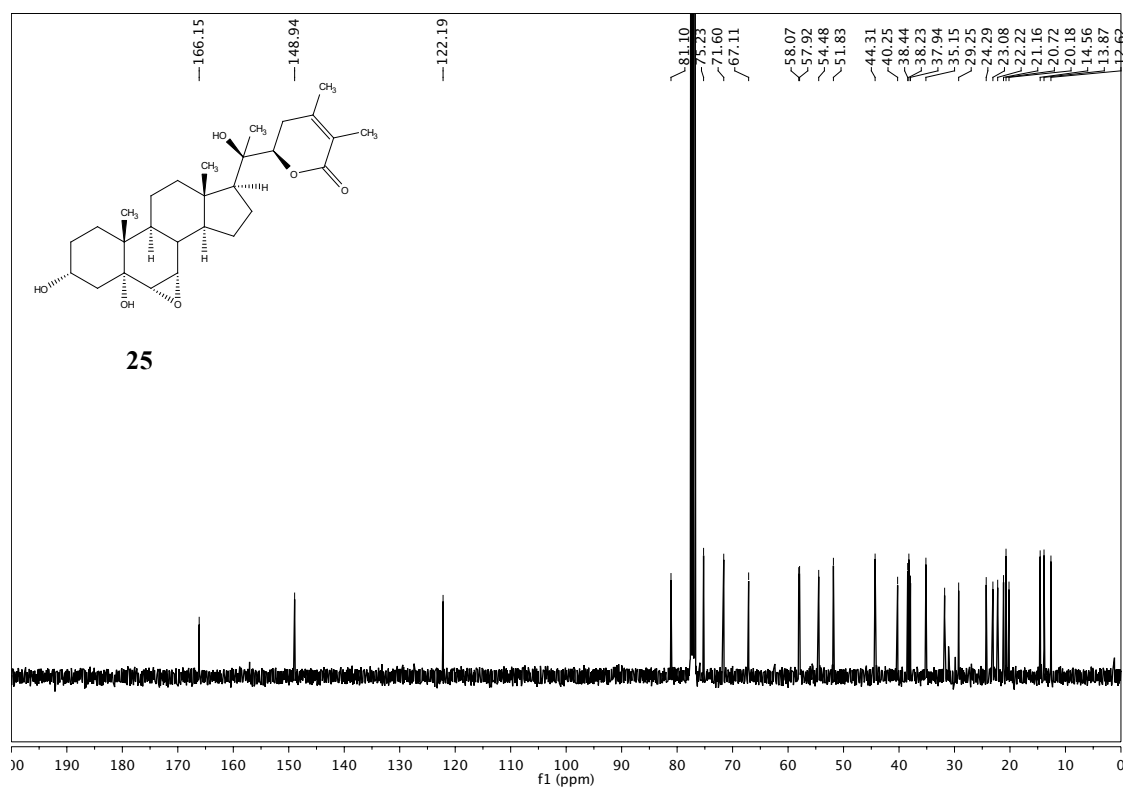

*Withanolide A: Synthesis and Structural Requirements for Neurite Outgrowth*

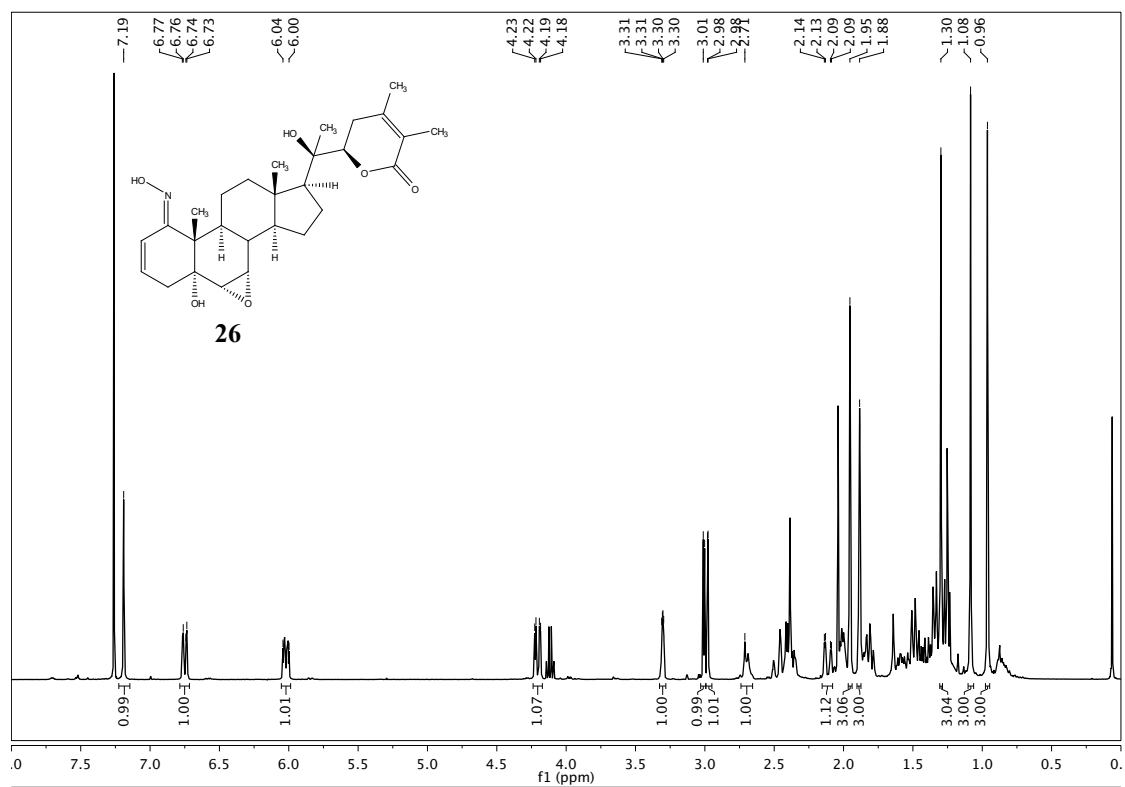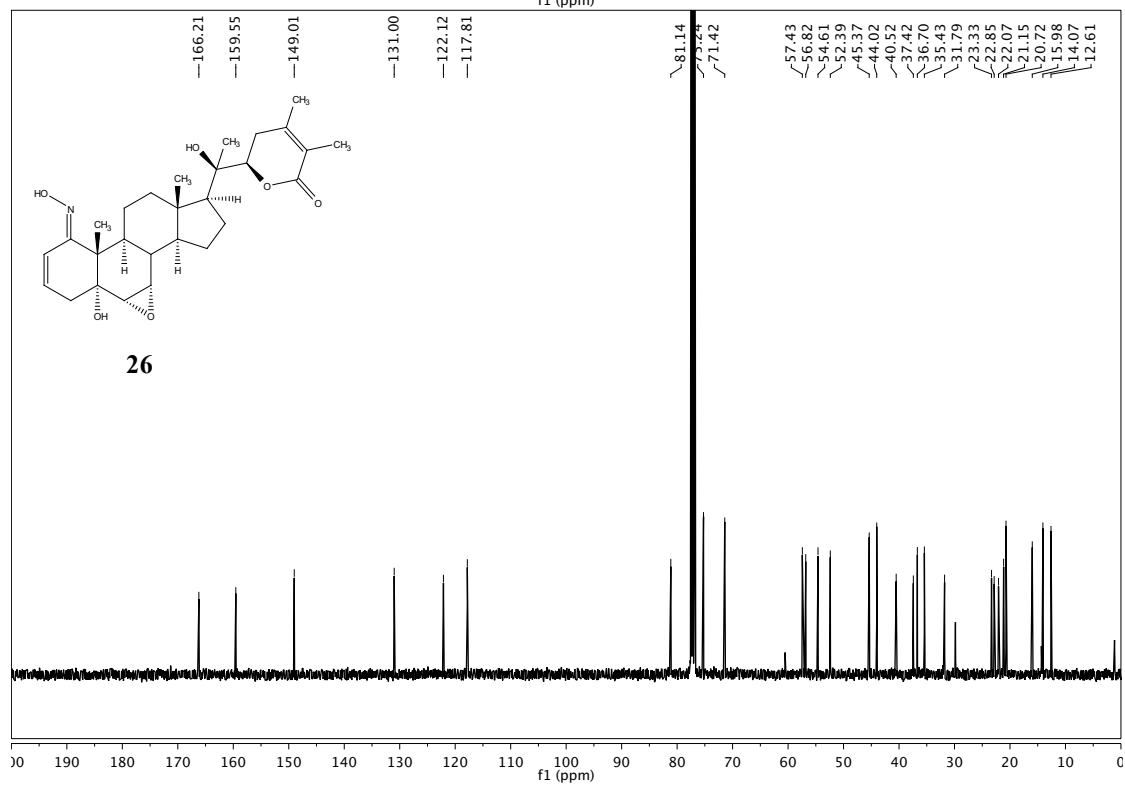

*Withanolide A: Synthesis and Structural Requirements for Neurite Outgrowth*

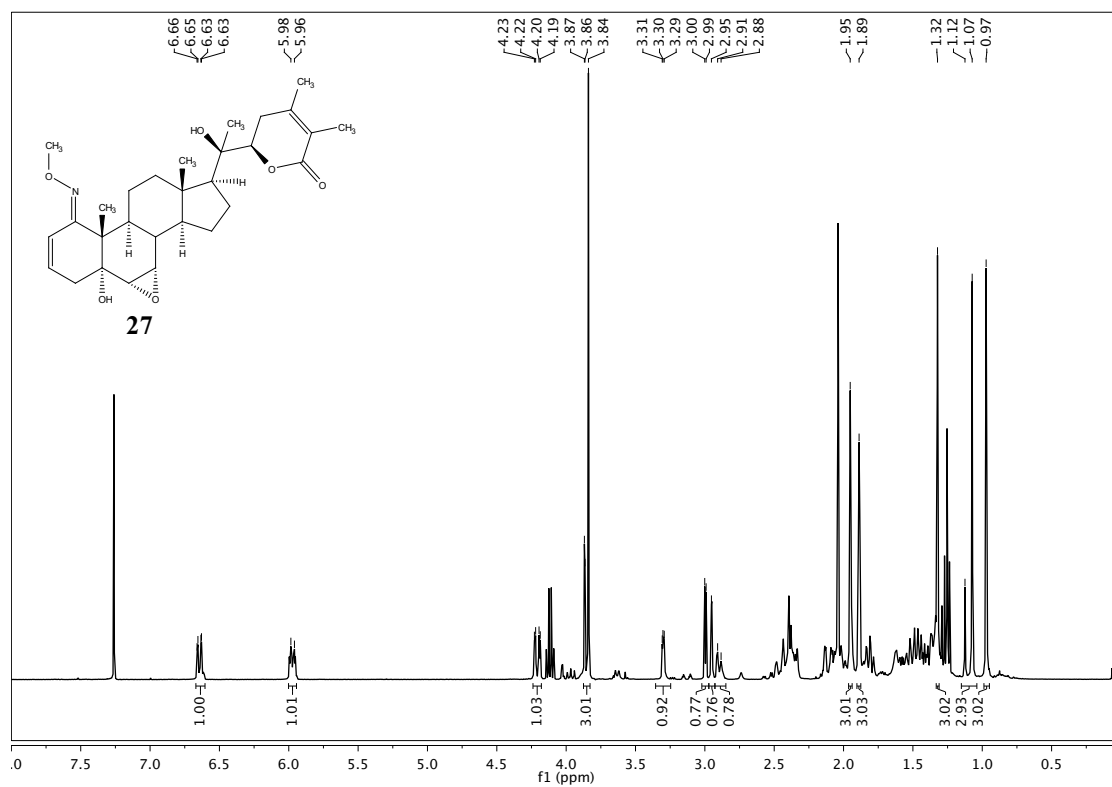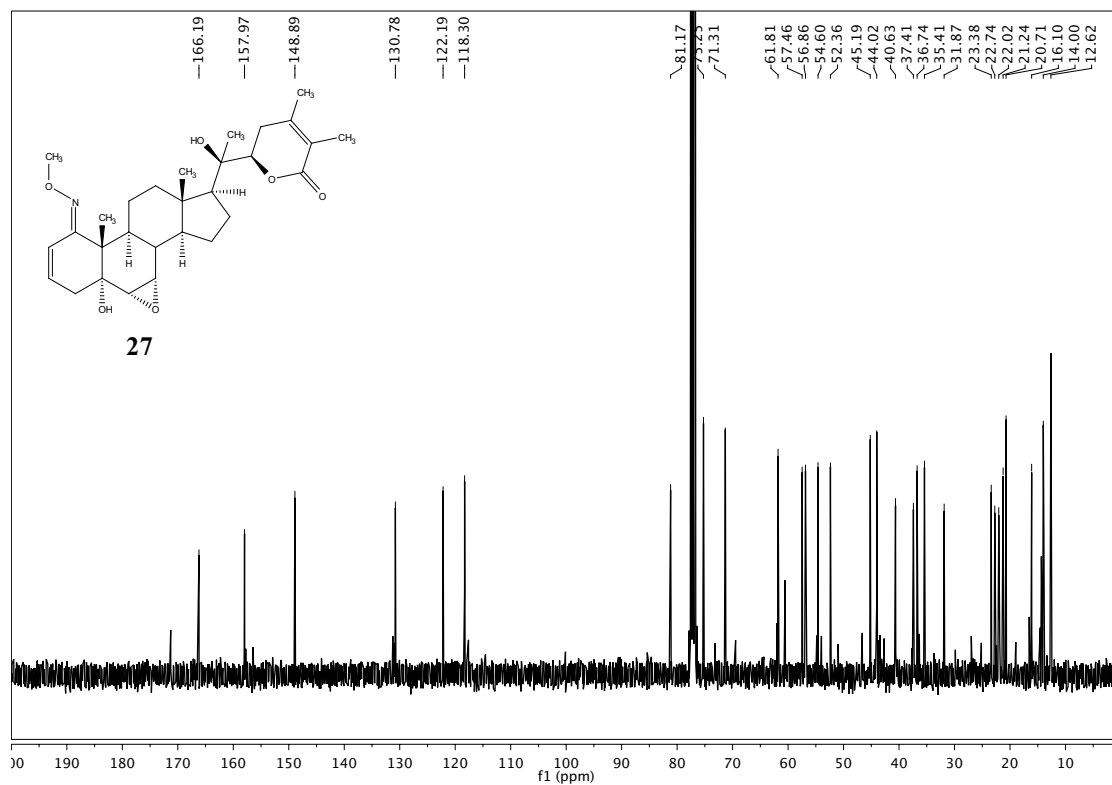



*Withanolide A: Synthesis and Structural Requirements for Neurite Outgrowth*

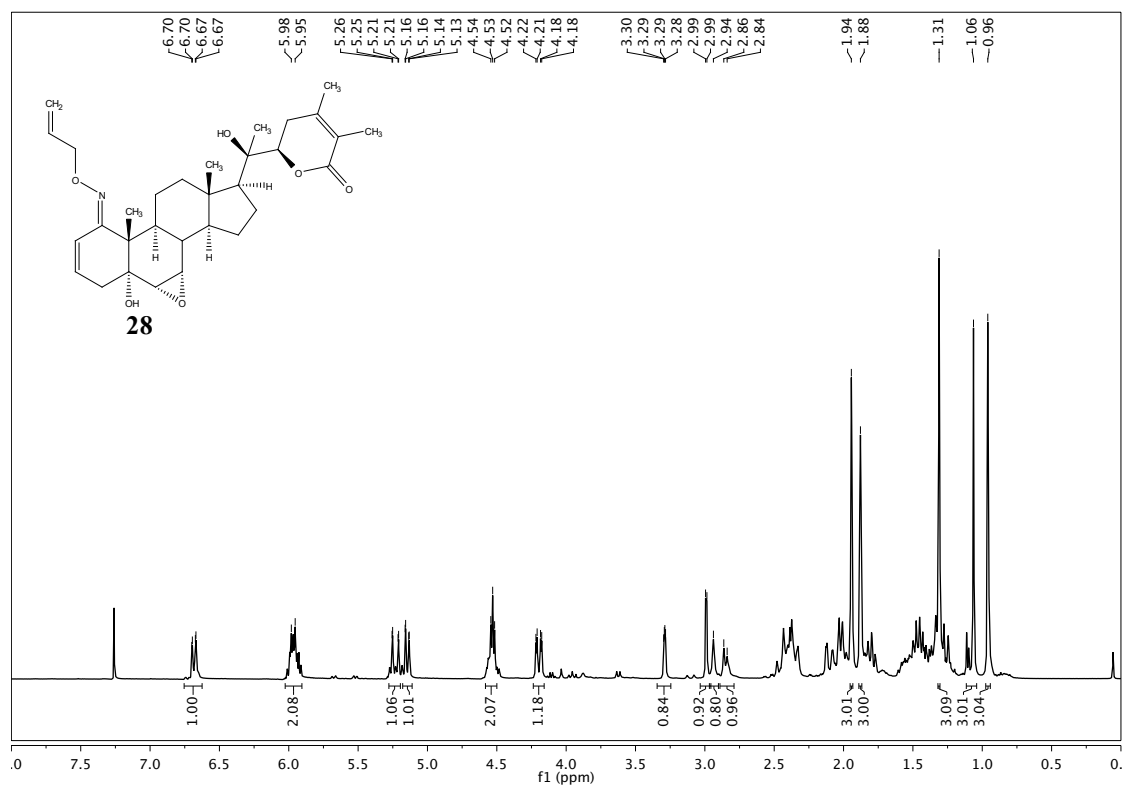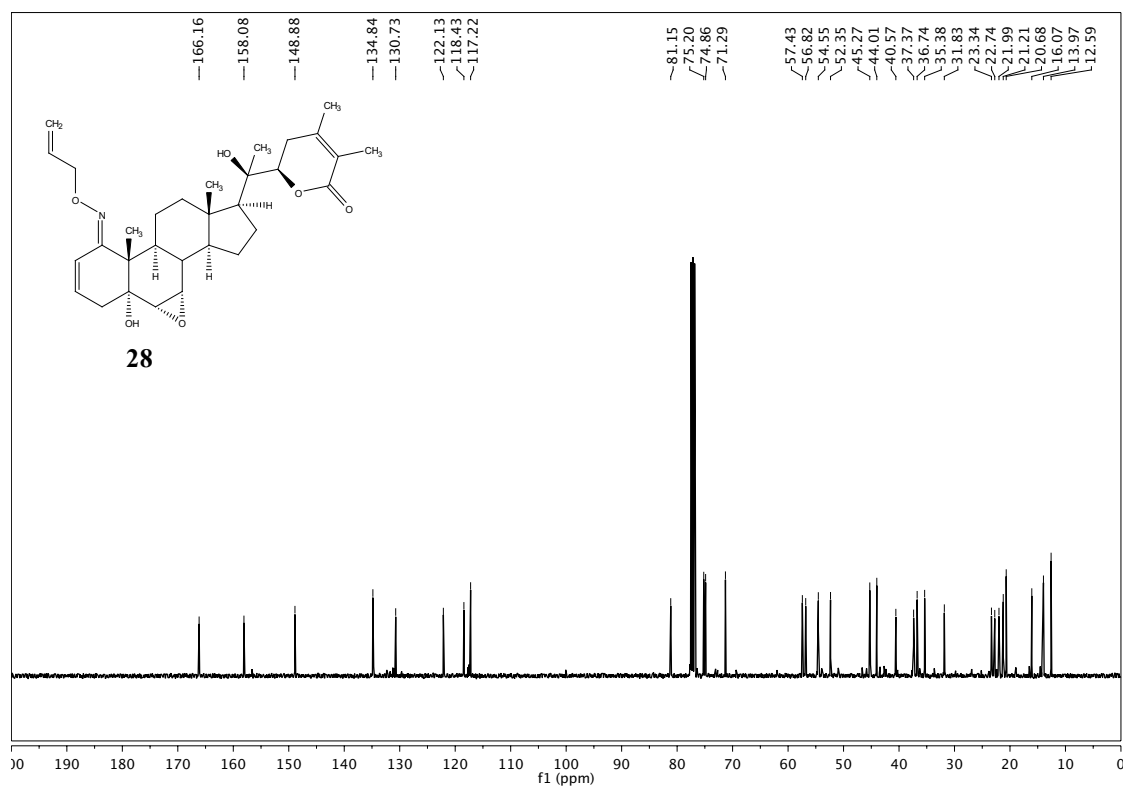

*Withanolide A: Synthesis and Structural Requirements for Neurite Outgrowth*

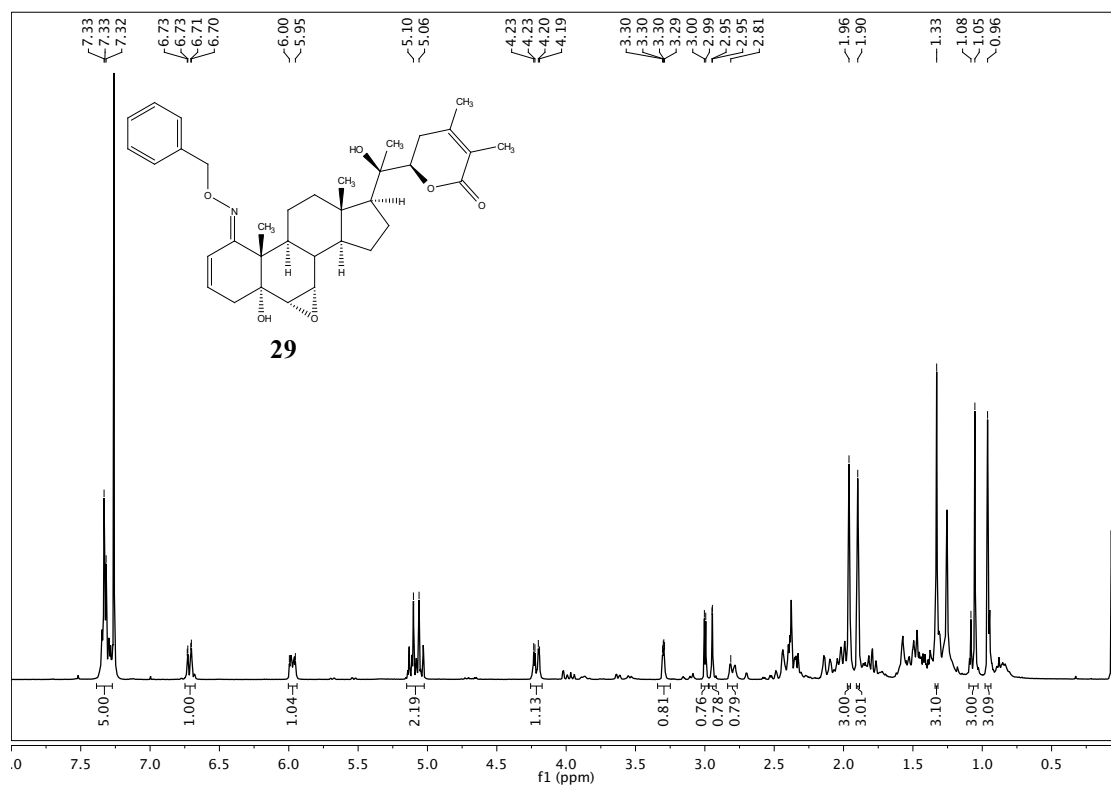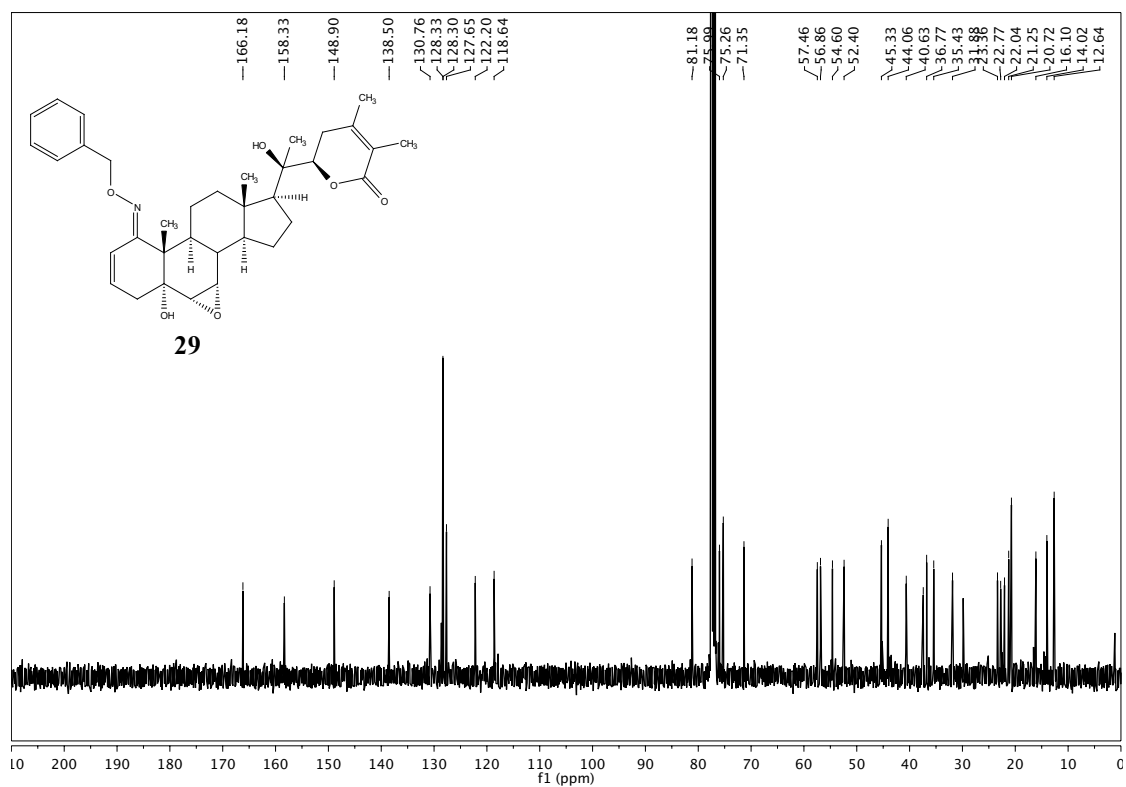

*Withanolide A: Synthesis and Structural Requirements for Neurite Outgrowth*

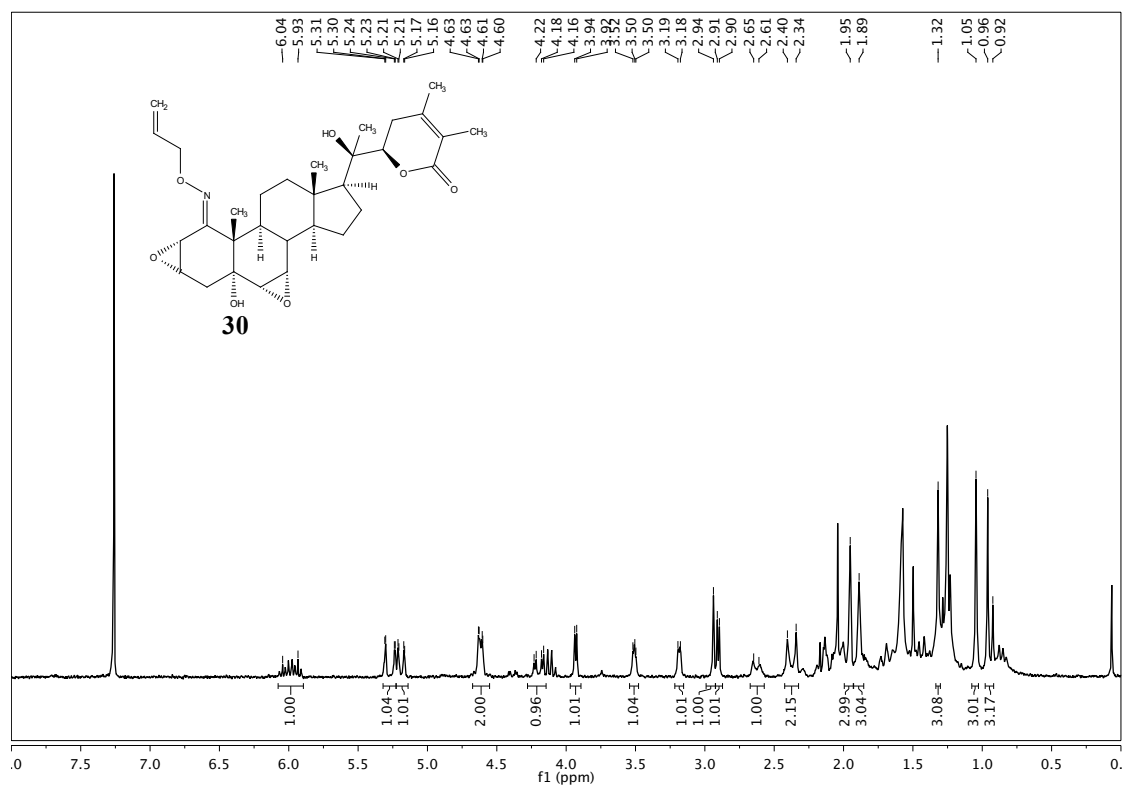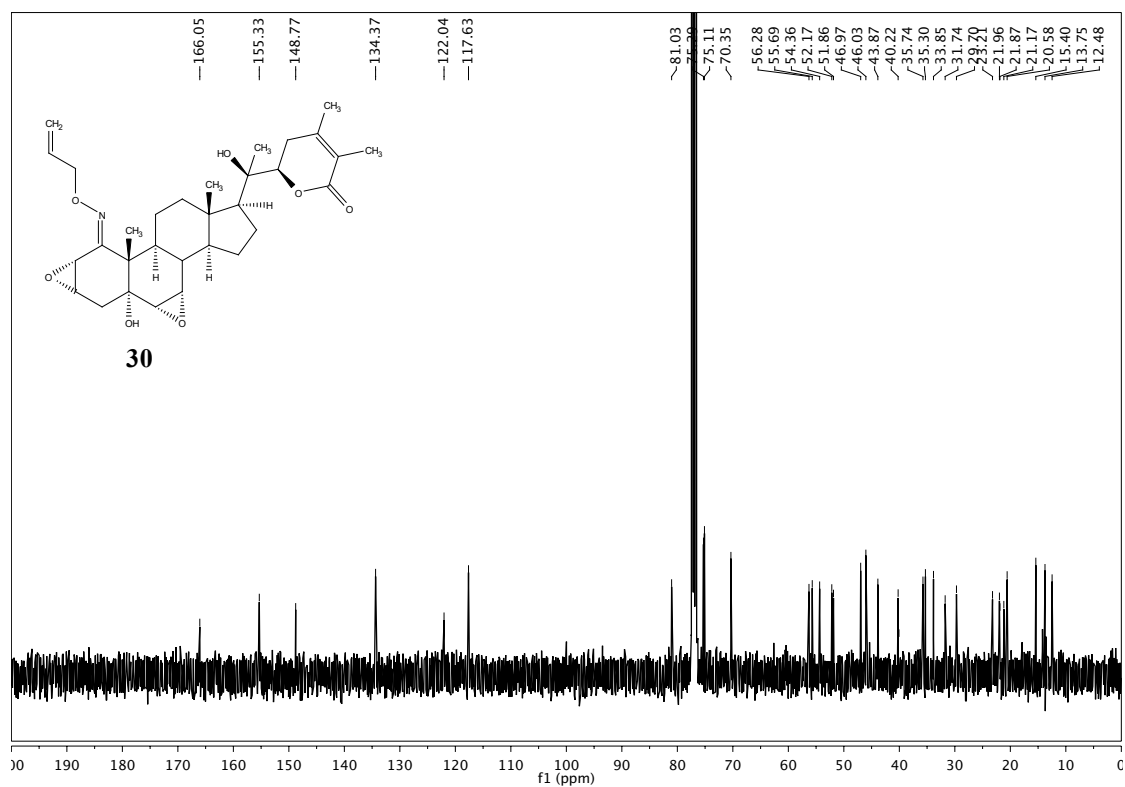

#### IV. X-Ray Data

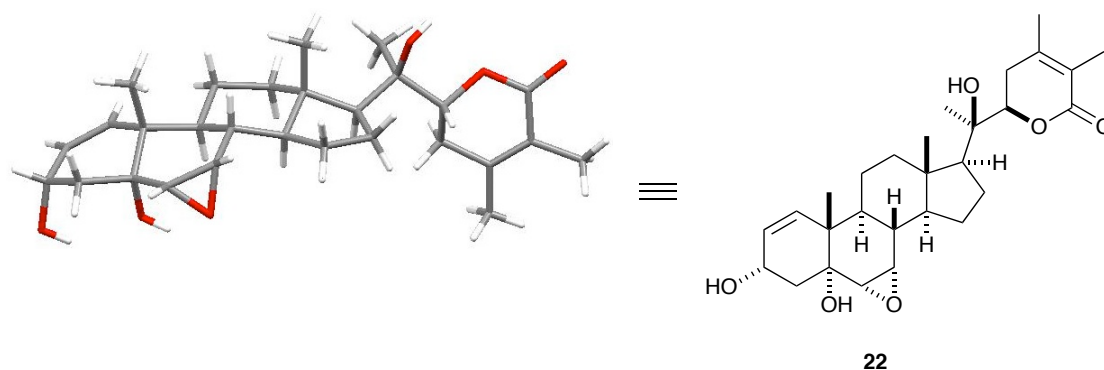

**Table 1:** Crystal data for allylic alcohol **22** (CCDC 924130).

|                                   |                                                                     |
|-----------------------------------|---------------------------------------------------------------------|
| Formula                           | C <sub>28</sub> H <sub>40</sub> O <sub>6</sub>                      |
| Formula weight                    | 472.62                                                              |
| Z, calculated density             | 4, 1.256 Mg · m <sup>-3</sup>                                       |
| F(000)                            | 1024                                                                |
| Description and size of crystal   | colourless, 0.030·0.090·0.270 mm <sup>3</sup>                       |
| Absorption coefficient            | 0.087 mm <sup>-1</sup>                                              |
| Min/max transmission              | 0.99 / 1.00                                                         |
| Temperature                       | 123 K                                                               |
| Radiation(wavelength)             | Mo K <sub>α</sub> (λ = 0.71073 Å)                                   |
| Crystal system, space group       | orthorhombic, <i>P</i> 2 <sub>1</sub> 2 <sub>1</sub> 2 <sub>1</sub> |
| a                                 | 11.3881(10) Å                                                       |
| b                                 | 13.7611(13) Å                                                       |
| c                                 | 15.9461(16) Å                                                       |
| α                                 | 90°                                                                 |
| β                                 | 90°                                                                 |
| γ                                 | 90°                                                                 |
| V                                 | 2499.0(4) Å <sup>3</sup>                                            |
| Min/max Θ                         | 1.955° / 36.318°                                                    |
| Number of collected reflections   | 42220                                                               |
| Number of independent reflections | 6467 (merging r = 0.050)                                            |
| Number of observed reflections    | 4541 (I > 2.0σ(I))                                                  |
| Number of refined parameters      | 307                                                                 |
| r                                 | 0.0394                                                              |
| rW                                | 0.0673                                                              |
| Goodness of fit                   | 1.1096                                                              |

## V. Neuritogenic Properties

SH-SY5Y cells (obtained from DSMZ, Germany) were cultured either in *minimal essential medium* (MEM Glutamax, GIBCO, Invitrogen) containing 5% fetal bovine serum (FBS, GIBCO, Invitrogen) without antibiotics or in *Dulbecco's modified Eagle's medium* (DMEM, high glucose + L-glutamine, Sigma-Aldrich), containing 10% FBS and 1% of antibiotics in solution (10.000 units penicillin and 10 mg streptomycin/mL, Sigma-Aldrich). All experiments were conducted under strictly sterile conditions. Passage numbers 6 to 9 were used for the experiments. Cells were plated either on 24-well plates (Becton Dickinson Labware, Europe) or on collagen coated 24-well plates (Iwaki, Asahi Glass Co., Japan). After incubating for six days in the presence of the compounds, e.g. withanolide A (1  $\mu$ M), vehicle solution (DMSO, 0.1%, negative control) or *all-trans* retinoic acid (1  $\mu$ M, positive control, Sigma-Aldrich), cells were examined under a phase contrast microscope (Leica, Germany). Cells were examined in three randomly chosen areas per well (160x magnification). 18-21 wells were analyzed for withanolide A under different conditions (cond. A : MEM, uncoated wells; cond. B: DMEM, coated wells; cond. C : MEM, coated wells). More than 1500 cells were examined and ranked positive, if they had neurite processes of more than 50  $\mu$ M length. Large cell aggregates were not counted. The ratio of neurite positive cells to total cells was calculated. Error bars are given as SEM. Under conditions C, negative control pictures could not be obtained randomly, as almost exclusively cell aggregates were found. Therefore, wells were scanned for areas that were appropriate for evaluation.

*Withanolide A: Synthesis and Structural Requirements for Neurite Outgrowth*

**Representative micrographs:**

DMSO

withanolide A **1**

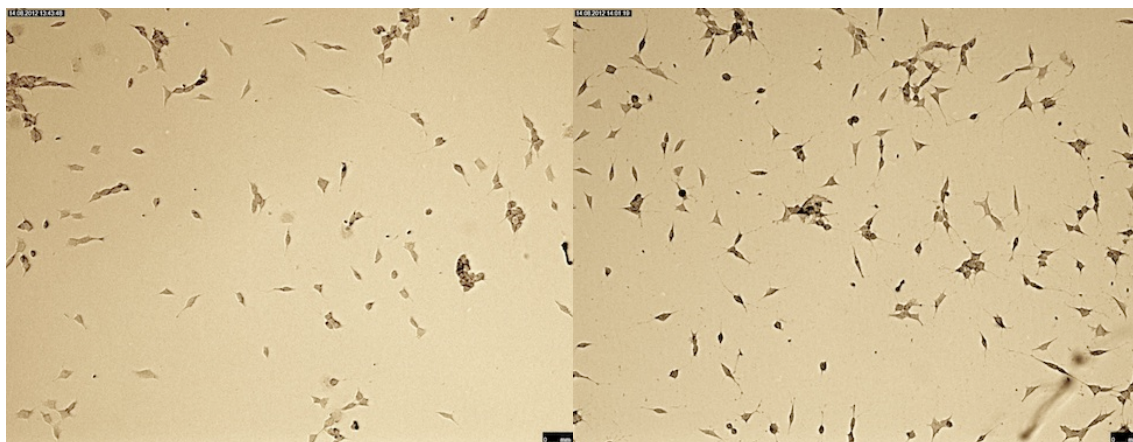

allyl alcohol **24**

allyl alcohol **22**

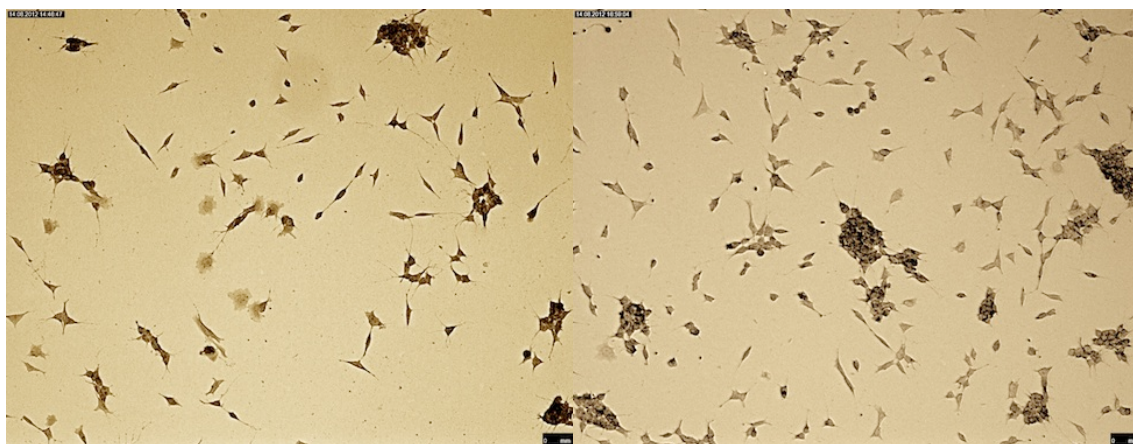

hydroxylamine **26**

allyl alcohol **16**

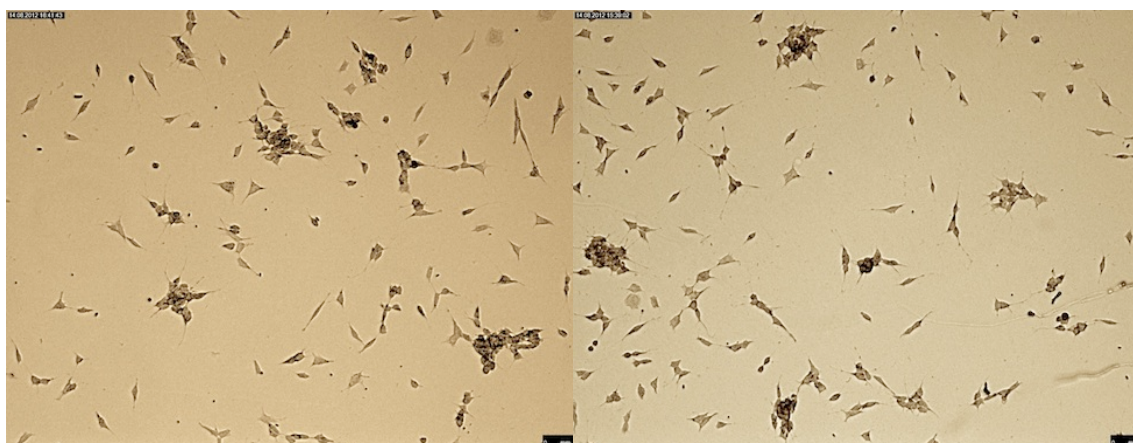



*Withanolide A: Synthesis and Structural Requirements for Neurite Outgrowth*

acetate **23**

epoxy allyloxime **30**

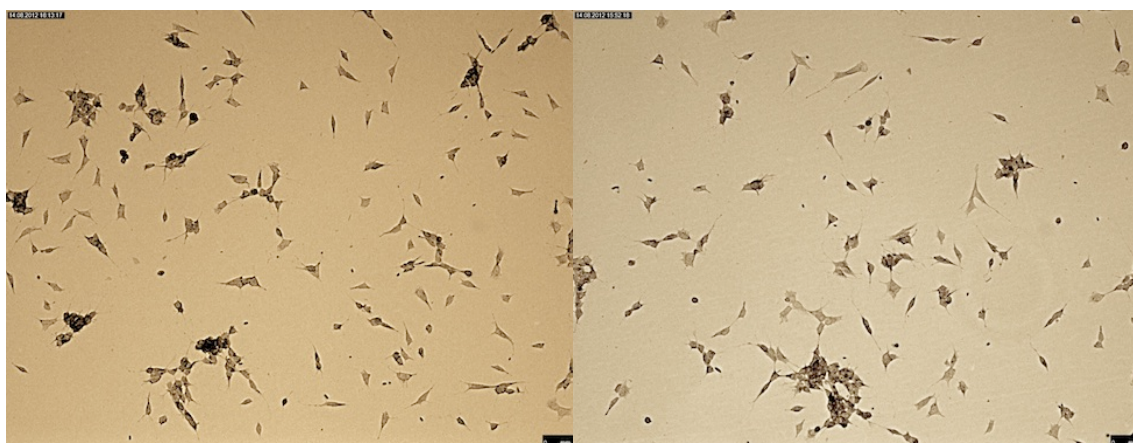

allyloxime **28**

epoxide **18**

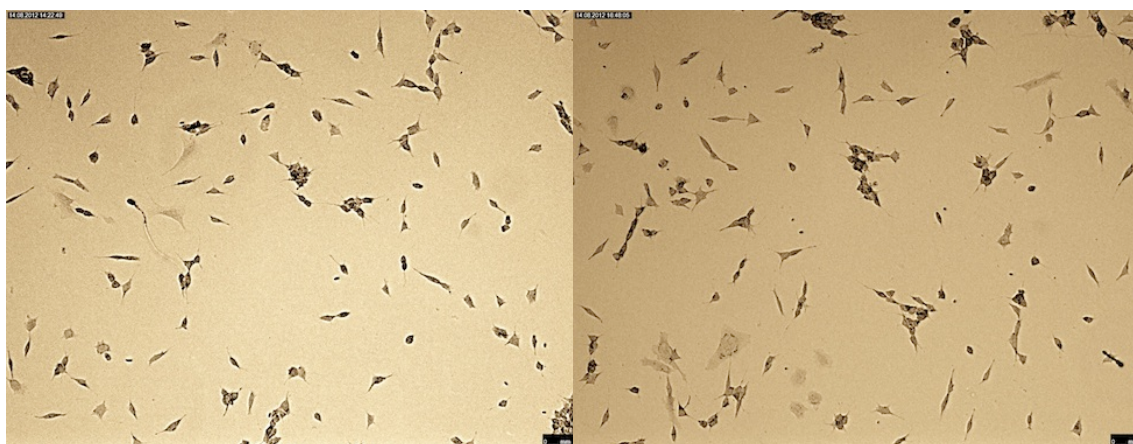

benzyloxime **29**

methyloxime **27**

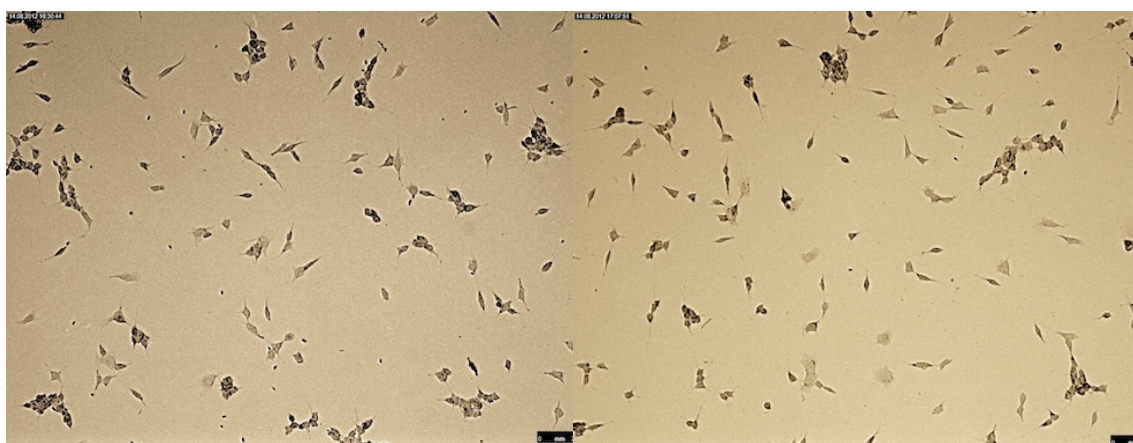

Supplement: c3sc50653c.pdf [file c3sc50653c.pdf]
